# Supplementary material for: Microbial Communities of the Shallow-Water Hydrothermal Vent Near Naples, Italy, and Chemosynthetic Symbionts Associated With a Free-Living Marine Nematode
Source: Front Microbiol. 2020 Aug 20;11:2023. doi: 10.3389/fmicb.2020.02023 (PMC7469538; doi:10.3389/fmicb.2020.02023)
Supplement: Supplementary file 5 [file Table_5.xlsx]

## Sheet: Feuil1
Supplementary Table S5. Accession Number.
#blast_taxonomy	observation_name	H1	H10	H11	H12	H13	H14	H16	H1_1	H1_10	H1_12	H1_2	H1_3	H1_4	H1_5	H1_6	H1_7	H1_8	H1_9	H2	H3	H4	H5	H6	H7	H8	H9	G10	G1_2016	G1_2017	G2_2016	G2_2017	G3_2016	G3_2017	G4	G5	G6_2016	G6_2017	G8	sediment_2016_G1	sediment_2016_G2	sediment_2016_G3	sediment_2017_G2	sediment_2017_G3	sediment_H1	sediment_H2	sediment_H3	sediment_Z1	sediment_Z2
Bacteria;Acetothermia;Acetothermiia;unknown order;unknown family;unknown genus;unknown species	OTU_360	0	1	174	0	0	0	2	0	252	0	531	0	2	2	1	77	0	0	0	0	0	0	1	219	0	0	13	0	0	0	1	0	0	0	0	0	131	0	0	3	0	1	1	50	38	23	1	1
Bacteria;Acidobacteria;Acidobacteriia;Solibacterales;Solibacteraceae (Subgroup 3);PAUC26f;unknown species	OTU_1206	0	0	0	0	0	0	0	0	0	0	0	0	0	0	0	0	0	0	1	0	0	0	1	206	0	0	0	0	0	0	0	0	0	0	0	0	0	1	11	4	2	5	0	5	10	6	3	3
Bacteria;Acidobacteria;Aminicenantia;Aminicenantales;unknown family;unknown genus;unknown species	OTU_441	1	0	0	0	1	1	0	0	0	0	1	0	2	0	0	0	0	0	2	0	0	2	0	0	418	802	0	0	0	0	0	0	0	0	0	0	0	1	1	0	0	0	0	5	1	2	0	0
Bacteria;Acidobacteria;Aminicenantia;Aminicenantales;unknown family;unknown genus;unknown species	OTU_517	1	1	0	0	0	0	0	64	0	1	0	0	1	0	0	0	0	0	0	0	0	0	0	0	2	930	0	0	0	0	1	0	0	0	1	0	1	0	1	1	1	0	0	0	1	1	0	2
Bacteria;Acidobacteria;Aminicenantia;Aminicenantales;unknown family;unknown genus;unknown species	OTU_613	0	0	0	0	0	0	0	1	0	0	0	0	0	0	0	0	2	0	1	1	0	0	0	0	1	0	0	0	1	0	0	0	0	0	1	0	0	1	2	9	1	290	426	1	0	0	9	26
Bacteria;Acidobacteria;d142;unknown order;unknown family;unknown genus;unknown species	OTU_597	0	0	0	1	0	0	1	0	0	0	0	0	2	0	1	0	0	0	0	0	0	0	1	0	0	0	0	0	0	0	0	0	1	0	0	0	0	0	0	0	0	0	0	0	1	1	0	0
Bacteria;Acidobacteria;Holophagae;Acanthopleuribacterales;Acanthopleuribacteraceae;Thermotomaculum;unknown species	OTU_612	0	0	0	0	0	0	1	0	0	1	0	3	0	0	0	1	0	0	1	0	0	0	0	0	0	0	1	0	0	0	0	0	0	1	0	0	1	0	14	68	17	137	139	0	1	0	141	144
Bacteria;Acidobacteria;Holophagae;Acanthopleuribacterales;Acanthopleuribacteraceae;Thermotomaculum;unknown species	OTU_811	0	0	0	0	0	4	0	0	0	0	238	0	0	0	0	1	0	0	1	1	0	0	0	0	0	0	0	0	0	0	0	0	0	0	1	0	0	1	0	1	0	1	2	98	78	101	0	0
Bacteria;Acidobacteria;Holophagae;Acanthopleuribacterales;Acanthopleuribacteraceae;Thermotomaculum;unknown species	OTU_970	0	1	1	0	0	0	0	58	0	0	175	0	1	0	1	0	0	0	0	2	0	0	108	1	0	0	0	0	0	0	0	0	0	0	0	0	0	0	0	0	0	0	2	36	27	24	0	1
Bacteria;Acidobacteria;Subgroup 22;unknown order;unknown family;unknown genus;unknown species	OTU_644	0	0	0	0	0	1	1	0	0	1	190	0	1	0	0	0	1	0	0	0	0	0	0	0	2	0	0	0	0	0	1	0	0	1	0	0	0	0	7	4	2	4	1	160	177	164	0	0
Bacteria;Acidobacteria;Subgroup 22;unknown order;unknown family;unknown genus;unknown species	OTU_702	0	1	0	0	0	0	0	0	0	1	1	0	0	1	0	0	0	0	0	0	0	0	1	0	0	0	0	0	1	0	0	0	0	0	0	0	0	0	0	0	4	2	0	0	0	0	260	462
Bacteria;Acidobacteria;Subgroup 22;unknown order;unknown family;unknown genus;unknown species	OTU_880	0	0	0	0	1	0	1	0	0	0	186	1	2	0	0	1	0	0	0	0	0	0	315	0	1	0	0	0	0	0	0	0	0	0	0	0	1	0	2	0	0	0	0	29	37	44	0	1
Bacteria;Acidobacteria;Subgroup 22;unknown order;unknown family;unknown genus;unknown species	OTU_1018	0	0	0	1	0	0	0	0	0	0	0	0	0	0	0	0	0	0	0	0	0	1	0	0	0	0	0	0	0	0	0	0	2	0	0	0	0	0	91	53	56	19	16	0	0	0	44	46
Bacteria;Acidobacteria;Subgroup 22;unknown order;unknown family;unknown genus;unknown species	OTU_1121	0	0	0	0	0	0	0	0	0	0	0	0	0	0	0	0	0	0	0	1	0	0	0	0	0	0	0	0	0	0	0	0	0	0	0	0	0	0	12	15	12	28	19	0	0	0	71	103
Bacteria;Acidobacteria;Subgroup 6;unknown order;unknown family;unknown genus;unknown species	OTU_677	2	0	0	0	0	0	0	0	0	0	0	0	0	0	0	0	0	0	0	1	0	1	0	0	0	0	0	0	0	0	0	0	0	0	0	0	0	0	0	0	0	0	0	1	0	1	0	0
Bacteria;Acidobacteria;Thermoanaerobaculia;Thermoanaerobaculales;Thermoanaerobaculaceae;Subgroup 10;unknown species	OTU_715	0	0	0	1	0	1	0	0	0	0	0	1	1	0	0	0	0	0	1	0	0	0	0	0	2	0	0	0	1	0	0	0	0	0	0	0	1	0	0	2	0	1	1	0	1	1	0	1
Bacteria;Acidobacteria;Thermoanaerobaculia;Thermoanaerobaculales;Thermoanaerobaculaceae;Subgroup 23;unknown species	OTU_216	2	1	0	0	0	0	1	1	0	0	2	0	1	0	0	1	0	0	2	0	0	0	0	1	1	1	4	0	0	0	0	0	0	0	1	0	120	2	8	14	9	34	28	0	0	2	109	139
Bacteria;Acidobacteria;Thermoanaerobaculia;Thermoanaerobaculales;Thermoanaerobaculaceae;Subgroup 23;unknown species	OTU_547	0	0	0	408	0	0	409	145	0	0	99	0	2	1	0	2	0	0	1	2	0	0	1	216	0	0	0	0	0	0	0	0	0	0	0	0	0	0	3	6	0	4	3	51	73	64	4	3
Bacteria;Acidobacteria;Thermoanaerobaculia;Thermoanaerobaculales;Thermoanaerobaculaceae;Subgroup 23;unknown species	OTU_615	0	1	0	1	1	1	1	0	0	2	0	0	2	1	0	0	0	0	0	1	3	1	0	45	1	0	0	0	0	0	0	0	2	1	0	0	0	0	1	1	0	1	0	71	86	88	0	0
Bacteria;Acidobacteria;Thermoanaerobaculia;Thermoanaerobaculales;Thermoanaerobaculaceae;Subgroup 23;unknown species	OTU_740	3	151	0	0	1	2	0	0	0	0	0	0	1	1	0	0	0	0	0	0	0	1	129	171	0	1	0	0	0	0	0	0	0	0	1	0	0	0	1	2	1	3	1	50	51	53	1	0
Bacteria;Acidobacteria;Thermoanaerobaculia;Thermoanaerobaculales;Thermoanaerobaculaceae;Subgroup 23;unknown species	OTU_1224	0	0	0	0	0	0	0	0	0	0	0	0	0	0	0	1	0	1	0	0	0	0	0	0	0	0	0	0	0	0	0	0	0	0	0	0	0	0	72	81	42	31	13	16	17	20	5	8
Bacteria;Acidobacteria;Thermoanaerobaculia;Thermoanaerobaculales;Thermoanaerobaculaceae;TPD-58;unknown species	OTU_573	0	0	1	5	0	0	2	258	0	0	0	627	1	0	1	1	1	0	0	0	0	2	0	0	1	0	0	0	0	0	0	0	0	0	0	0	0	0	0	0	2	0	1	2	4	1	0	0
Bacteria;Acidobacteria;Thermoanaerobaculia;Thermoanaerobaculales;Thermoanaerobaculaceae;TPD-58;unknown species	OTU_1135	0	0	0	323	0	0	0	0	0	0	0	1	0	0	0	0	0	0	1	0	0	0	0	0	1	0	0	0	0	0	0	0	0	0	0	0	0	0	1	0	0	0	1	1	1	2	0	1
Bacteria;Actinobacteria;Acidimicrobiia;Actinomarinales;Actinomarinaceae;Candidatus Actinomarina;Multi-affiliation	OTU_38	5	1	4	4	4	7	4	10	2	4	3	4	9	1	0	4	3	4	3	8	1	6	3	3	8	1	1	0	4	0	3	0	6	5	4	0	4	2	7	8	7	7	11	4	10	8	9	8
Bacteria;Actinobacteria;Acidimicrobiia;Actinomarinales;Actinomarinaceae;Candidatus Actinomarina;Multi-affiliation	OTU_75	0	1	0	1	0	1	3	4	1	1	0	1	3	2	0	2	3	0	0	0	1	3	0	1	4	1	1	0	0	0	3	0	8	3	1	0	1	5	3	0	2	1	0	0	3	2	4	3
Bacteria;Actinobacteria;Acidimicrobiia;Actinomarinales;Actinomarinaceae;Candidatus Actinomarina;Multi-affiliation	OTU_971	0	1	0	0	0	0	0	0	0	2	0	0	0	0	0	0	0	0	0	0	0	0	0	0	0	0	0	0	0	0	2	0	0	0	0	0	0	0	0	0	0	0	0	0	0	0	0	0
Bacteria;Actinobacteria;Acidimicrobiia;Actinomarinales;Actinomarinaceae;Candidatus Actinomarina;unknown species	OTU_191	1	2	2	1	0	0	1	0	1	0	0	0	5	1	0	0	0	0	0	0	0	0	2	0	3	1	0	0	1	0	1	0	100	2	0	0	2	0	1	3	1	1	1	1	0	0	1	1
Bacteria;Actinobacteria;Acidimicrobiia;Actinomarinales;Actinomarinaceae;Candidatus Actinomarina;unknown species	OTU_1789	0	0	0	0	0	0	0	0	0	0	0	0	0	0	0	0	0	0	0	0	0	0	0	0	0	0	0	0	0	0	0	0	0	0	0	0	0	0	1	0	0	0	0	0	0	0	0	0
Bacteria;Actinobacteria;Acidimicrobiia;Actinomarinales;unknown family;unknown genus;bacterium WH6-7	OTU_99	4	2	1	2	0	1	3	3	2	1	1	3	8	2	2	1	5	1	1	2	0	2	4	1	4	4	2	0	1848	0	1	0	1	3	0	0	279	2	678	745	397	457	698	1	5	7	261	363
Bacteria;Actinobacteria;Acidimicrobiia;Actinomarinales;unknown family;unknown genus;unknown species	OTU_56	2	2	2	7	0	3	2	4	0	1	2	3	8	0	2	105	1	2	4	5	3	3	409	1	5	3	5	0	4	0	2	0	1	2	4	0	1	0	350	444	188	249	119	251	395	210	1585	2383
Bacteria;Actinobacteria;Acidimicrobiia;Actinomarinales;unknown family;unknown genus;unknown species	OTU_132	1	1	0	4	0	1	3	517	0	1	238	1710	0	0	0	149	232	1	2	1	1	0	1	0	4	0	1	0	2	0	2	0	2	2	0	0	2	1	20	17	12	6	1	394	661	363	12	24
Bacteria;Actinobacteria;Acidimicrobiia;Actinomarinales;unknown family;unknown genus;unknown species	OTU_225	2	0	0	0	0	0	3	3	1	0	0	0	1	0	0	0	0	0	1	1	0	1	1	2	0	1	2	0	0	0	0	0	1	0	0	0	1	1	1	0	2	0	2	1	0	0	444	560
Bacteria;Actinobacteria;Acidimicrobiia;Actinomarinales;unknown family;unknown genus;unknown species	OTU_257	1	1	2	0	0	1	1	323	127	1	2	0	246	3	518	209	0	14	1	3	1	1	9	0	129	3	1	0	1	0	0	0	1	2	0	0	4	1	9	7	12	3	4	259	413	243	2	2
Bacteria;Actinobacteria;Acidimicrobiia;Actinomarinales;unknown family;unknown genus;unknown species	OTU_621	1	0	1	1	0	3	1	0	0	1	0	0	0	510	1	0	0	988	1	1	0	0	1	0	2	3	0	0	0	0	0	0	1	1	0	0	0	1	4	3	0	2	2	12	10	5	1	0
Bacteria;Actinobacteria;Acidimicrobiia;Actinomarinales;unknown family;unknown genus;unknown species	OTU_718	0	1	0	1	0	0	2	1	1	0	1	0	0	2	1	0	0	0	2	0	1	2	0	2	305	0	0	0	2	0	0	0	0	0	1	0	275	0	298	386	550	5	13	15	16	16	9	20
Bacteria;Actinobacteria;Acidimicrobiia;Actinomarinales;unknown family;unknown genus;unknown species	OTU_975	0	0	0	0	0	0	0	0	0	0	1	0	0	0	0	0	0	0	0	1	0	0	1	0	1	0	0	0	2	0	0	0	0	0	0	0	0	0	121	121	167	3	0	0	1	0	5	7
Bacteria;Actinobacteria;Acidimicrobiia;Actinomarinales;unknown family;unknown genus;unknown species	OTU_1063	0	0	0	0	0	0	0	1	0	0	0	0	0	1	0	0	0	0	0	0	0	0	0	0	2	522	0	0	0	0	1	0	0	0	1	0	0	0	0	0	0	2	2	7	7	5	0	0
Bacteria;Actinobacteria;Acidimicrobiia;Actinomarinales;unknown family;unknown genus;unknown species	OTU_1154	0	0	0	0	0	0	0	1	0	0	0	0	0	0	0	0	0	0	0	0	0	0	478	0	0	0	1	0	0	0	1	0	0	0	0	0	0	0	1	0	0	1	0	2	3	2	0	2
Bacteria;Actinobacteria;Acidimicrobiia;Actinomarinales;unknown family;unknown genus;unknown species	OTU_1238	0	0	0	0	0	0	0	0	0	0	0	0	0	0	0	0	0	0	0	0	0	0	1	0	0	0	0	0	0	0	0	0	0	0	0	0	1	0	2	0	3	0	0	0	1	0	113	144
Bacteria;Actinobacteria;Acidimicrobiia;Microtrichales;Ilumatobacteraceae;Ilumatobacter;unknown species	OTU_449	0	1	0	1	1	0	0	0	0	1	0	0	0	0	0	0	1	0	1	1	0	0	1	0	1	0	1	0	2	0	0	0	0	0	0	0	2	0	2	5	11	5	0	0	1	0	4	5
Bacteria;Actinobacteria;Acidimicrobiia;Microtrichales;Ilumatobacteraceae;unknown genus;unknown species	OTU_515	0	0	1	1	0	0	0	1	0	0	0	0	1	0	0	1	1	0	1	0	0	1	1	0	0	0	0	0	0	0	0	0	0	0	0	0	1	0	0	0	0	0	0	0	1	1	3	0
Bacteria;Actinobacteria;Acidimicrobiia;Microtrichales;Ilumatobacteraceae;unknown genus;unknown species	OTU_570	0	1	0	0	0	0	1	1	0	808	0	1	0	0	0	0	0	0	0	0	0	0	0	0	1	0	0	0	0	0	0	0	0	0	1	0	0	0	1	1	2	1	0	0	0	1	1	0
Bacteria;Actinobacteria;Acidimicrobiia;Microtrichales;Microtrichaceae;IMCC26207;unknown species	OTU_317	2	0	3	2	0	0	0	1	0	0	1	0	1	0	0	2	0	0	0	1	1	0	0	0	1	0	3	0	0	0	2	0	0	0	0	0	1	0	0	1	0	0	0	1	2	1	0	0
Bacteria;Actinobacteria;Acidimicrobiia;Microtrichales;Microtrichaceae;Sva0996 marine group;Multi-affiliation	OTU_645	0	0	0	0	0	0	0	0	1	0	0	0	0	0	1	1	0	0	1	1	0	0	0	0	0	0	0	0	0	0	1	0	1	0	0	0	0	0	0	0	0	4	0	0	1	0	1	1
Bacteria;Actinobacteria;Acidimicrobiia;Microtrichales;Microtrichaceae;Sva0996 marine group;unknown species	OTU_404	1	1	0	1	0	0	0	0	0	4	0	2	1	1	2	0	0	1	1	1	1	3	1	0	1	1	0	0	0	0	1	0	1	2	0	0	0	0	1	1	1	0	1	3	0	4	3	4
Bacteria;Actinobacteria;Acidimicrobiia;Microtrichales;Microtrichaceae;Sva0996 marine group;unknown species	OTU_609	0	0	0	0	0	758	0	0	0	0	0	0	0	0	0	0	0	0	0	1	0	0	0	0	0	0	0	0	0	0	0	0	1	0	0	0	0	0	2	0	1	0	2	1	3	3	3	1
Bacteria;Actinobacteria;Acidimicrobiia;Microtrichales;Microtrichaceae;Sva0996 marine group;unknown species	OTU_1029	0	0	0	0	0	0	0	0	0	0	0	0	0	0	0	0	0	0	0	0	0	0	336	0	0	0	0	0	0	0	0	0	0	0	0	0	0	0	1	4	10	0	3	0	0	0	0	1
Bacteria;Actinobacteria;Acidimicrobiia;Microtrichales;Microtrichaceae;Sva0996 marine group;unknown species	OTU_1125	0	0	0	0	0	0	0	0	0	1	0	1	1	1	0	0	0	0	0	0	0	1	304	1	1	0	0	0	0	0	0	0	0	1	0	0	0	1	1	1	2	0	1	0	0	0	1	3
Bacteria;Actinobacteria;Acidimicrobiia;Microtrichales;Microtrichaceae;Sva0996 marine group;unknown species	OTU_1280	0	0	0	0	0	1	0	0	0	0	0	0	1	0	0	0	0	0	0	242	0	0	0	0	0	1	0	0	0	0	0	0	0	0	0	0	0	0	0	0	0	0	0	0	0	0	0	1
Bacteria;Actinobacteria;Acidimicrobiia;Microtrichales;Microtrichaceae;Sva0996 marine group;unknown species	OTU_1327	0	0	2	0	0	1	0	0	0	0	222	0	0	0	0	0	0	0	0	0	0	0	0	0	1	0	0	0	0	0	0	0	0	0	0	0	0	0	2	0	6	5	5	0	0	2	7	3
Bacteria;Actinobacteria;Acidimicrobiia;Microtrichales;Microtrichaceae;unknown genus;unknown species	OTU_1114	0	0	0	0	0	0	0	0	0	0	0	0	0	0	0	0	0	0	0	0	0	280	0	0	1	0	0	0	0	0	0	0	0	0	1	0	0	1	11	8	7	1	3	1	2	0	0	6
Bacteria;Actinobacteria;Acidimicrobiia;Microtrichales;Microtrichaceae;unknown genus;unknown species	OTU_1264	0	0	0	0	1	0	0	0	0	0	0	0	0	0	0	233	0	0	0	2	0	1	0	0	0	1	0	0	0	0	0	0	0	0	1	0	0	0	1	1	4	0	0	0	2	0	0	1
Bacteria;Actinobacteria;Actinobacteria;Actinomycetales;Actinomycetaceae;Actinomyces;Actinomyces hyovaginalis	OTU_235	0	0	0	0	0	0	0	0	0	0	0	0	0	0	0	0	0	0	0	0	0	0	0	0	0	0	0	1	0	1	0	641	0	0	0	1291	0	0	0	0	0	0	0	0	0	0	0	0
Bacteria;Actinobacteria;Actinobacteria;Actinomycetales;Actinomycetaceae;Actinomyces;unknown species	OTU_337	2	2	4	0	2	1283	5	3	0	1	0	0	2	2	0	0	0	2	522	1292	2	0	41	3	3	1	2	0	1	0	1	0	2	1	3	0	0	0	1	1	1	3	0	2	2	1	1	2
Bacteria;Actinobacteria;Actinobacteria;Actinomycetales;Actinomycetaceae;Actinomyces;unknown species	OTU_429	0	0	0	0	0	0	0	0	0	0	0	0	0	0	0	0	0	0	0	0	0	0	0	0	0	0	0	0	0	0	0	916	0	0	0	258	0	0	0	0	0	0	0	0	0	0	0	0
Bacteria;Actinobacteria;Actinobacteria;Actinomycetales;Actinomycetaceae;Varibaculum;unknown species	OTU_1072	0	0	0	0	0	0	0	0	0	0	0	0	0	0	0	0	0	0	0	0	0	0	0	0	1	0	0	0	1	0	0	0	0	0	0	0	1	0	0	0	0	0	1	0	0	0	0	0
Bacteria;Actinobacteria;Actinobacteria;Bifidobacteriales;Bifidobacteriaceae;Bifidobacterium;Multi-affiliation	OTU_145	1	5	2	145	1	914	2	2	0	267	0	3	465	1	1	0	1	0	3	1	1	459	5	1	3	0	0	1	2	0	2	88	2	25	5	545	2	258	1	4	1	5	1	2	4	3	1	3
Bacteria;Actinobacteria;Actinobacteria;Bifidobacteriales;Bifidobacteriaceae;Bifidobacterium;Multi-affiliation	OTU_604	0	1	1	1	0	0	4	0	0	0	0	1	2	1	0	0	0	0	2	2	0	1	1	0	0	0	0	0	0	0	1	0	1	0	1	0	2	1	10	1	0	1	3	0	3	0	0	0
Bacteria;Actinobacteria;Actinobacteria;Bifidobacteriales;Bifidobacteriaceae;Bifidobacterium;Multi-affiliation	OTU_832	1	0	1	0	0	0	0	2	0	0	88	1	1	1	1	1	0	0	0	403	0	1	0	0	0	0	0	0	0	0	0	0	0	0	0	0	1	0	1	1	1	1	1	1	1	0	0	1
Bacteria;Actinobacteria;Actinobacteria;Corynebacteriales;Corynebacteriaceae;Corynebacterium 1;Corynebacterium macginleyi	OTU_93	4	1	2	2	2	3	211	0	1	1	0	2	4	538	0	1	143	2	0	1	1	1	1	2	3	1	1	486	2	1855	1	557	1	0	4	1	2	1	2	1	1	0	0	3	0	1	0	2
Bacteria;Actinobacteria;Actinobacteria;Corynebacteriales;Corynebacteriaceae;Corynebacterium 1;Corynebacterium sp.	OTU_1272	0	1	0	1	255	1	0	0	0	0	0	0	0	0	0	1	0	0	0	1	0	0	0	0	0	0	0	0	0	0	0	0	0	0	0	0	0	0	1	0	0	1	0	1	0	0	0	0
Bacteria;Actinobacteria;Actinobacteria;Corynebacteriales;Corynebacteriaceae;Corynebacterium 1;Multi-affiliation	OTU_104	1	4	2	3	3	6	3	4	0	3	2	4	4	1387	1	1	1	1	1	4	144	3	221	6	5	904	0	1	1	0	2139	0	2	5	3	0	2	4	2	3	1	1	3	2	2	2	4	4
Bacteria;Actinobacteria;Actinobacteria;Corynebacteriales;Corynebacteriaceae;Corynebacterium 1;Multi-affiliation	OTU_199	3	0	0	2	0	1913	1	1	2	1	0	1	2	1	0	0	0	0	1	0	0	1	0	2	2	1	0	1	1	563	2	0	0	0	1	0	0	2	0	1	1	2	1	3	0	0	1	0
Bacteria;Actinobacteria;Actinobacteria;Corynebacteriales;Corynebacteriaceae;Corynebacterium 1;Multi-affiliation	OTU_451	0	0	0	2	0	0	1	0	0	2	0	0	1	0	0	0	0	0	0	3	0	0	0	2	0	0	0	0	0	329	0	0	2	0	2	0	0	0	0	0	0	1	0	0	0	2	0	0
Bacteria;Actinobacteria;Actinobacteria;Corynebacteriales;Corynebacteriaceae;Corynebacterium 1;Multi-affiliation	OTU_562	1	0	2	2	360	5	3	5	0	1	0	1	185	3	0	1	1	0	2	0	2	0	183	291	3	0	0	0	0	1	0	0	2	0	3	0	2	361	0	0	1	3	0	1	0	2	0	2
Bacteria;Actinobacteria;Actinobacteria;Corynebacteriales;Corynebacteriaceae;Corynebacterium 1;Multi-affiliation	OTU_684	1	0	0	0	0	1	0	0	0	0	1	1	3	0	0	0	0	0	0	0	0	640	1	0	0	0	0	0	0	0	0	0	0	0	0	0	2	0	0	0	0	0	0	0	0	0	0	0
Bacteria;Actinobacteria;Actinobacteria;Corynebacteriales;Corynebacteriaceae;Corynebacterium 1;Multi-affiliation	OTU_769	0	0	0	0	0	2	1	0	528	0	0	0	2	0	0	2	1	1	1	0	0	1	0	0	0	1	1	0	0	0	0	0	1	0	0	0	0	0	0	0	0	0	0	0	1	0	1	0
Bacteria;Actinobacteria;Actinobacteria;Corynebacteriales;Corynebacteriaceae;Corynebacterium 1;Multi-affiliation	OTU_796	0	0	0	0	1	1	0	0	0	0	0	0	0	0	0	0	0	0	0	0	0	361	0	0	0	0	0	0	0	1	0	1	0	0	0	146	0	2	0	0	0	0	0	0	0	0	0	0
Bacteria;Actinobacteria;Actinobacteria;Corynebacteriales;Corynebacteriaceae;Corynebacterium 1;unknown species	OTU_278	0	1	0	0	716	3	2	1	0	0	2	1	198	1	0	92	0	0	0	0	1	1	1	1	0	1	0	0	1	766	2	1	0	0	0	0	1	0	0	0	1	0	0	0	2	0	0	0
Bacteria;Actinobacteria;Actinobacteria;Corynebacteriales;Corynebacteriaceae;Corynebacterium 1;unknown species	OTU_751	0	0	0	0	0	0	0	0	0	0	0	0	0	0	0	0	0	0	0	0	0	0	0	0	0	0	0	0	0	514	0	0	0	0	0	1	0	0	0	0	0	0	0	0	0	0	0	0
Bacteria;Actinobacteria;Actinobacteria;Corynebacteriales;Corynebacteriaceae;Corynebacterium;Corynebacterium sp.	OTU_60	3	4	4	3	4	1281	3	4	0	273	4	4	151	507	2	3	3	5	4	5	1	242	1	145	12	4	3	9	3	21	2	2689	13	4	5	916	2	2942	5	3	1	3	1	1	4	0	0	3
Bacteria;Actinobacteria;Actinobacteria;Corynebacteriales;Corynebacteriaceae;Corynebacterium;Multi-affiliation	OTU_171	0	0	0	0	0	0	0	0	0	0	0	0	0	0	0	0	0	0	0	0	0	0	0	0	0	0	0	1	0	15	0	812	0	0	0	1930	0	0	0	0	0	0	0	0	0	0	0	1
Bacteria;Actinobacteria;Actinobacteria;Corynebacteriales;Corynebacteriaceae;Corynebacterium;Multi-affiliation	OTU_960	0	0	0	1	0	0	0	0	0	0	0	2	0	0	0	0	0	1	0	401	1	0	1	0	0	1	0	0	0	0	0	0	0	0	0	0	0	0	0	0	0	0	0	0	0	0	0	0
Bacteria;Actinobacteria;Actinobacteria;Corynebacteriales;Corynebacteriaceae;Corynebacterium;unknown species	OTU_658	0	0	0	1	0	0	1	0	0	0	0	0	3	1	0	0	0	0	1	0	0	0	0	0	1	493	0	0	0	227	0	0	0	0	0	0	1	0	1	1	0	0	0	0	0	0	0	0
Bacteria;Actinobacteria;Actinobacteria;Corynebacteriales;Nocardiaceae;Rhodococcus;Multi-affiliation	OTU_1211	0	1	0	0	0	0	0	2	0	0	0	0	1	269	0	1	0	0	0	0	0	0	0	0	0	0	0	0	0	2	0	0	0	1	0	1	0	0	0	0	0	0	0	0	0	0	1	2
Bacteria;Actinobacteria;Actinobacteria;Frankiales;Geodermatophilaceae;Blastococcus;Candidatus Blastococcus massiliensis AP3	OTU_860	0	0	0	0	0	0	0	1	1	1	0	0	1	0	0	0	1	483	0	2	0	0	0	0	0	1	0	0	1	0	0	0	0	0	0	0	0	1	0	1	0	0	0	1	0	0	1	0
Bacteria;Actinobacteria;Actinobacteria;Frankiales;Geodermatophilaceae;Blastococcus;Multi-affiliation	OTU_554	0	0	0	0	0	1	1	2	0	0	2	0	1	1	2	1	0	0	0	2	0	0	1	1	0	0	0	0	1	0	0	0	1	1	1	0	0	0	14	0	0	1	0	0	1	1	1	2
Bacteria;Actinobacteria;Actinobacteria;Frankiales;Geodermatophilaceae;Modestobacter;unknown species	OTU_26	15	9	2	9	6	19	8	18	5	5	4	24	26698	5	3	10	6	3	7	16	14	16	10	9	13	12	2	0	4	0	7	0	12	10	21	0	10	12	4	8	7	20	5	4	19	16	15	20
Bacteria;Actinobacteria;Actinobacteria;Frankiales;Geodermatophilaceae;Modestobacter;unknown species	OTU_1194	2	0	0	0	1	3	1	0	0	0	0	2	309	0	0	0	0	0	0	1	0	0	1	0	0	0	1	0	2	0	0	0	0	1	1	0	0	0	0	0	0	0	0	0	0	1	2	0
Bacteria;Actinobacteria;Actinobacteria;Frankiales;unknown family;unknown genus;unknown species	OTU_914	0	0	0	0	0	1	0	0	0	0	0	0	0	0	0	0	0	0	0	0	0	2	1	0	1	0	0	0	1	0	0	0	0	0	1	0	0	0	6	0	0	1	0	0	1	0	0	1
Bacteria;Actinobacteria;Actinobacteria;Kineosporiales;Kineosporiaceae;Kineococcus;Multi-affiliation	OTU_285	1819	0	0	0	1	1	0	0	1	0	2	0	1	0	0	0	2	0	0	0	0	0	0	0	1	0	1	0	0	0	0	0	1	1	1	0	2	1	0	1	2	3	0	0	0	0	0	1
Bacteria;Actinobacteria;Actinobacteria;Micrococcales;Cellulomonadaceae;Multi-affiliation;Multi-affiliation	OTU_808	1	0	0	0	0	523	1	0	0	0	0	0	0	0	0	1	0	0	0	0	0	0	0	0	0	0	0	0	0	0	0	0	0	0	0	0	0	1	0	0	0	1	0	1	0	0	0	1
Bacteria;Actinobacteria;Actinobacteria;Micrococcales;Dermabacteraceae;Brachybacterium;Multi-affiliation	OTU_456	3	2	0	1	0	1	1	2	0	2	0	3	3	0	0	0	0	0	0	3	2	0	0	0	6	2	0	0	0	0	0	0	3	1	1	0	2	2	3	1	1	1	1	0	2	2	2	1
Bacteria;Actinobacteria;Actinobacteria;Micrococcales;Microbacteriaceae;Microbacterium;Multi-affiliation	OTU_635	0	1	88	113	0	1	0	1	0	0	0	0	33	0	0	1	0	0	0	1	0	309	0	0	1	0	5	0	0	0	0	3	0	219	0	6	0	2	1	2	2	2	0	0	1	0	0	0
Bacteria;Actinobacteria;Actinobacteria;Micrococcales;Microbacteriaceae;Microbacterium;Multi-affiliation	OTU_685	2	1	2	0	1	2	58	1	1	1	0	0	2	0	0	2	0	0	35	1	0	0	0	0	0	1	0	0	0	0	1	0	2	0	1	0	0	560	2	1	1	0	0	1	0	0	0	0
Bacteria;Actinobacteria;Actinobacteria;Micrococcales;Microbacteriaceae;Multi-affiliation;Multi-affiliation	OTU_1028	0	1	0	0	363	2	2	1	0	0	0	0	0	0	0	0	0	0	0	0	0	0	0	0	0	0	0	0	0	0	0	0	0	0	0	0	1	0	0	1	0	0	0	0	0	0	1	0
Bacteria;Actinobacteria;Actinobacteria;Micrococcales;Microbacteriaceae;Pseudoclavibacter;Multi-affiliation	OTU_1164	0	0	0	0	0	0	0	0	0	0	0	0	0	0	0	0	0	0	0	0	0	0	0	0	0	0	0	0	0	0	0	9	0	0	0	248	0	0	0	0	0	0	0	0	0	0	0	0
Bacteria;Actinobacteria;Actinobacteria;Micrococcales;Microbacteriaceae;unknown genus;unknown species	OTU_477	1	0	0	1	0	0	1	4	0	2	0	1	1	0	0	0	0	1	0	0	0	152	0	0	0	0	0	0	0	0	0	0	1	1	1	0	0	1	20	1	0	1	0	0	1	0	1	1
Bacteria;Actinobacteria;Actinobacteria;Micrococcales;Micrococcaceae;Citricoccus;Multi-affiliation	OTU_617	0	0	0	0	0	0	0	0	0	0	0	0	0	0	0	0	0	0	0	0	0	0	0	0	0	0	0	0	0	0	0	530	0	0	0	178	0	0	0	0	0	0	0	0	0	0	0	0
Bacteria;Actinobacteria;Actinobacteria;Micrococcales;Micrococcaceae;Micrococcus;Multi-affiliation	OTU_50	7	2	2	2	5	4	9	291	4	518	4	5	22	6	2	2	2	2	5	654	4	1037	4	7	11	1052	8	0	2687	1	9	1	266	2065	710	2	10	635	14	6	3	10	2	6	4	12	6	17
Bacteria;Actinobacteria;Actinobacteria;Micrococcales;Micrococcaceae;Multi-affiliation;Multi-affiliation	OTU_1196	0	0	0	0	0	0	0	0	0	0	0	0	0	0	0	0	0	0	0	0	0	0	0	0	0	0	0	0	0	0	0	245	0	0	0	0	0	0	0	0	0	0	0	0	0	0	0	0
Bacteria;Actinobacteria;Actinobacteria;Micrococcales;Micrococcaceae;Rothia;Multi-affiliation	OTU_215	3	0	1	2	1	1	1	0	1	0	0	1267	5	0	0	0	0	0	0	8	0	3	1	2	4	2	2	0	3	0	0	0	1	1	1	0	1	1	0	0	0	3	2	0	0	1	2	0
Bacteria;Actinobacteria;Actinobacteria;Micrococcales;Micrococcaceae;Rothia;Multi-affiliation	OTU_1097	0	0	0	0	0	0	1	0	0	0	0	1	0	0	0	0	0	1	0	0	0	1	277	0	0	0	0	0	0	46	1	0	0	0	0	0	0	0	0	0	1	0	0	0	0	0	0	0
Bacteria;Actinobacteria;Actinobacteria;Micrococcales;Micrococcaceae;Rothia;unknown species	OTU_586	0	0	0	1	0	0	0	0	0	0	0	773	1	0	0	1	0	0	0	1	2	1	0	0	1	0	0	0	1	0	0	0	0	0	0	0	0	0	0	0	0	1	1	2	0	0	1	0
Bacteria;Actinobacteria;Actinobacteria;Micrococcales;Promicromonosporaceae;Isoptericola;unknown species	OTU_519	2	1	0	2	0	2	1	0	0	0	0	0	2	1	0	0	0	1	0	0	0	0	0	1	1	3	2	0	978	0	0	0	0	0	1	0	1	0	0	0	0	3	0	0	1	0	1	0
Bacteria;Actinobacteria;Actinobacteria;Propionibacteriales;Nocardioidaceae;Multi-affiliation;Multi-affiliation	OTU_654	1	0	0	0	0	1	0	0	0	3	1	0	1	1	0	0	0	0	0	0	0	1	0	0	3	1	0	0	0	0	2	0	0	0	1	0	0	0	3	0	0	1	0	0	2	0	1	0
Bacteria;Actinobacteria;Actinobacteria;Propionibacteriales;Propionibacteriaceae;Cutibacterium;Multi-affiliation	OTU_861	0	0	1	0	0	0	0	0	0	1	0	0	0	0	0	0	0	0	102	153	0	0	0	62	0	0	0	20	0	44	0	87	0	0	0	0	0	0	0	0	0	0	0	0	0	0	1	0
Bacteria;Actinobacteria;Actinobacteria;Propionibacteriales;Propionibacteriaceae;Friedmanniella;Multi-affiliation	OTU_42	8	5	8	2	2	13	6	3	4	5	5	9	14320	2	2	5	5	3	7	8	3	2	7	2	8	5	4	0	3	0	9	0	7	2	6	0	0	5	6	8	7	4	2	8	10	7	10	14
Bacteria;Actinobacteria;Actinobacteria;Propionibacteriales;Propionibacteriaceae;Granulicoccus;Multi-affiliation	OTU_557	0	0	0	0	1	0	0	0	0	0	1	1	0	0	0	2	1	0	1	1	0	1	1	0	1	0	0	0	0	0	0	0	0	0	2	0	1	1	0	0	0	1	0	0	0	0	1	2
Bacteria;Actinobacteria;Actinobacteria;Propionibacteriales;Propionibacteriaceae;Propionibacterium;unknown species	OTU_124	3	0	1	138	0	199	1	3	0	1	0	0	6	1	111	1	2	2	98	1	0	14	2	1	1	3	1	297	1	2	1	511	3	1	3	1644	0	915	1	1	1	1	1	0	0	2	1	0
Bacteria;Actinobacteria;Actinobacteria;Pseudonocardiales;Pseudonocardiaceae;Pseudonocardia;unknown species	OTU_254	2	0	1	1	1	2	3	1	0	0	1	1	2	0	0	3	0	0	3	0	3	1	0	0	1	3	0	0	0	0	0	0	0	1	0	0	0	1	22	1	0	1	1	1	0	3	1	1
Bacteria;Actinobacteria;Actinobacteria;Streptomycetales;Streptomycetaceae;Streptomyces;Multi-affiliation	OTU_1170	0	0	0	0	0	0	0	0	0	0	0	0	0	0	0	0	0	0	0	0	0	0	0	0	0	0	0	0	0	0	0	260	0	0	0	0	0	0	0	0	0	0	0	0	0	0	0	0
Bacteria;Actinobacteria;Thermoleophilia;Solirubrobacterales;Solirubrobacteraceae;Parviterribacter;Parviterribacter multiflagellatus	OTU_921	0	0	0	0	0	0	0	0	0	0	0	0	0	0	0	0	0	0	0	0	0	0	0	0	0	0	0	0	0	0	0	398	0	0	0	0	0	0	0	0	0	0	0	0	0	0	0	0
Bacteria;Aquificae;Aquificae;Hydrogenothermales;Hydrogenothermaceae;Hydrogenothermus;Persephonella sp.	OTU_323	1	0	1	1	0	0	3	0	0	0	1	0	1	1	0	0	0	0	2	1	0	0	1	1	0	0	0	0	0	0	0	0	32	0	1	0	0	0	0	3	1	337	147	1	2	1	1	4
Bacteria;Bacteroidetes;Bacteroidia;Bacteroidales;Bacteroidaceae;Bacteroides;Multi-affiliation	OTU_1212	0	0	0	0	0	1	0	0	0	0	0	1	0	1	0	0	273	0	0	0	0	0	0	0	0	0	0	0	0	0	0	0	0	0	1	0	0	0	0	0	0	0	1	0	0	0	0	0
Bacteria;Bacteroidetes;Bacteroidia;Bacteroidales;Bacteroidetes BD2-2;unknown genus;unknown species	OTU_158	0	0	1	0	1	0	2	1114	0	0	357	0	0	0	2	0	1	0	0	2	0	933	416	0	1	0	1	0	0	0	0	0	2	1	1	0	2	0	1	1	1	0	0	33	34	31	1	2
Bacteria;Bacteroidetes;Bacteroidia;Bacteroidales;Bacteroidetes BD2-2;unknown genus;unknown species	OTU_313	0	0	0	0	0	0	0	1	392	2	2	0	0	0	1	1	0	0	0	0	0	1197	2	1	0	0	0	0	1	0	0	0	0	1	0	0	1	0	2	0	1	0	0	16	20	21	0	1
Bacteria;Bacteroidetes;Bacteroidia;Bacteroidales;Bacteroidetes BD2-2;unknown genus;unknown species	OTU_330	1	1	3	1	1	1	0	0	0	0	2	1	1	2	0	102	0	0	2	1	0	0	0	1	1	1	0	0	0	0	0	0	1	1	0	0	2	0	484	810	791	1	0	1	2	0	4	1
Bacteria;Bacteroidetes;Bacteroidia;Bacteroidales;Bacteroidetes BD2-2;unknown genus;unknown species	OTU_771	0	0	0	0	0	0	1	505	0	0	0	0	1	0	0	0	0	0	0	0	2	0	0	0	0	0	0	0	0	0	0	0	0	0	0	0	0	0	0	0	0	0	0	10	11	8	0	0
Bacteria;Bacteroidetes;Bacteroidia;Bacteroidales;Bacteroidetes BD2-2;unknown genus;unknown species	OTU_775	0	1	0	0	0	0	0	507	0	0	1	0	0	1	0	0	0	0	0	0	0	1	0	0	0	1	0	0	0	0	0	0	0	0	0	0	0	0	0	0	0	0	0	13	17	14	0	1
Bacteria;Bacteroidetes;Bacteroidia;Bacteroidales;Bacteroidetes BD2-2;unknown genus;unknown species	OTU_986	0	0	0	262	0	0	0	0	0	0	116	1	1	0	0	0	0	0	0	0	0	0	0	0	0	0	0	0	0	0	0	0	0	0	0	0	0	0	0	0	0	0	0	6	6	7	1	0
Bacteria;Bacteroidetes;Bacteroidia;Bacteroidales;Bacteroidetes BD2-2;unknown genus;unknown species	OTU_1176	0	0	0	0	0	0	0	0	0	0	1	0	1	0	0	0	1	0	0	0	0	0	0	0	0	0	0	0	0	0	0	0	0	0	0	0	0	0	70	74	137	5	5	46	63	36	2	2
Bacteria;Bacteroidetes;Bacteroidia;Bacteroidales;Dysgonomonadaceae;Proteiniphilum;Multi-affiliation	OTU_54	1	1	0	105	1	3814	1	3	0	0	4	2	281	0	0	4	1	1	1	1002	1	817	1	1	4	2	0	465	1	1	1	394	2	0	3	1366	0	1951	3	1	1	2	1	2	4	1	0	3
Bacteria;Bacteroidetes;Bacteroidia;Bacteroidales;Marinifilaceae;Marinifilum;Multi-affiliation	OTU_559	1	0	0	1	0	0	0	1	0	0	0	0	0	0	1	0	1	0	0	0	0	0	1058	0	1	0	0	0	0	0	0	0	0	1	0	0	0	0	0	2	1	0	0	3	2	5	0	2
Bacteria;Bacteroidetes;Bacteroidia;Bacteroidales;Marinifilaceae;Marinifilum;Multi-affiliation	OTU_952	0	0	0	0	0	0	0	0	0	0	0	0	0	0	0	0	0	0	0	0	0	0	0	0	0	0	0	0	0	0	1	0	0	1	0	0	0	0	20	41	6	24	92	8	4	3	54	17
Bacteria;Bacteroidetes;Bacteroidia;Bacteroidales;Marinifilaceae;unknown genus;unknown species	OTU_170	3	1	1	185	0	3	0	796	1	0	1239	0	1	1	2	1	1	0	1	3	1	3	1	1	1	0	2	0	3	0	0	0	211	2	4	0	5	1	80	73	23	442	578	121	110	121	537	499
Bacteria;Bacteroidetes;Bacteroidia;Bacteroidales;Marinifilaceae;unknown genus;unknown species	OTU_539	1	0	1	0	0	0	0	2	0	0	907	0	0	1	0	0	0	0	0	0	0	0	1	0	1	0	0	0	0	0	1	0	0	0	0	0	0	0	0	0	1	0	0	11	11	15	0	0
Bacteria;Bacteroidetes;Bacteroidia;Bacteroidales;Marinifilaceae;unknown genus;unknown species	OTU_679	0	0	0	1	0	0	0	2	0	0	1	0	31	0	0	0	0	0	0	0	1	0	0	610	0	0	0	0	0	0	0	0	0	0	0	0	1	0	1	0	0	1	4	1	1	7	1	2
Bacteria;Bacteroidetes;Bacteroidia;Bacteroidales;Marinifilaceae;unknown genus;unknown species	OTU_724	0	0	362	0	0	0	0	1	0	0	211	0	0	1	0	0	0	0	0	0	0	0	1	0	0	0	14	0	0	0	0	0	1	0	0	0	0	2	1	0	0	0	0	6	5	5	0	1
Bacteria;Bacteroidetes;Bacteroidia;Bacteroidales;Marinilabiliaceae;unknown genus;unknown species	OTU_155	1	1	0	0	0	2	0	0	1	0	1	1	2	0	0	0	0	1	1	0	1	1958	1086	1	0	0	0	0	1	0	0	0	0	1	0	0	0	2	0	2	2	2	2	1	0	2	0	3
Bacteria;Bacteroidetes;Bacteroidia;Bacteroidales;Marinilabiliaceae;unknown genus;unknown species	OTU_941	0	0	0	1	0	0	0	1	0	0	0	0	0	0	0	0	0	0	269	0	0	2	96	0	0	0	0	0	0	0	0	0	0	0	0	0	0	0	0	0	1	0	0	14	20	12	0	0
Bacteria;Bacteroidetes;Bacteroidia;Bacteroidales;Paludibacteraceae;Paludibacter;unknown species	OTU_1199	0	0	0	0	0	0	0	0	0	0	0	0	0	0	0	0	0	0	0	0	0	284	0	0	0	0	0	0	0	0	0	0	0	0	0	0	0	0	0	0	0	0	0	0	0	0	0	0
Bacteria;Bacteroidetes;Bacteroidia;Bacteroidales;Porphyromonadaceae;Porphyromonas;unknown species	OTU_801	0	0	0	0	0	0	0	0	0	1	0	0	1	0	0	0	0	0	0	0	0	0	1	0	0	0	0	90	0	0	0	28	2	0	0	0	0	1	0	0	0	0	0	1	0	0	0	0
Bacteria;Bacteroidetes;Bacteroidia;Bacteroidales;Prevotellaceae;Prevotella 7;unknown species	OTU_937	0	0	0	0	0	0	0	0	0	0	0	0	0	0	0	0	0	0	0	0	0	0	0	0	0	0	0	75	0	0	0	53	0	0	0	261	0	0	0	0	0	0	0	0	0	0	0	0
Bacteria;Bacteroidetes;Bacteroidia;Bacteroidales;Prevotellaceae;Prevotella;Multi-affiliation	OTU_1214	0	0	0	0	0	0	1	0	0	0	0	0	0	0	0	0	0	0	0	0	0	0	0	0	0	0	1	0	0	0	0	0	0	0	0	0	0	1	0	1	0	0	0	0	0	0	0	0
Bacteria;Bacteroidetes;Bacteroidia;Bacteroidales;Prevotellaceae;Prevotella;Prevotella bivia	OTU_1178	0	0	0	0	0	317	0	0	0	0	1	0	0	0	0	0	0	0	0	0	0	0	0	0	0	0	0	0	0	0	0	0	0	0	0	0	0	0	0	0	0	0	0	0	1	0	0	0
Bacteria;Bacteroidetes;Bacteroidia;Bacteroidales;Prolixibacteraceae;Draconibacterium;unknown species	OTU_1204	0	0	0	0	0	0	0	0	0	0	0	0	0	0	0	0	0	0	0	0	0	0	0	0	1	0	0	0	0	0	0	0	0	0	0	0	2	0	2	4	1	3	16	64	77	65	12	8
Bacteria;Bacteroidetes;Bacteroidia;Bacteroidales;Prolixibacteraceae;Roseimarinus;unknown species	OTU_431	0	0	0	1	0	0	0	0	1	0	0	0	0	0	1	1	0	0	0	2	1	1	0	0	0	0	0	0	0	0	0	0	0	0	1	0	0	1	1	1	1	39	1116	1	1	0	0	0
Bacteria;Bacteroidetes;Bacteroidia;Bacteroidales;Rikenellaceae;Blvii28 wastewater-sludge group;unknown species	OTU_1329	0	0	0	0	0	0	0	0	0	0	0	1	0	0	0	0	0	0	0	1	0	0	0	0	0	0	0	0	0	0	0	0	0	0	0	0	1	0	0	3	0	92	72	0	0	2	56	50
Bacteria;Bacteroidetes;Bacteroidia;Bacteroidales;Salinivirgaceae;Multi-affiliation;Multi-affiliation	OTU_102	0	1	0	1028	0	1	0	276	3	0	157	0	1	1	0	0	2	0	0	0	1	2	486	2680	1	2	0	0	0	0	1	0	1	2	1	0	1	2	1	5	1	11	47	70	77	63	4	4
Bacteria;Bacteroidetes;Bacteroidia;Bacteroidales;SB-5;unknown genus;unknown species	OTU_287	1	0	0	1	0	0	0	2	0	0	1	0	1	0	0	0	0	2	0	2	0	1	1	1	3	1	0	0	2	0	0	0	3	1	1	0	0	1	263	372	138	78	95	390	439	372	244	216
Bacteria;Bacteroidetes;Bacteroidia;Bacteroidales;SB-5;unknown genus;unknown species	OTU_671	0	0	0	1	1	0	0	0	0	0	0	1	0	0	0	0	0	0	0	0	0	0	0	0	1	0	0	0	0	0	0	0	0	0	0	0	0	0	1	1	0	1	0	200	253	174	0	1
Bacteria;Bacteroidetes;Bacteroidia;Bacteroidales;SB-5;unknown genus;unknown species	OTU_758	0	1	126	0	0	0	0	313	0	1	67	0	0	1	0	0	1	0	1	1	0	0	0	0	1	1	6	0	0	0	0	0	0	0	0	0	1	0	2	0	0	0	2	21	13	6	0	0
Bacteria;Bacteroidetes;Bacteroidia;Bacteroidetes VC2.1 Bac22;unknown family;unknown genus;unknown species	OTU_40	7	870	240	531	2	3	8	2744	2	4	374	3	8	3	2	6	2	2	7	2	2	800	328	552	1095	994	13	0	1	0	3	0	5	1497	5	0	5	2	9	4	5	10	2	1706	1961	1565	3	6
Bacteria;Bacteroidetes;Bacteroidia;Bacteroidetes VC2.1 Bac22;unknown family;unknown genus;unknown species	OTU_139	1	0	0	3	0	0	0	0	0	0	1	0	0	0	1	1	0	0	2	3	0	2	0	1	2	1	1	0	1	0	1	0	0	1	1	0	3	0	3	13	234	1725	1271	6	1	2	1	4
Bacteria;Bacteroidetes;Bacteroidia;Bacteroidetes VC2.1 Bac22;unknown family;unknown genus;unknown species	OTU_176	1	0	319	0	1	1	4	5	1	0	494	1	0	0	0	0	0	0	2	1	0	1	0	1053	0	0	19	0	0	0	0	0	1	0	3	0	1	0	4	1	0	2	0	231	241	238	1	2
Bacteria;Bacteroidetes;Bacteroidia;Bacteroidetes VC2.1 Bac22;unknown family;unknown genus;unknown species	OTU_212	0	0	0	1	1	1	0	0	0	0	481	0	0	0	1	0	0	0	1	0	1	1	2	314	0	0	0	0	0	0	0	0	0	0	0	0	1	0	1	1	2	3	1	444	550	408	0	2
Bacteria;Bacteroidetes;Bacteroidia;Bacteroidetes VC2.1 Bac22;unknown family;unknown genus;unknown species	OTU_252	0	0	0	0	0	0	1	0	0	1	0	0	1	2	0	1	0	0	2	0	2	1	3	0	2	5	1	0	0	0	0	0	1	4	0	0	0	0	565	504	143	179	312	11	23	11	27	29
Bacteria;Bacteroidetes;Bacteroidia;Bacteroidetes VC2.1 Bac22;unknown family;unknown genus;unknown species	OTU_315	0	0	0	0	0	0	0	382	0	0	454	0	1	247	0	2	0	0	1	1	0	0	428	0	0	0	0	0	0	0	0	0	0	0	0	0	1	1	3	0	0	1	1	75	63	52	1	0
Bacteria;Bacteroidetes;Bacteroidia;Bacteroidetes VC2.1 Bac22;unknown family;unknown genus;unknown species	OTU_532	1	0	0	1	0	0	1	1	0	0	0	1	0	686	0	0	0	0	0	0	0	0	1	2	0	1	0	0	1	0	0	0	0	1	1	0	1	0	0	0	0	0	0	86	79	65	0	0
Bacteria;Bacteroidetes;Bacteroidia;Bacteroidetes VC2.1 Bac22;unknown family;unknown genus;unknown species	OTU_669	0	0	0	0	0	0	0	154	0	0	0	0	2	0	0	0	0	0	480	0	0	2	0	1	0	0	0	0	0	0	0	0	1	1	0	0	0	0	0	2	0	1	0	82	104	83	1	0
Bacteria;Bacteroidetes;Bacteroidia;Bacteroidetes VC2.1 Bac22;unknown family;unknown genus;unknown species	OTU_700	0	1	0	0	0	0	0	208	0	0	0	0	0	0	0	0	1	0	0	0	0	0	1	0	0	1	0	0	0	0	1	0	0	0	1	0	1	0	18	31	13	74	110	79	104	84	20	14
Bacteria;Bacteroidetes;Bacteroidia;Bacteroidetes VC2.1 Bac22;unknown family;unknown genus;unknown species	OTU_913	0	0	0	0	0	0	0	0	0	0	254	0	0	0	1	0	0	0	0	0	0	0	0	0	0	0	0	0	1	0	0	0	0	0	0	0	0	0	0	0	1	1	0	44	65	52	0	0
Bacteria;Bacteroidetes;Bacteroidia;Bacteroidetes VC2.1 Bac22;unknown family;unknown genus;unknown species	OTU_1210	0	0	0	0	0	0	0	0	0	0	0	0	0	0	0	0	0	0	0	0	1	0	0	0	0	0	0	0	1	0	1	0	0	0	0	0	0	0	0	0	0	1	0	87	103	77	1	0
Bacteria;Bacteroidetes;Bacteroidia;Bacteroidetes VC2.1 Bac22;unknown family;unknown genus;unknown species	OTU_1261	0	0	0	0	0	0	0	0	0	0	190	1	1	0	0	0	0	1	0	0	0	0	1	0	1	1	0	0	0	0	0	0	0	0	0	0	0	0	0	0	0	0	1	23	30	12	0	0
Bacteria;Bacteroidetes;Bacteroidia;Bacteroidetes VC2.1 Bac22;unknown family;unknown genus;unknown species	OTU_1289	0	0	0	0	0	0	0	0	0	0	0	0	1	1	0	125	0	0	0	0	0	0	0	1	0	0	0	0	0	0	0	0	0	0	0	0	0	0	1	0	1	1	4	24	48	40	1	0
Bacteria;Bacteroidetes;Bacteroidia;Chitinophagales;Saprospiraceae;Lewinella;unknown species	OTU_407	1	1	0	1	0	0	2	0	0	2	0	0	0	0	0	0	0	1	1	0	0	1	0	0	1	1	0	0	0	0	1	0	0	1	0	0	1	0	5	1	4	0	3	0	1	1	2	2
Bacteria;Bacteroidetes;Bacteroidia;Chitinophagales;Saprospiraceae;Lewinella;unknown species	OTU_859	0	0	0	0	0	1	0	0	0	0	0	0	0	0	0	0	441	1	0	0	1	1	0	0	2	0	0	0	0	0	0	0	0	0	0	0	0	0	3	0	0	0	1	0	0	0	0	0
Bacteria;Bacteroidetes;Bacteroidia;Chitinophagales;Saprospiraceae;Portibacter;unknown species	OTU_1198	1	0	0	0	0	0	0	0	0	0	0	0	0	0	0	0	0	0	0	0	0	0	0	0	2	0	0	0	0	0	0	0	0	0	0	0	294	0	0	0	0	0	0	0	0	0	0	0
Bacteria;Bacteroidetes;Bacteroidia;Chitinophagales;Saprospiraceae;unknown genus;unknown species	OTU_738	0	2	0	0	0	1	1	0	0	0	0	0	0	0	0	1	0	0	1	615	0	0	1	0	1	0	0	0	0	0	1	0	0	0	0	0	2	0	0	0	0	0	0	0	0	0	0	0
Bacteria;Bacteroidetes;Bacteroidia;Chitinophagales;Saprospiraceae;unknown genus;unknown species	OTU_1086	0	0	0	0	0	0	0	0	0	0	0	0	0	0	0	0	0	0	0	0	0	0	0	0	0	0	0	0	1	0	0	0	0	0	0	0	1	0	21	17	44	3	36	37	43	42	29	24
Bacteria;Bacteroidetes;Bacteroidia;Chitinophagales;Saprospiraceae;unknown genus;unknown species	OTU_1203	0	0	0	0	0	1	0	0	0	0	0	0	0	0	0	0	0	0	0	0	0	0	0	0	0	0	1	0	0	0	1	0	0	0	0	0	0	0	36	14	53	2	6	54	55	45	0	0
Bacteria;Bacteroidetes;Bacteroidia;Chitinophagales;unknown family;unknown genus;unknown species	OTU_318	2	0	0	0	0	1	0	1	0	0	0	0	2	0	0	1	1	0	1	0	1	0	0	0	0	0	0	0	1	0	0	0	0	0	0	0	0	1	1	0	1	1	2	2	0	1	1	2
Bacteria;Bacteroidetes;Bacteroidia;Cytophagales;Amoebophilaceae;unknown genus;metagenome	OTU_130	0	1	0	1	0	1	1	1	0	0	1	1	3559	0	0	1	0	0	3	0	0	1	1	0	2	0	1	0	2	0	1	0	0	1	2	0	0	0	2	1	0	1	0	2	1	0	2	2
Bacteria;Bacteroidetes;Bacteroidia;Cytophagales;Amoebophilaceae;unknown genus;unknown species	OTU_178	0	0	0	0	0	0	0	0	0	0	2	2	1	0	0	2623	2	1	0	3	1	0	2	1	1	0	0	0	2	0	0	0	1	0	1	0	1	0	0	0	1	2	1	2	0	1	1	2
Bacteria;Bacteroidetes;Bacteroidia;Cytophagales;Amoebophilaceae;unknown genus;unknown species	OTU_752	0	1	0	0	0	0	0	0	0	0	0	1	0	0	0	562	0	0	0	0	1	0	0	0	1	1	0	0	0	0	0	0	0	0	0	0	0	0	0	0	0	1	0	0	0	0	0	0
Bacteria;Bacteroidetes;Bacteroidia;Cytophagales;Amoebophilaceae;unknown genus;unknown species	OTU_1234	0	0	0	0	0	0	0	0	0	0	0	0	0	0	0	0	0	0	0	0	0	0	0	0	0	0	0	0	0	0	0	0	0	0	0	0	272	0	0	0	0	0	1	0	0	1	0	1
Bacteria;Bacteroidetes;Bacteroidia;Cytophagales;Cyclobacteriaceae;Fabibacter;Multi-affiliation	OTU_412	0	0	0	1	0	0	0	1	0	0	0	0	4	0	0	1	0	0	0	0	0	1	1	0	1	1318	0	0	0	0	0	0	0	1	0	0	0	0	2	1	2	1	0	1	2	1	2	1
Bacteria;Bacteroidetes;Bacteroidia;Cytophagales;Cyclobacteriaceae;Fulvivirga;Sphingobacteriales bacterium KIY	OTU_1250	0	0	0	0	0	0	0	0	0	0	0	1	1	0	0	268	0	0	0	0	0	0	0	0	0	0	0	0	0	0	0	0	0	0	0	0	0	0	0	1	0	0	0	0	1	0	0	0
Bacteria;Bacteroidetes;Bacteroidia;Cytophagales;Cyclobacteriaceae;Marinoscillum;unknown species	OTU_359	2	0	0	2	0	1	2	0	0	0	0	0	2	0	0	0	0	0	0	3	0	1	0	1	0	1	0	0	3	0	0	0	0	0	0	0	0	0	1	1	4	6	17	1	0	1	6	9
Bacteria;Bacteroidetes;Bacteroidia;Cytophagales;Cyclobacteriaceae;Marinoscillum;unknown species	OTU_403	0	0	0	0	0	0	1	2	0	0	1	0	1	0	0	0	0	0	1	0	0	3	0	0	0	1	0	0	1	0	1	0	1	2	1	0	0	0	0	0	2	1	0	1	1	0	1	0
Bacteria;Bacteroidetes;Bacteroidia;Cytophagales;Cyclobacteriaceae;unknown genus;unknown species	OTU_299	0	0	1	1	0	0	0	2	0	0	1	1731	2	0	1	1	0	0	0	0	0	1	1	1	0	0	0	0	0	0	0	0	0	0	1	0	0	0	1	2	4	2	3	23	39	26	3	3
Bacteria;Bacteroidetes;Bacteroidia;Cytophagales;Cyclobacteriaceae;unknown genus;unknown species	OTU_351	0	0	0	0	0	0	0	0	0	1	0	1	2	0	0	0	1	0	0	2	0	0	0	1	1	2	0	0	1	0	0	0	1	1	0	0	72	2	217	182	95	108	188	0	7	2	196	142
Bacteria;Bacteroidetes;Bacteroidia;Cytophagales;Cyclobacteriaceae;unknown genus;unknown species	OTU_379	1	0	0	0	0	2	0	1	0	0	1	1	1	0	0	0	0	0	1	1	0	0	1	0	1	0	0	0	1346	0	1	0	1	0	0	0	1	1	3	6	7	1	0	0	5	3	0	0
Bacteria;Bacteroidetes;Bacteroidia;Cytophagales;Flammeovirgaceae;Flammeovirga;Flammeovirga yaeyamensis	OTU_193	1	1	1	1	0	0	0	0	0	0	0	1	1	1	1	0	0	0	0	1	0	0	1	0	2	2	7	0	0	0	0	0	0	0	2	0	1	1	0	0	0	1	0	0	0	2	0	2
Bacteria;Bacteroidetes;Bacteroidia;Cytophagales;Hymenobacteraceae;Pontibacter;Pontibacter humi	OTU_1057	0	0	0	0	0	0	0	2	0	0	0	0	0	319	0	0	0	1	0	0	0	0	0	0	0	1	0	0	0	0	0	0	0	0	0	0	0	0	1	0	0	0	0	0	1	0	0	0
Bacteria;Bacteroidetes;Bacteroidia;Flavobacteriales;Crocinitomicaceae;Crocinitomix;unknown species	OTU_822	0	0	0	0	0	0	0	0	0	0	1	0	0	0	0	0	0	0	0	0	1	0	334	0	1	0	0	0	0	0	0	0	0	0	0	0	0	0	1	1	0	1	0	0	0	0	0	0
Bacteria;Bacteroidetes;Bacteroidia;Flavobacteriales;Crocinitomicaceae;Crocinitomix;unknown species	OTU_1426	0	0	0	0	0	0	0	0	0	0	0	0	0	0	0	0	0	0	0	0	0	0	0	0	0	0	0	0	0	0	0	0	1	0	0	0	0	0	0	0	1	1	0	0	1	2	0	0
Bacteria;Bacteroidetes;Bacteroidia;Flavobacteriales;Crocinitomicaceae;Crocinitomix;unknown species	OTU_1496	0	0	0	0	0	0	0	0	0	0	0	0	0	0	0	1	1	0	0	0	0	0	0	0	0	0	0	0	0	0	0	0	0	1	0	0	0	0	0	1	1	0	0	1	0	2	0	0
Bacteria;Bacteroidetes;Bacteroidia;Flavobacteriales;Crocinitomicaceae;Fluviicola;unknown species	OTU_120	0	0	1	3	0	1	2	1	0	0	2	3	1	0	0	0	1	1	4	0	0	1	2	1	1	1	1	0	1	0	0	0	4	1	0	0	3	0	2	2	0	3	5	1	1	3	2	2
Bacteria;Bacteroidetes;Bacteroidia;Flavobacteriales;Crocinitomicaceae;Fluviicola;unknown species	OTU_141	1	0	6	0	0	2	0	1	0	1	1	2	0	0	0	0	0	0	0	0	1	0	0	0	1	1	9	0	0	0	1	0	3	4	0	0	1	1	1	2	2	1	1	3	1	2	1	0
Bacteria;Bacteroidetes;Bacteroidia;Flavobacteriales;Crocinitomicaceae;Fluviicola;unknown species	OTU_196	1	0	1	1	0	1	2	0	0	0	1	1	0	0	0	1	0	1	0	0	0	0	0	0	1	0	1	0	2	0	0	0	3	0	0	0	1	0	0	1	0	0	3	1	0	5	1	1
Bacteria;Bacteroidetes;Bacteroidia;Flavobacteriales;Crocinitomicaceae;Fluviicola;unknown species	OTU_1163	0	0	0	0	0	0	0	0	0	0	0	0	0	0	0	0	0	0	0	0	0	0	0	0	0	0	0	0	0	0	0	0	0	0	1	0	184	0	1	2	1	3	22	2	3	1	15	8
Bacteria;Bacteroidetes;Bacteroidia;Flavobacteriales;Cryomorphaceae;NS10 marine group;unknown species	OTU_599	0	0	0	0	0	0	0	0	0	1	0	0	1	0	0	0	0	0	2	0	0	0	1	0	2	0	0	0	1	0	1	0	0	1	0	0	0	0	207	287	231	2	4	0	1	1	1	0
Bacteria;Bacteroidetes;Bacteroidia;Flavobacteriales;Cryomorphaceae;NS10 marine group;unknown species	OTU_933	0	0	0	0	0	1	0	0	0	0	0	0	1	0	0	0	1	0	0	0	0	0	0	0	0	0	0	0	0	0	0	0	0	0	0	0	0	0	0	0	0	0	0	0	0	0	0	0
Bacteria;Bacteroidetes;Bacteroidia;Flavobacteriales;Cryomorphaceae;NS10 marine group;unknown species	OTU_979	0	0	0	0	0	0	0	0	0	0	0	0	0	0	0	0	0	1	0	0	0	0	0	0	0	0	0	0	0	0	0	0	0	0	0	0	386	0	0	0	0	0	1	0	0	0	0	3
Bacteria;Bacteroidetes;Bacteroidia;Flavobacteriales;Cryomorphaceae;unknown genus;Multi-affiliation	OTU_537	0	0	0	0	0	0	0	0	0	0	0	0	0	0	0	0	0	0	0	0	1	0	0	0	0	2	0	0	0	0	0	0	0	1	0	0	0	0	0	0	0	1	0	0	0	0	0	0
Bacteria;Bacteroidetes;Bacteroidia;Flavobacteriales;Cryomorphaceae;unknown genus;Multi-affiliation	OTU_999	0	0	0	0	0	0	0	0	0	0	0	0	0	0	0	0	0	0	0	0	0	0	0	0	0	0	0	0	0	0	0	0	0	0	0	0	0	0	0	0	1	0	0	0	1	0	0	0
Bacteria;Bacteroidetes;Bacteroidia;Flavobacteriales;Cryomorphaceae;unknown genus;unknown species	OTU_57	4	2	3	2	1	5	2	3	0	2	2	1	2	1	3	2	0	1	3	2	3	821	2	2	7	4	0	0	1	0	0	0	6	6	3	0	3	1	3	3	5	6	4	6	4	7	7	5
Bacteria;Bacteroidetes;Bacteroidia;Flavobacteriales;Cryomorphaceae;unknown genus;unknown species	OTU_266	0	0	0	0	0	1	0	0	0	0	0	1	0	0	1	0	0	1	1	0	0	1	0	2	0	1	0	0	0	0	0	0	1	0	1	0	1	0	5	0	1	0	1	0	0	0	0	0
Bacteria;Bacteroidetes;Bacteroidia;Flavobacteriales;Cryomorphaceae;unknown genus;unknown species	OTU_790	0	0	0	0	0	0	0	0	0	1	0	1	0	0	0	0	0	0	0	1	0	0	0	0	268	0	0	0	0	0	0	0	0	0	0	0	0	0	0	0	0	0	5	4	1	3	0	0
Bacteria;Bacteroidetes;Bacteroidia;Flavobacteriales;Cryomorphaceae;unknown genus;unknown species	OTU_1050	0	0	0	0	0	0	1	0	0	0	0	0	0	0	0	0	0	0	0	0	0	0	1	1	0	0	0	0	0	0	0	0	0	0	0	0	356	0	2	0	0	3	7	0	0	0	7	3
Bacteria;Bacteroidetes;Bacteroidia;Flavobacteriales;Cryomorphaceae;unknown genus;unknown species	OTU_1373	0	0	0	0	0	0	0	0	0	0	0	0	0	0	0	1	0	0	0	1	0	0	0	0	1	0	0	0	0	0	0	0	0	0	0	0	248	0	0	0	0	0	1	0	0	0	0	0
Bacteria;Bacteroidetes;Bacteroidia;Flavobacteriales;Flavobacteriaceae;Actibacter;unknown species	OTU_101	5	1	2	3	0	3	811	107	918	5	449	1	2	5	2	0	2	1	2	3	1	5	425	3	8	3	3	0	3	0	3	0	5	1	10	0	731	0	245	211	265	243	545	155	239	177	96	52
Bacteria;Bacteroidetes;Bacteroidia;Flavobacteriales;Flavobacteriaceae;Aquibacter;unknown species	OTU_786	1	0	0	0	0	1	0	1	0	0	0	1	0	0	0	0	0	0	0	1	0	0	0	0	0	0	0	0	0	0	0	0	0	1	0	0	1	0	85	55	56	55	84	1	4	3	46	49
Bacteria;Bacteroidetes;Bacteroidia;Flavobacteriales;Flavobacteriaceae;Aquibacter;unknown species	OTU_1106	0	1	0	0	0	0	0	0	0	0	0	0	0	0	0	0	0	0	0	0	0	1	0	0	0	1	0	0	0	0	0	0	0	0	0	0	1	0	16	5	12	91	164	11	26	26	5	10
Bacteria;Bacteroidetes;Bacteroidia;Flavobacteriales;Flavobacteriaceae;Aquibacter;unknown species	OTU_1240	0	0	0	0	0	1	1	2	0	0	66	1	0	0	0	0	0	1	0	1	0	0	0	0	0	0	0	0	1	0	0	0	0	0	0	0	152	0	5	1	4	11	14	4	7	6	0	0
Bacteria;Bacteroidetes;Bacteroidia;Flavobacteriales;Flavobacteriaceae;Arcticiflavibacter;unknown species	OTU_713	0	0	1	1	1	0	0	0	1	1	1	0	1	0	0	2	0	0	0	1	0	1	0	1	1	1	0	0	0	0	0	0	0	0	0	0	0	0	0	1	5	0	2	157	220	168	0	2
Bacteria;Bacteroidetes;Bacteroidia;Flavobacteriales;Flavobacteriaceae;Aurantivirga;Multi-affiliation	OTU_108	1	0	0	2	0	0	0	2	1	2	1	0	2	1	1	1	1	2	0	3	1	1	2	1	2	1	2	0	1	0	1	0	26	1	1	0	2	1	1	3	2	2	6	2	4	4	1	3
Bacteria;Bacteroidetes;Bacteroidia;Flavobacteriales;Flavobacteriaceae;Eudoraea;Eudoraea chungangensis	OTU_907	1	0	0	0	1	0	0	1	0	0	0	0	0	1	0	0	0	0	0	0	0	0	0	0	0	0	0	0	0	0	0	0	0	0	0	0	0	0	44	20	68	14	95	22	34	35	17	27
Bacteria;Bacteroidetes;Bacteroidia;Flavobacteriales;Flavobacteriaceae;Eudoraea;unknown species	OTU_1162	0	0	0	0	0	1	0	0	1	0	0	1	0	0	0	0	0	0	0	0	0	0	0	1	0	0	0	0	0	0	0	0	0	0	0	0	0	0	91	56	118	5	3	3	3	4	3	0
Bacteria;Bacteroidetes;Bacteroidia;Flavobacteriales;Flavobacteriaceae;Formosa;Multi-affiliation	OTU_133	1	1	1	0	0	1	1	2	0	2	1	0	0	1	2	0	1	0	0	0	1	0	0	0	3	581	0	0	0	0	2	0	0	0	1	0	2	2	2	1	3	2	3	4	0	3	1	2
Bacteria;Bacteroidetes;Bacteroidia;Flavobacteriales;Flavobacteriaceae;Formosa;Multi-affiliation	OTU_347	2	0	1	1	0	0	0	1	0	0	0	0	1	0	1	1	0	1	0	1	0	0	0	0	0	2	2	0	0	0	0	0	0	0	0	0	2	1	1	0	0	5	4	2	3	4	0	0
Bacteria;Bacteroidetes;Bacteroidia;Flavobacteriales;Flavobacteriaceae;Formosa;Multi-affiliation	OTU_660	0	0	0	0	1	0	0	0	1	0	0	0	0	0	0	0	0	0	0	0	0	0	0	0	0	1	0	0	0	0	0	0	0	0	0	0	1	1	1	0	1	0	0	0	0	0	0	4
Bacteria;Bacteroidetes;Bacteroidia;Flavobacteriales;Flavobacteriaceae;Formosa;unknown species	OTU_438	1	0	0	0	0	0	0	1	0	1	0	1	1	1	0	0	0	1	1	0	1	1	0	2	0	645	0	0	1	0	0	0	2	0	0	0	0	0	1	0	1	1	0	0	2	0	1	1
Bacteria;Bacteroidetes;Bacteroidia;Flavobacteriales;Flavobacteriaceae;Lutibacter;Croceimarina litoralis	OTU_963	0	0	0	0	0	0	0	1	0	0	0	0	0	0	1	0	1	0	0	0	0	0	0	1	0	0	0	0	0	0	0	0	0	0	0	0	271	0	56	64	85	1	1	0	1	0	0	0
Bacteria;Bacteroidetes;Bacteroidia;Flavobacteriales;Flavobacteriaceae;Lutibacter;unknown species	OTU_387	0	0	2	0	1	0	3	0	0	0	3	0	0	0	0	69	0	3	2	0	0	0	2	1	0	1	0	0	0	0	0	0	0	1	0	0	1	0	337	420	455	2	4	1	0	0	1	1
Bacteria;Bacteroidetes;Bacteroidia;Flavobacteriales;Flavobacteriaceae;Maritimimonas;unknown species	OTU_164	1	0	2	571	0	0	1	276	0	0	515	0	2	0	0	2	0	0	0	3	1	0	758	0	0	1	0	0	0	0	0	0	2	2	0	0	0	1	1	2	0	3	0	246	257	215	2	0
Bacteria;Bacteroidetes;Bacteroidia;Flavobacteriales;Flavobacteriaceae;Maritimimonas;unknown species	OTU_987	0	0	0	0	0	0	0	0	0	0	0	0	0	0	0	0	0	0	0	0	0	1	0	223	0	0	0	0	0	0	0	0	0	0	0	0	0	0	0	0	0	1	0	45	54	46	0	0
Bacteria;Bacteroidetes;Bacteroidia;Flavobacteriales;Flavobacteriaceae;Mesoflavibacter;unknown species	OTU_1002	1	0	0	0	0	1	0	0	0	0	0	0	0	0	0	51	0	0	0	0	0	1	0	0	0	0	0	0	0	0	0	0	0	0	0	0	0	0	63	31	53	8	19	39	44	39	3	5
Bacteria;Bacteroidetes;Bacteroidia;Flavobacteriales;Flavobacteriaceae;Multi-affiliation;Multi-affiliation	OTU_836	1	0	0	0	0	0	1	0	0	0	1	0	0	0	0	0	0	0	0	0	0	0	1	0	407	2	0	0	0	0	0	0	0	1	0	0	1	1	3	0	6	2	9	16	24	22	1	2
Bacteria;Bacteroidetes;Bacteroidia;Flavobacteriales;Flavobacteriaceae;Multi-affiliation;Multi-affiliation	OTU_895	1	0	0	0	1	0	1	2	0	0	0	0	0	0	0	0	0	0	0	2	0	0	1	237	1	0	0	0	0	0	0	1	1	0	0	0	1	1	53	38	36	59	234	9	34	38	28	23
Bacteria;Bacteroidetes;Bacteroidia;Flavobacteriales;Flavobacteriaceae;Muricauda;Muricauda sp.	OTU_1324	0	0	0	0	0	1	0	0	0	0	0	0	0	0	0	0	1	0	0	0	0	0	0	0	0	0	0	0	0	0	0	0	0	0	0	0	0	0	9	64	10	90	71	1	0	0	0	0
Bacteria;Bacteroidetes;Bacteroidia;Flavobacteriales;Flavobacteriaceae;Myroides;Myroides odoratimimus	OTU_397	1320	0	0	0	0	0	0	0	0	1	0	0	1	0	0	0	0	0	0	3	0	2	1	0	0	0	1	0	0	0	1	0	0	0	0	0	0	0	0	0	0	0	0	1	0	0	1	0
Bacteria;Bacteroidetes;Bacteroidia;Flavobacteriales;Flavobacteriaceae;NS2b marine group;unknown species	OTU_48	4	2	2	1	1	3	1	5	0	1	3	2	1	1	2	2	2	0	2	2	2	5	3	3	4	2	0	0	1	0	0	0	3	0	1	0	5	1	1	0	0	2	1	5	9	10	0	4
Bacteria;Bacteroidetes;Bacteroidia;Flavobacteriales;Flavobacteriaceae;NS2b marine group;unknown species	OTU_150	2	0	0	2	0	1	1	2	0	1	0	2	0	1	1	0	0	0	1	1	1	0	0	0	1	0	1	0	0	0	1	0	2	0	1	0	3	1	0	1	0	1	2	3	1	2	1	2
Bacteria;Bacteroidetes;Bacteroidia;Flavobacteriales;Flavobacteriaceae;NS4 marine group;marine metagenome	OTU_59	3	1	0	4	0	1	4	2	0	2	4	3	5	1	0	166	3	2	4	4	2	2	2	4	11	548	1	0	4	0	1	0	4	4	1	0	4	3	11	6	2	8	4	2	9	1	4	6
Bacteria;Bacteroidetes;Bacteroidia;Flavobacteriales;Flavobacteriaceae;NS4 marine group;Multi-affiliation	OTU_754	0	0	0	1	0	0	0	0	0	1	0	1	1	0	0	0	0	0	0	0	0	1	2	0	0	0	0	0	0	0	0	0	1	0	0	0	0	0	0	0	0	0	0	0	0	0	1	0
Bacteria;Bacteroidetes;Bacteroidia;Flavobacteriales;Flavobacteriaceae;NS4 marine group;unknown species	OTU_72	2	0	1	2	0	2	2	2	2	1	2	0	5	2	0	3	2	2	1	1	1	2	4	0	1	5	2	0	2	0	1	0	1	1	1	0	3	1	4	3	2	2	0	4	4	2	1	1
Bacteria;Bacteroidetes;Bacteroidia;Flavobacteriales;Flavobacteriaceae;NS4 marine group;unknown species	OTU_135	2	1	0	2	0	0	1	3	0	0	1	0	2	0	0	0	0	1	0	0	0	1	1	0	0	1	0	0	0	0	1	0	1	1	1	0	0	2	2	0	2	3	0	1	3	3	0	0
Bacteria;Bacteroidetes;Bacteroidia;Flavobacteriales;Flavobacteriaceae;NS4 marine group;unknown species	OTU_626	0	0	0	0	0	1	0	0	0	0	4	0	1	0	0	0	0	0	0	0	0	0	0	0	0	2	0	0	0	0	0	0	0	0	0	0	0	0	0	0	0	2	0	1	0	0	1	1
Bacteria;Bacteroidetes;Bacteroidia;Flavobacteriales;Flavobacteriaceae;NS4 marine group;unknown species	OTU_879	0	0	0	0	0	0	0	0	1	0	0	0	0	0	0	0	0	0	0	0	0	0	0	0	0	0	0	0	0	0	0	0	0	0	0	0	0	0	0	0	0	0	1	0	0	1	0	1
Bacteria;Bacteroidetes;Bacteroidia;Flavobacteriales;Flavobacteriaceae;NS4 marine group;unknown species	OTU_1139	0	0	0	0	0	0	0	0	0	0	0	0	0	0	0	0	0	0	0	1	0	0	0	0	0	1	0	0	0	0	0	0	0	0	0	0	0	0	0	0	0	0	0	1	0	0	0	0
Bacteria;Bacteroidetes;Bacteroidia;Flavobacteriales;Flavobacteriaceae;NS5 marine group;Multi-affiliation	OTU_335	1	0	2	0	0	3	1	1	0	0	0	0	0	0	0	0	0	1	0	0	0	1	1	0	1	0	0	0	0	0	0	0	0	1	0	0	0	0	1	0	1	1	0	1	2	0	0	1
Bacteria;Bacteroidetes;Bacteroidia;Flavobacteriales;Flavobacteriaceae;NS5 marine group;unknown species	OTU_61	3	1	1	1	0	1	2	4	1	2	2	2	1	1	0	2	1	3	1	3	2	1	4	2	6	2	1	0	2	0	2	0	5	2	1	0	1	2	3	3	9	0	5	2	2	3	5	3
Bacteria;Bacteroidetes;Bacteroidia;Flavobacteriales;Flavobacteriaceae;NS5 marine group;unknown species	OTU_77	6	0	1	3	0	5	0	3	0	2	1	3	3	2	0	3	0	0	2	3	1	0	3	2	3	3	2	0	1	0	0	0	0	0	2	0	2	0	6	5	5	3	4	4	1	2	0	0
Bacteria;Bacteroidetes;Bacteroidia;Flavobacteriales;Flavobacteriaceae;NS5 marine group;unknown species	OTU_122	1	1	1	1	0	1	2	0	0	1	1	0	0	0	1	1	1	2	1	2	2	1	0	0	5	1	0	0	1	0	1	0	3	0	2	0	1	0	8	0	3	4	1	4	0	5	3	1
Bacteria;Bacteroidetes;Bacteroidia;Flavobacteriales;Flavobacteriaceae;NS5 marine group;unknown species	OTU_151	0	0	1	0	1	1	2	0	0	0	2	3	0	0	0	0	0	0	1	1	1	1	0	0	2	3	0	0	0	0	0	0	0	0	2	0	2	0	3	0	4	3	0	2	3	0	2	1
Bacteria;Bacteroidetes;Bacteroidia;Flavobacteriales;Flavobacteriaceae;NS5 marine group;unknown species	OTU_182	0	1	1	0	0	3	0	0	2	3	2	0	2	1	0	0	1	1	0	0	0	0	1	0	1	2	0	0	0	0	1	0	1	4	1	0	0	0	1	0	0	0	1	0	0	1	0	1
Bacteria;Bacteroidetes;Bacteroidia;Flavobacteriales;Flavobacteriaceae;NS5 marine group;unknown species	OTU_284	0	0	0	1	0	0	0	0	0	1	1	0	0	1	0	2	0	0	0	0	0	0	0	0	3	0	1	0	0	0	0	0	1	2	0	0	0	1	0	3	0	0	0	2	1	0	2	0
Bacteria;Bacteroidetes;Bacteroidia;Flavobacteriales;Flavobacteriaceae;NS5 marine group;unknown species	OTU_448	0	0	3	1	0	0	0	2	0	1	0	0	1	0	0	0	1	0	1	1	0	0	1	0	1	0	0	0	0	0	0	0	0	0	0	0	0	0	1	1	0	2	2	0	1	0	0	1
Bacteria;Bacteroidetes;Bacteroidia;Flavobacteriales;Flavobacteriaceae;NS5 marine group;unknown species	OTU_585	0	0	0	0	0	0	1	0	0	0	0	1	0	1	0	0	0	0	1	0	0	0	0	0	0	0	0	0	0	0	0	0	0	1	1	0	1	0	0	1	0	1	0	1	0	1	0	0
Bacteria;Bacteroidetes;Bacteroidia;Flavobacteriales;Flavobacteriaceae;NS5 marine group;unknown species	OTU_821	0	0	0	0	0	0	1	1	0	0	0	0	0	0	0	0	0	0	0	0	0	0	0	1	0	0	0	0	2	0	1	0	0	0	0	0	0	0	0	0	0	0	0	0	0	0	0	0
Bacteria;Bacteroidetes;Bacteroidia;Flavobacteriales;Flavobacteriaceae;NS5 marine group;unknown species	OTU_1102	0	0	0	0	0	0	0	0	0	0	0	0	0	0	0	0	0	0	0	0	0	0	0	0	0	0	1	0	0	0	0	0	0	0	0	0	0	0	0	0	0	0	0	0	1	0	0	0
Bacteria;Bacteroidetes;Bacteroidia;Flavobacteriales;Flavobacteriaceae;NS5 marine group;unknown species	OTU_1104	0	0	0	0	0	0	0	0	0	1	0	0	0	1	0	0	0	0	0	0	0	0	0	0	0	0	0	0	0	0	0	0	0	0	1	0	1	0	0	0	0	0	0	1	0	1	0	0
Bacteria;Bacteroidetes;Bacteroidia;Flavobacteriales;Flavobacteriaceae;NS5 marine group;unknown species	OTU_1156	2	0	0	1	0	0	0	0	0	0	0	0	0	0	0	0	0	0	0	0	0	0	0	0	0	0	0	0	0	0	0	0	0	0	0	0	0	0	0	1	0	0	0	0	1	1	0	0
Bacteria;Bacteroidetes;Bacteroidia;Flavobacteriales;Flavobacteriaceae;unknown genus;unknown species	OTU_264	0	1	0	0	1	0	0	0	0	0	2	1	1	0	1	1	0	1	1	0	1	2	0	0	1	0	0	0	0	0	4	0	0	1	0	0	0	0	1	0	0	1	1	2	2	3	0	0
Bacteria;Bacteroidetes;Bacteroidia;Flavobacteriales;Flavobacteriaceae;unknown genus;unknown species	OTU_464	1	0	0	0	0	0	0	0	0	0	0	0	0	1	0	0	0	0	0	2	0	0	0	1	1	0	0	0	0	0	0	0	3	0	1	0	0	0	0	0	0	0	0	1	0	2	0	0
Bacteria;Bacteroidetes;Bacteroidia;Flavobacteriales;Flavobacteriaceae;unknown genus;unknown species	OTU_732	1	0	232	2	0	0	0	1	0	0	1	1	1	0	0	0	0	0	0	0	0	1	1	0	250	0	19	0	0	0	0	0	1	0	0	0	1	0	2	1	0	1	1	0	5	2	3	3
Bacteria;Bacteroidetes;Bacteroidia;Flavobacteriales;Flavobacteriaceae;unknown genus;unknown species	OTU_985	0	0	0	0	0	0	0	0	0	0	0	0	0	0	0	0	0	0	0	0	0	0	0	0	0	0	0	0	0	0	0	0	0	0	0	0	0	1	0	1	0	0	0	79	102	143	2	4
Bacteria;Bacteroidetes;Bacteroidia;Flavobacteriales;Flavobacteriaceae;unknown genus;unknown species	OTU_1041	0	1	0	0	0	0	1	0	0	0	0	0	1	0	0	0	0	0	0	0	0	0	0	0	0	0	0	0	0	0	0	0	0	0	0	0	0	0	0	0	1	0	2	0	4	2	0	0
Bacteria;Bacteroidetes;Bacteroidia;Flavobacteriales;Flavobacteriaceae;unknown genus;unknown species	OTU_1048	0	2	0	0	0	0	0	0	0	0	0	0	0	0	0	0	0	0	0	0	0	0	0	0	0	0	0	0	1	0	0	0	0	0	0	0	318	0	1	7	3	3	1	0	2	1	0	2
Bacteria;Bacteroidetes;Bacteroidia;Flavobacteriales;NS7 marine group;unknown genus;unknown species	OTU_192	0	0	1	1	1	4	3	0	0	3	0	0	1	0	0	1	0	0	0	2	0	1	1	0	0	1	0	0	0	0	0	0	0	0	0	0	2	0	4	1	1	1	2	1	1	1	0	1
Bacteria;Bacteroidetes;Bacteroidia;Flavobacteriales;NS7 marine group;unknown genus;unknown species	OTU_1270	0	0	0	0	0	0	0	0	0	1	0	0	0	0	0	0	0	0	0	1	0	0	0	0	1	0	0	0	0	0	0	0	0	0	0	0	0	0	0	0	0	0	0	0	0	0	0	0
Bacteria;Bacteroidetes;Bacteroidia;Flavobacteriales;NS9 marine group;unknown genus;marine metagenome	OTU_401	0	0	0	2	0	1	1	2	0	2	0	0	2	0	1	0	1	0	0	1	0	0	0	1	1	0	0	0	0	0	0	0	0	0	0	0	0	0	0	1	0	0	0	0	0	1	2	0
Bacteria;Bacteroidetes;Bacteroidia;Flavobacteriales;NS9 marine group;unknown genus;unknown species	OTU_190	1	0	0	2	0	1	1	2	0	0	0	1	1	0	0	2	1	0	0	1	0	2	3	1	3	2	1	0	0	0	0	0	0	0	0	0	1	0	0	0	1	2	1	4	1	0	1	1
Bacteria;Bacteroidetes;Bacteroidia;Flavobacteriales;NS9 marine group;unknown genus;unknown species	OTU_217	0	0	0	0	0	0	0	1	0	1	1	0	2	0	0	0	0	0	0	0	0	0	0	0	1	0	2	0	0	0	0	0	0	0	0	0	1	1	0	0	0	0	0	1	2	1	0	0
Bacteria;Bacteroidetes;Bacteroidia;Flavobacteriales;NS9 marine group;unknown genus;unknown species	OTU_237	0	1	0	2	0	1	0	1	0	0	0	0	0	0	0	1	0	0	1	1	0	1	0	0	1	3	0	0	1	0	0	0	0	0	2	0	1	0	1	0	2	3	1	1	0	2	0	0
Bacteria;Bacteroidetes;Bacteroidia;Flavobacteriales;NS9 marine group;unknown genus;unknown species	OTU_325	0	0	1	0	0	0	0	0	0	1	2	0	2	0	1	1	0	1	1	0	1	0	2	0	1	1	0	0	1	0	0	0	1	0	0	0	0	0	2	1	1	0	1	2	0	0	1	1
Bacteria;Bacteroidetes;Bacteroidia;Flavobacteriales;NS9 marine group;unknown genus;unknown species	OTU_421	0	0	0	0	0	0	2	0	1	0	0	0	0	0	0	1	0	0	0	0	0	0	1	1	0	2	1	0	0	0	0	0	0	0	3	0	1	0	0	0	0	0	3	2	2	0	1	2
Bacteria;Bacteroidetes;Bacteroidia;Flavobacteriales;NS9 marine group;unknown genus;unknown species	OTU_494	0	0	1	1	0	0	0	0	0	0	0	1	1	0	0	1	1	0	1	1	0	0	0	0	0	2	0	0	1	0	0	0	1	0	0	0	1	0	0	4	0	0	0	0	0	1	3	1
Bacteria;Bacteroidetes;Bacteroidia;Flavobacteriales;NS9 marine group;unknown genus;unknown species	OTU_632	1	0	0	0	0	0	0	0	0	0	0	0	0	1	0	1	0	0	0	0	0	0	0	0	0	694	0	0	0	0	0	0	0	0	0	0	0	0	0	0	0	0	0	0	0	0	0	3
Bacteria;Bacteroidetes;Bacteroidia;Flavobacteriales;NS9 marine group;unknown genus;unknown species	OTU_1000	0	0	0	0	0	0	0	0	0	0	0	0	0	0	0	138	0	0	1	0	0	0	0	0	0	0	0	0	0	0	0	0	0	0	0	0	0	0	0	0	2	0	0	0	0	1	0	1
Bacteria;Bacteroidetes;Bacteroidia;Flavobacteriales;Schleiferiaceae;Schleiferia;unknown species	OTU_667	1	0	0	818	0	0	0	0	0	0	0	1	2	0	0	0	0	0	1	2	0	0	1	0	1	2	0	0	2	0	0	0	0	0	0	0	0	0	0	0	0	0	0	0	0	0	0	1
Bacteria;Bacteroidetes;Bacteroidia;Flavobacteriales;Schleiferiaceae;Schleiferia;unknown species	OTU_823	0	0	137	0	0	0	0	0	0	0	291	0	0	0	0	0	0	0	0	0	0	0	0	0	0	1	13	0	0	0	0	0	0	0	0	0	0	0	0	0	0	1	0	23	13	17	0	1
Bacteria;Bacteroidetes;Bacteroidia;Flavobacteriales;Weeksellaceae;Chryseobacterium;Multi-affiliation	OTU_784	0	0	0	0	171	1	0	0	0	0	1	0	0	0	0	0	0	0	0	0	0	0	0	0	1	0	0	0	0	0	0	483	0	1	0	0	0	0	0	0	0	0	0	0	0	0	1	0
Bacteria;Bacteroidetes;Bacteroidia;Flavobacteriales;Weeksellaceae;Chryseobacterium;unknown species	OTU_390	0	0	125	0	0	0	0	1	0	0	0	0	1	0	0	0	0	0	0	49	0	1166	1	0	1	0	10	0	0	0	1	0	0	0	0	0	0	0	0	0	0	0	0	0	0	0	1	0
Bacteria;Bacteroidetes;Bacteroidia;Flavobacteriales;Weeksellaceae;Chryseobacterium;unknown species	OTU_1042	0	0	1	0	0	0	240	2	0	0	0	0	106	0	0	0	0	0	0	1	0	1	0	1	0	0	0	0	0	0	0	0	0	0	1	0	0	0	1	0	0	0	0	0	0	0	0	0
Bacteria;Bacteroidetes;Bacteroidia;Flavobacteriales;Weeksellaceae;Cloacibacterium;unknown species	OTU_43	3	0	11	2	0	1	2	1	1	6	3	2	167	1	634	1	0	0	1	859	1	518	7	4	4	2	1020	3	1	30	3	1624	2	2	1	7073	3	1	1	6	1	2	3	2	2	3	0	1
Bacteria;Bacteroidetes;Bacteroidia;Flavobacteriales;Weeksellaceae;unknown genus;Flavobacteriaceae bacterium NP5	OTU_432	0	0	0	0	0	0	0	0	0	0	0	0	0	0	0	0	0	0	0	0	0	0	0	0	0	0	0	0	0	1	0	0	0	0	0	1126	0	0	0	0	0	0	0	0	0	0	0	0
Bacteria;Bacteroidetes;Bacteroidia;Sphingobacteriales;Lentimicrobiaceae;unknown genus;unknown species	OTU_105	1	0	0	685	3	5	1122	540	0	1	1072	1	3	0	0	2	0	1	753	1	1	2	1	0	5	2	1	0	1	0	0	0	4	0	2	0	1	0	3	3	2	1	0	233	234	206	2	3
Bacteria;Bacteroidetes;Bacteroidia;Sphingobacteriales;Lentimicrobiaceae;unknown genus;unknown species	OTU_631	0	0	0	0	0	0	0	0	0	0	0	0	0	0	0	1	0	0	0	0	1	1	0	1	474	0	0	0	0	0	1	0	0	0	0	0	0	0	0	0	0	1	0	64	95	75	0	0
Bacteria;Bacteroidetes;Bacteroidia;Sphingobacteriales;Lentimicrobiaceae;unknown genus;unknown species	OTU_735	0	0	0	1	0	0	1	0	0	1	155	0	1	0	0	0	0	0	0	0	0	0	0	233	0	1	0	0	1	0	0	0	0	0	0	0	0	0	0	0	1	0	0	51	57	58	1	0
Bacteria;Bacteroidetes;Bacteroidia;Sphingobacteriales;Lentimicrobiaceae;unknown genus;unknown species	OTU_1242	0	0	0	0	1	0	0	0	0	0	0	1	0	1	0	1	0	0	0	1	0	0	1	0	0	0	0	0	0	0	0	0	0	0	0	0	0	0	10	10	0	60	152	1	0	0	3	3
Bacteria;Bacteroidetes;Bacteroidia;Sphingobacteriales;Lentimicrobiaceae;unknown genus;unknown species	OTU_1379	0	0	0	0	0	0	0	1	0	0	166	0	1	0	0	0	0	0	1	0	0	0	0	1	0	0	0	0	0	0	0	0	0	0	0	0	0	0	0	0	0	0	0	38	30	39	0	0
Bacteria;Bacteroidetes;Bacteroidia;Sphingobacteriales;NS11-12 marine group;unknown genus;marine metagenome	OTU_1103	0	1	0	0	0	0	1	0	1	0	0	0	0	0	0	0	0	1	0	0	0	0	1	0	0	0	0	0	0	0	0	0	0	0	0	0	0	0	1	1	0	0	0	0	2	0	0	0
Bacteria;Bacteroidetes;Bacteroidia;Sphingobacteriales;NS11-12 marine group;unknown genus;Multi-affiliation	OTU_123	1	1	0	1	0	0	0	1	0	1	2	0	0	0	1	0	2	0	3	1	1	2	0	2	6	685	0	0	0	0	0	0	0	0	1	0	3	1	0	0	3	2	2	4	6	3	1	1
Bacteria;Bacteroidetes;Bacteroidia;Sphingobacteriales;NS11-12 marine group;unknown genus;unknown species	OTU_730	0	0	0	0	0	0	0	0	0	0	0	2	0	0	1	0	0	0	0	0	0	0	0	0	1	2	0	0	0	0	0	0	0	0	1	0	0	0	0	0	1	0	1	0	1	1	0	0
Bacteria;Bacteroidetes;Bacteroidia;Sphingobacteriales;Sphingobacteriaceae;Pedobacter;Flavobacterium sp.	OTU_659	0	0	0	1	0	1	0	0	0	0	0	1	0	0	0	0	0	0	0	1	0	2	0	0	0	0	0	0	0	0	0	0	0	0	0	0	1	0	19	1	0	0	0	1	0	0	0	0
Bacteria;Bacteroidetes;Bacteroidia;Sphingobacteriales;Sphingobacteriaceae;Sphingobacterium;Multi-affiliation	OTU_466	0	0	0	0	0	0	1	2	0	0	0	0	2	0	0	0	0	0	0	785	0	37	1	0	1	1	0	0	0	0	0	0	1	1422	0	0	0	2	1	0	3	2	1	1	3	1	1	1
Bacteria;Bacteroidetes;Ignavibacteria;Ignavibacteriales;Ignavibacteriaceae;Ignavibacterium;unknown species	OTU_1036	0	0	0	0	0	0	0	0	0	0	0	1	0	0	0	0	0	0	0	0	1	0	1	364	1	0	0	0	0	0	0	0	0	0	0	0	0	0	2	2	2	0	0	2	0	2	0	1
Bacteria;Bacteroidetes;Ignavibacteria;Ignavibacteriales;Melioribacteraceae;IheB3-7;unknown species	OTU_111	2	0	3	1	1	3	1	0	1	5	1	0	4	1	1	2	1	1	0	1	1	2	2	0	2	4	6	0	2	0	1	0	119	0	0	0	0	1	186	200	110	187	246	3	7	2	100	149
Bacteria;Bacteroidetes;Ignavibacteria;Ignavibacteriales;Melioribacteraceae;IheB3-7;unknown species	OTU_117	0	0	0	125	0	2	0	70	0	0	37	1	3	2	0	0	3	1224	0	1	1	1	496	116	6	2	1	0	0	0	1	0	3	0	1	0	1	1	3	40	1	40	14	599	737	617	2	2
Bacteria;Bacteroidetes;Ignavibacteria;Ignavibacteriales;Melioribacteraceae;IheB3-7;unknown species	OTU_243	0	0	0	3	1	0	1	1	0	0	71	1	0	0	0	70	0	0	0	2	1	1	2	437	2	1	0	0	0	0	0	0	1	0	0	0	1	1	77	67	82	6	12	322	450	376	1	2
Bacteria;Bacteroidetes;Ignavibacteria;Ignavibacteriales;Melioribacteraceae;IheB3-7;unknown species	OTU_800	1	0	0	1	0	0	0	0	0	1	0	0	0	0	0	0	0	0	0	0	1	0	0	0	0	0	0	0	0	0	0	0	0	0	0	0	1	1	0	0	1	0	0	177	166	155	0	0
Bacteria;Bacteroidetes;Ignavibacteria;Ignavibacteriales;Melioribacteraceae;IheB3-7;unknown species	OTU_1158	0	0	0	0	0	0	0	0	0	0	0	0	0	0	0	0	0	0	0	0	0	0	0	0	300	0	0	0	1	0	0	0	0	0	1	0	0	0	0	0	0	0	0	1	0	0	0	0
Bacteria;Bacteroidetes;Ignavibacteria;Ignavibacteriales;Melioribacteraceae;IheB3-7;unknown species	OTU_1263	0	0	0	0	0	0	0	0	0	0	0	0	0	1	0	0	0	0	0	0	0	0	0	1	268	0	0	0	0	0	0	0	0	0	1	0	1	0	1	0	0	0	2	0	1	0	0	0
Bacteria;Bacteroidetes;Ignavibacteria;Ignavibacteriales;Melioribacteraceae;IheB3-7;unknown species	OTU_1680	0	0	0	2	0	0	0	0	0	1	0	0	0	0	0	0	0	0	1	1	0	0	0	0	0	1	0	0	0	0	0	0	116	0	0	0	0	1	6	11	1	28	35	0	1	1	18	19
Bacteria;Bacteroidetes;Ignavibacteria;Ignavibacteriales;Multi-affiliation;Multi-affiliation;Multi-affiliation	OTU_1096	0	0	0	0	1	0	0	0	0	1	0	0	0	0	0	0	0	0	0	0	0	0	0	336	0	1	0	0	0	0	0	0	0	0	0	0	0	0	1	0	0	3	0	0	2	1	0	0
Bacteria;Bacteroidetes;Ignavibacteria;Ignavibacteriales;PHOS-HE36;unknown genus;unknown species	OTU_159	0	0	1	0	1	3	4	0	0	1	86	1	2	0	0	2	2	1	1200	0	0	2	213	0	718	1	0	0	0	0	4	0	1	0	0	0	150	0	7	31	18	129	47	160	199	193	102	86
Bacteria;Bacteroidetes;Ignavibacteria;Ignavibacteriales;PHOS-HE36;unknown genus;unknown species	OTU_309	0	0	0	0	0	0	2	2	2	0	0	0	0	1	0	0	1	0	0	1	1	1	1	0	1	0	0	0	0	0	0	0	0	0	2	0	0	0	288	230	139	30	66	4	2	3	203	367
Bacteria;Bacteroidetes;Ignavibacteria;Ignavibacteriales;PHOS-HE36;unknown genus;unknown species	OTU_471	1	0	0	0	0	0	0	0	0	0	0	0	0	0	0	0	0	0	1	0	0	0	1	435	1	0	0	0	0	0	1	0	0	1	0	0	0	1	69	44	58	0	5	145	196	143	1	1
Bacteria;Bacteroidetes;Ignavibacteria;Ignavibacteriales;PHOS-HE36;unknown genus;unknown species	OTU_1016	0	0	0	0	0	0	0	1	0	0	1	0	0	0	0	1	0	0	0	0	0	0	0	0	1	0	0	0	0	0	1	0	0	0	0	0	0	0	2	0	1	0	1	104	133	104	0	1
Bacteria;Bacteroidetes;Ignavibacteria;OPB56;unknown family;unknown genus;unknown species	OTU_260	0	0	0	0	0	0	0	0	0	1	1	1	1	0	0	0	0	0	0	2	1	600	2	255	0	771	0	0	0	0	0	0	0	1	0	0	0	0	11	33	4	16	7	73	104	63	2	0
Bacteria;Bacteroidetes;Ignavibacteria;OPB56;unknown family;unknown genus;unknown species	OTU_843	0	0	0	0	0	0	0	0	0	0	0	0	0	0	0	0	0	0	0	0	1	1	509	0	0	0	0	0	0	0	0	0	0	0	0	0	0	0	0	0	0	0	0	1	0	2	0	0
Bacteria;Bacteroidetes;Rhodothermia;Balneolales;Balneolaceae;Balneola;unknown species	OTU_371	1	0	0	0	0	0	0	2	2	0	0	1	1	2	0	3	0	1	0	0	0	0	1	0	1	1	0	0	0	0	1	0	1	1	1	0	0	0	0	1	2	1	2	1	1	1	1	1
Bacteria;Bacteroidetes;Rhodothermia;Rhodothermales;Rhodothermaceae;unknown genus;unknown species	OTU_1243	0	0	0	0	0	0	0	0	0	0	0	0	0	0	0	0	0	0	0	0	0	0	0	0	1	0	0	0	0	0	1	0	0	0	1	0	0	0	0	1	0	12	8	1	0	0	46	120
Bacteria;Calditrichaeota;Calditrichia;Calditrichales;Calditrichaceae;Caldithrix;Caldithrix abyssi	OTU_221	0	1	0	0	0	1	1	2	0	1	3	0	0	0	0	1	1	0	1	0	0	1	1	2	1	2	0	0	0	0	1	0	0	0	0	0	833	0	16	24	6	405	454	1	0	2	151	172
Bacteria;Calditrichaeota;Calditrichia;Calditrichales;Calditrichaceae;Caldithrix;Caldithrix palaeochoryensis	OTU_498	0	0	0	0	0	0	0	0	0	0	0	0	0	1	0	0	0	0	0	0	1	0	0	0	0	0	0	0	0	0	0	0	0	0	0	0	379	1	8	10	4	78	68	1	1	0	143	182
Bacteria;Calditrichaeota;Calditrichia;Calditrichales;Calditrichaceae;Caldithrix;unknown species	OTU_183	0	1	233	1	1	1	0	1	0	0	30	2	1	0	0	0	0	0	1	0	1	0	274	2	1	0	3	0	0	0	1	0	58	0	0	0	2	0	285	159	94	205	191	108	131	142	256	171
Bacteria;Calditrichaeota;Calditrichia;Calditrichales;Calditrichaceae;Caldithrix;unknown species	OTU_361	0	0	1	1	0	1	0	120	0	1	0	0	1	0	0	0	0	0	1	0	0	3	391	0	541	1	0	0	0	0	0	0	1	2	0	0	1	0	1	2	0	0	1	137	167	133	0	1
Bacteria;Calditrichaeota;Calditrichia;Calditrichales;Calditrichaceae;Caldithrix;unknown species	OTU_1109	0	0	0	0	0	0	0	0	0	0	0	0	0	0	0	0	0	0	0	0	0	0	0	0	0	0	0	0	0	0	0	0	0	0	0	0	0	0	62	57	17	11	10	3	8	2	47	43
Bacteria;Calditrichaeota;Calditrichia;Calditrichales;Calditrichaceae;Calorithrix;bacterium enrichment culture clone Anammox_9	OTU_439	1	2	0	0	1	2	0	1	0	0	0	0	0	0	1	1	0	0	0	2	0	0	1	0	0	0	0	0	0	0	0	0	0	2	0	0	0	1	15	12	4	0	1	1	2	1	46	56
Bacteria;Calditrichaeota;Calditrichia;Calditrichales;Calditrichaceae;Calorithrix;bacterium enrichment culture clone Anammox_9	OTU_1100	0	0	0	0	0	0	0	0	0	0	0	0	0	0	0	0	0	0	0	0	0	0	0	0	0	0	0	0	0	0	1	0	0	0	0	0	0	0	53	52	36	9	11	0	0	0	52	47
Bacteria;Calditrichaeota;Calditrichia;Calditrichales;Calditrichaceae;Calorithrix;Calorithrix insularis	OTU_1237	0	0	1	0	0	0	0	0	0	0	0	0	0	0	0	0	0	0	0	0	0	0	1	0	1	0	0	0	0	0	0	0	0	0	0	0	0	0	74	65	52	0	8	0	0	0	29	18
Bacteria;Calditrichaeota;Calditrichia;Calditrichales;Calditrichaceae;Calorithrix;Multi-affiliation	OTU_442	1	1	0	51	1	2	1	1	0	0	121	0	1	0	0	0	0	0	0	1	0	1	1	1	0	358	0	0	0	0	1	0	1	0	0	0	0	0	15	12	5	0	5	207	222	171	4	3
Bacteria;Calditrichaeota;Calditrichia;Calditrichales;Calditrichaceae;Calorithrix;unidentified bacterium wb1_A09	OTU_346	0	0	0	3	0	1	0	1	1	0	1	0	1	0	0	1	0	0	0	0	0	0	0	0	0	1	0	0	0	0	1	0	1	0	0	0	1	1	22	48	39	107	107	0	0	0	459	321
Bacteria;Calditrichaeota;Calditrichia;Calditrichales;Calditrichaceae;Calorithrix;unknown species	OTU_265	1	0	2	0	0	1	3	1	0	0	1	1	1	0	1	0	0	1	0	0	0	0	580	0	0	1	0	0	0	0	0	0	1	1	0	0	641	2	33	28	18	15	14	144	154	134	45	31
Bacteria;Calditrichaeota;Calditrichia;Calditrichales;Calditrichaceae;Calorithrix;unknown species	OTU_277	3	0	1	1	1	0	0	1	0	0	0	1	1	0	0	2	0	0	1	0	1	1	0	0	1	0	0	0	0	0	1	0	1	1	0	0	0	0	1	1	1	40	38	1	0	1	485	630
Bacteria;Calditrichaeota;Calditrichia;Calditrichales;Calditrichaceae;Calorithrix;unknown species	OTU_649	0	0	0	0	0	0	3	0	1	0	1	0	1	1	0	0	0	0	0	1	0	0	0	0	2	0	0	0	0	0	1	0	1	0	1	0	0	0	10	25	20	683	482	0	0	1	14	17
Bacteria;Calditrichaeota;Calditrichia;Calditrichales;Calditrichaceae;Calorithrix;unknown species	OTU_762	0	0	0	0	0	0	1	0	0	0	0	0	0	2	1	0	0	0	0	1	0	0	1	0	1	0	0	0	0	0	0	0	0	0	0	0	0	0	9	9	6	230	104	0	0	1	93	86
Bacteria;Calditrichaeota;Calditrichia;Calditrichales;Calditrichaceae;Calorithrix;unknown species	OTU_877	0	0	0	0	0	0	0	0	0	0	0	0	0	0	0	0	0	0	0	0	0	0	1	0	0	1	0	0	0	0	0	0	0	0	0	0	0	0	8	24	7	42	21	0	0	2	103	140
Bacteria;Calditrichaeota;Calditrichia;Calditrichales;Calditrichaceae;Calorithrix;unknown species	OTU_1034	0	0	0	0	0	1	0	1	0	0	0	0	0	0	0	1	0	0	0	0	0	0	0	0	0	0	0	0	0	0	0	0	0	0	0	0	0	0	8	36	28	176	44	19	14	25	7	2
Bacteria;Calditrichaeota;Calditrichia;Calditrichales;Calditrichaceae;Calorithrix;unknown species	OTU_1236	0	0	0	0	0	1	0	0	0	0	0	0	0	0	0	1	0	1	0	0	0	0	0	0	0	0	0	0	0	0	0	0	1	1	1	0	0	1	47	79	17	202	80	0	2	1	72	68
Bacteria;Calditrichaeota;Calditrichia;Calditrichales;Calditrichaceae;JdFR-76;unidentified bacterium wb1_H02	OTU_1120	0	0	0	0	0	0	0	0	0	0	0	0	0	0	0	0	0	0	0	1	0	0	0	0	0	0	0	0	0	0	0	0	1	0	1	0	0	0	0	1	0	0	0	1	0	1	110	98
Bacteria;Calditrichaeota;Calditrichia;Calditrichales;Calditrichaceae;JdFR-76;unknown species	OTU_566	0	0	1	0	0	0	0	1	1	1	0	0	0	0	0	0	1	1	0	0	0	0	0	1	1	0	0	0	0	0	0	0	0	0	2	0	511	0	4	13	0	46	79	0	0	0	60	56
Bacteria;Calditrichaeota;Calditrichia;Calditrichales;Calditrichaceae;JdFR-76;unknown species	OTU_838	0	0	0	0	0	0	0	0	0	1	0	0	0	0	0	0	0	0	0	0	0	0	1	0	0	0	0	0	0	0	0	0	0	0	0	0	0	0	15	7	6	41	5	0	0	1	104	178
Bacteria;Calditrichaeota;Calditrichia;Calditrichales;Calditrichaceae;unknown genus;unknown species	OTU_479	1	0	0	1	1	1	1	0	0	0	1	1	2	0	0	0	0	0	1	1	1	1	0	0	0	0	1	0	1	0	0	0	0	0	0	0	0	0	9	5	2	11	9	1	2	1	7	10
Bacteria;Calditrichaeota;Calditrichia;Calditrichales;Calditrichaceae;unknown genus;unknown species	OTU_977	0	0	0	0	0	0	0	2	0	0	0	0	0	0	0	0	0	0	0	0	0	0	0	0	0	0	0	0	0	0	0	0	0	0	0	0	0	1	87	57	51	25	36	1	2	1	40	26
Bacteria;Calditrichaeota;Calditrichia;Calditrichales;Calditrichaceae;unknown genus;unknown species	OTU_1137	0	0	0	0	0	0	2	0	0	1	0	0	0	0	0	0	0	0	0	0	0	0	0	0	1	0	0	0	0	0	0	0	0	0	0	0	77	0	15	24	3	26	53	1	1	0	29	25
Bacteria;Chlamydiae;Chlamydiae;Chlamydiales;Criblamydiaceae;unknown genus;unknown species	OTU_503	0	0	0	0	0	1	1039	0	0	0	0	0	0	0	1	0	0	0	0	0	0	0	0	0	0	0	0	0	0	0	0	0	0	0	0	0	0	0	0	1	0	0	1	1	0	0	1	0
Bacteria;Chlamydiae;Chlamydiae;Chlamydiales;Criblamydiaceae;unknown genus;unknown species	OTU_664	0	0	0	0	0	0	0	0	0	0	0	0	1	0	0	0	0	0	0	0	0	703	0	0	0	0	0	0	0	0	0	0	0	0	0	0	0	0	0	0	0	0	0	0	0	0	0	0
Bacteria;Chloroflexi;Anaerolineae;Anaerolineales;Anaerolineaceae;Thermomarinilinea;Thermomarinilinea lacunifontana	OTU_177	2	2	0	1	0	2	2	1	1	1	0	0	1	0	1	1	3	1	1	0	0	2	2	0	2	3	0	0	1	0	4	0	1	1	4	0	1	1	11	25	6	1333	837	2	3	2	115	88
Bacteria;Chloroflexi;Anaerolineae;Anaerolineales;Anaerolineaceae;Thermomarinilinea;unknown species	OTU_308	0	0	1	1	0	1	0	407	1	0	180	1	1	0	0	0	0	1	0	0	1	0	1	1	0	0	0	0	0	0	2	0	0	1177	1	0	50	0	38	30	17	18	39	56	48	39	36	7
Bacteria;Chloroflexi;Anaerolineae;Anaerolineales;Anaerolineaceae;Thermomarinilinea;unknown species	OTU_693	0	0	0	487	0	0	0	52	0	0	0	0	1	1	1	0	0	1	0	0	0	1	0	0	0	0	0	0	0	0	0	0	1	1	1	0	0	0	0	0	0	0	0	35	8	37	0	0
Bacteria;Chloroflexi;Anaerolineae;Anaerolineales;Anaerolineaceae;unknown genus;unknown species	OTU_25	11	5	6	4	3	11	17	12	2	4	8	6	10	14	5	18	9	5	11	12	11	12	10	4	20	13	3	0	2	0	13	0	42	8	8	0	16	12	503	1059	210	3654	2189	12	10	12	6514	4992
Bacteria;Chloroflexi;Anaerolineae;Anaerolineales;Anaerolineaceae;unknown genus;unknown species	OTU_300	2	1	0	0	0	0	1	2	0	1	0	2	3	1	1	1	0	0	0	1	1	1	1	0	2	2	1	0	1	0	1	0	1	1	1	0	1	0	0	1	0	2	5	0	3	0	17	10
Bacteria;Chloroflexi;Anaerolineae;Anaerolineales;Anaerolineaceae;unknown genus;unknown species	OTU_364	0	0	0	0	1	0	0	0	0	1	0	0	0	0	0	0	3	1	1	1	0	0	0	0	0	0	1	0	0	0	0	0	0	0	1	0	175	0	38	72	10	193	167	0	3	0	242	214
Bacteria;Chloroflexi;Anaerolineae;Anaerolineales;Anaerolineaceae;unknown genus;unknown species	OTU_382	0	0	0	2	0	0	0	1	1	0	0	0	0	0	0	0	1	0	1	1	0	0	1	0	1	1	1	0	0	0	0	0	0	0	1	0	0	0	24	23	17	4	3	0	0	1	446	375
Bacteria;Chloroflexi;Anaerolineae;Anaerolineales;Anaerolineaceae;unknown genus;unknown species	OTU_572	1	0	0	0	0	0	0	0	0	1	126	0	1	3	1	0	0	0	0	0	0	0	712	0	0	0	0	0	1	0	0	0	1	0	0	0	1	0	0	0	0	0	0	10	5	4	2	0
Bacteria;Chloroflexi;Anaerolineae;Anaerolineales;Anaerolineaceae;unknown genus;unknown species	OTU_894	0	1	1	0	0	0	0	0	0	0	1	0	0	0	0	0	0	0	0	0	0	1	0	1	0	1	0	0	0	0	0	0	0	1	1	0	0	1	191	202	45	3	5	1	1	0	4	1
Bacteria;Chloroflexi;Anaerolineae;Anaerolineales;Anaerolineaceae;unknown genus;unknown species	OTU_1005	0	0	0	0	0	0	0	1	320	0	1	0	0	0	0	0	0	0	0	0	0	0	0	1	0	0	0	0	1	0	0	0	1	0	0	0	0	0	0	0	1	1	0	13	9	4	0	0
Bacteria;Chloroflexi;Anaerolineae;Anaerolineales;Anaerolineaceae;unknown genus;unknown species	OTU_1053	0	0	0	0	0	0	0	0	0	0	0	0	0	0	0	0	0	0	0	1	0	0	0	0	0	0	0	0	0	0	0	0	0	0	0	0	0	0	0	0	0	2	11	0	0	0	92	130
Bacteria;Chloroflexi;Anaerolineae;Anaerolineales;Anaerolineaceae;unknown genus;unknown species	OTU_1146	0	0	0	1	0	0	0	0	0	1	0	0	0	0	0	1	0	0	0	0	0	0	0	0	0	1	0	0	0	0	0	0	0	0	1	0	0	0	81	134	32	8	8	0	0	0	8	4
Bacteria;Chloroflexi;Anaerolineae;Anaerolineales;Anaerolineaceae;unknown genus;unknown species	OTU_1476	0	0	0	1	1	0	0	1	0	7	0	2	0	0	0	0	0	0	1	1	0	0	0	0	0	0	0	0	0	0	1	0	33	0	0	0	3	2	29	30	26	1	0	65	89	64	0	2
Bacteria;Chloroflexi;Anaerolineae;Anaerolineales;Anaerolineaceae;unknown genus;unknown species	OTU_1492	0	0	0	0	0	0	0	0	0	0	0	0	0	0	0	0	0	0	0	0	0	0	1	0	0	0	0	0	0	0	0	0	0	0	0	0	0	1	4	12	1	56	26	1	0	0	83	53
Bacteria;Chloroflexi;Anaerolineae;Ardenticatenales;unknown family;unknown genus;unknown species	OTU_197	0	0	2	3	0	2	0	2	1	0	0	1	1	0	0	0	0	0	1	1	0	1	1	0	0	1	0	0	0	0	2	0	0	1	0	0	0	0	448	295	142	230	252	0	2	1	349	341
Bacteria;Chloroflexi;Anaerolineae;Ardenticatenales;unknown family;unknown genus;unknown species	OTU_386	1	0	0	0	0	1	0	0	0	0	0	0	0	1	1	0	1	0	1	1	0	0	1	1	0	1	1	0	1	0	0	0	1	2	0	0	1	1	114	122	33	49	83	1	0	1	320	276
Bacteria;Chloroflexi;Anaerolineae;Ardenticatenales;unknown family;unknown genus;unknown species	OTU_454	0	1	2	0	0	0	0	0	0	0	0	1	0	0	0	1	1	1	0	0	0	0	0	0	1	2	1	0	0	0	1	0	0	0	0	0	0	0	22	51	13	205	115	60	58	59	174	155
Bacteria;Chloroflexi;Anaerolineae;Ardenticatenales;unknown family;unknown genus;unknown species	OTU_885	0	0	1	0	0	0	0	0	0	0	0	0	0	0	0	0	0	0	2	0	0	0	0	0	1	0	0	0	0	0	1	0	0	0	0	0	0	0	51	69	13	18	15	1	2	0	77	79
Bacteria;Chloroflexi;Anaerolineae;Ardenticatenales;unknown family;unknown genus;unknown species	OTU_1123	0	0	1	0	0	0	0	0	0	0	0	0	0	0	0	0	0	0	0	0	0	1	1	0	0	1	0	0	1	0	0	0	0	0	0	0	0	1	2	2	1	36	44	0	0	0	60	95
Bacteria;Chloroflexi;Anaerolineae;Ardenticatenales;unknown family;unknown genus;unknown species	OTU_1197	1	0	0	16	0	0	0	0	0	0	53	0	0	0	0	0	0	0	0	0	0	0	1	0	0	0	0	0	1	0	1	0	0	0	0	0	0	0	23	5	15	17	10	27	5	12	47	12
Bacteria;Chloroflexi;Anaerolineae;Caldilineales;Caldilineaceae;unknown genus;unknown species	OTU_65	5	1	2	2	3	4	4	3	2	2	7	0	7	2	0	3	1	3	2	5	5	3	0	0	3	4	1	0	1	0	1	0	2	1	1	0	2	5	67	30	24	54	27	4	4	6	2295	3081
Bacteria;Chloroflexi;Anaerolineae;Caldilineales;Caldilineaceae;unknown genus;unknown species	OTU_400	0	1	1	345	447	0	0	1	0	0	77	0	2	0	2	0	0	0	3	0	0	2	0	0	2	0	0	0	0	0	1	0	1	1	1	0	86	0	9	17	8	92	53	46	44	38	21	14
Bacteria;Chloroflexi;Anaerolineae;Caldilineales;Caldilineaceae;unknown genus;unknown species	OTU_865	0	1	0	0	0	0	1	0	0	0	0	0	0	0	0	0	0	0	0	0	0	460	0	0	0	0	0	0	0	0	0	0	0	1	0	0	0	0	0	0	0	0	0	0	0	0	0	0
Bacteria;Chloroflexi;Anaerolineae;Caldilineales;Caldilineaceae;unknown genus;unknown species	OTU_955	0	0	0	0	0	0	0	0	0	0	0	0	2	0	0	0	0	0	0	0	1	0	0	0	0	0	0	0	0	0	0	0	0	0	1	0	1	0	0	0	1	0	0	0	0	1	121	150
Bacteria;Chloroflexi;Anaerolineae;RBG-13-54-9;unknown family;unknown genus;unknown species	OTU_1105	0	0	1	0	0	0	0	0	1	0	0	0	1	0	0	0	0	0	0	0	0	0	0	0	0	0	0	0	0	0	1	0	0	0	0	0	306	0	1	0	0	1	1	0	0	0	5	6
Bacteria;Chloroflexi;Anaerolineae;SBR1031;unknown family;unknown genus;Multi-affiliation	OTU_437	1	0	0	0	0	2	0	0	0	0	0	0	1	0	0	1	0	0	0	0	0	1	0	0	1	0	0	0	0	0	0	0	1	1	0	0	249	1	2	8	0	293	577	0	0	1	24	25
Bacteria;Chloroflexi;Anaerolineae;SBR1031;unknown family;unknown genus;unknown species	OTU_339	0	0	17	1	0	1176	0	265	0	0	0	0	1	0	0	0	0	0	0	0	0	0	0	97	1	0	0	0	0	0	0	0	1	0	2	0	1	1	0	0	1	2	0	14	9	10	0	0
Bacteria;Chloroflexi;Anaerolineae;SBR1031;unknown family;unknown genus;unknown species	OTU_461	0	0	1	0	0	1	0	0	2	1	0	0	0	0	0	1	0	0	0	0	0	1	0	0	3	0	0	0	0	0	1	0	0	0	0	0	5	0	9	32	2	304	469	1	0	1	79	99
Bacteria;Chloroflexi;Anaerolineae;SBR1031;unknown family;unknown genus;unknown species	OTU_729	0	1	1	0	0	0	0	0	1	0	1	0	0	0	0	0	0	0	0	0	0	0	1	1	1	1	0	0	0	0	0	0	0	0	0	0	0	0	313	25	128	47	19	0	1	1	12	3
Bacteria;Chloroflexi;Anaerolineae;SBR1031;unknown family;unknown genus;unknown species	OTU_972	0	0	1	0	0	0	0	0	0	0	0	0	0	0	0	0	0	0	0	0	0	0	0	0	0	0	0	0	0	0	0	0	0	0	0	0	0	0	1	1	0	0	0	0	0	0	123	131
Bacteria;Chloroflexi;Anaerolineae;SJA-15;unknown family;unknown genus;unknown species	OTU_478	0	0	0	0	0	1	0	0	0	0	0	1	0	0	0	0	0	0	0	0	1	0	1	1	2	1	0	0	0	0	2	0	0	2	0	0	0	0	17	47	8	13	31	0	1	0	319	131
Bacteria;Chloroflexi;Anaerolineae;SJA-15;unknown family;unknown genus;unknown species	OTU_481	1	0	0	1	0	1	0	450	0	1	322	1	0	0	1	0	0	0	0	0	1	0	242	0	0	1	0	0	0	0	0	0	0	0	0	0	1	1	1	0	1	2	0	26	14	22	0	0
Bacteria;Chloroflexi;Anaerolineae;SJA-15;unknown family;unknown genus;unknown species	OTU_1155	0	0	0	0	0	0	0	0	0	0	0	0	0	0	0	0	0	0	0	0	0	0	0	0	0	0	0	0	0	0	0	255	0	0	0	0	0	0	0	0	0	0	0	0	0	0	0	0
Bacteria;Chloroflexi;Dehalococcoidia;MSBL5;unknown family;unknown genus;unknown species	OTU_1357	0	0	1	0	0	0	0	0	0	0	0	0	0	1	0	0	0	0	0	0	0	0	0	0	0	0	0	0	0	0	0	0	0	0	0	0	256	0	1	1	0	2	3	0	0	0	0	1
Bacteria;Cloacimonetes;Cloacimonadia;Cloacimonadales;MSBL8;unknown genus;bacterium enrichment culture clone E23	OTU_500	0	0	0	1	0	0	2	0	0	0	0	0	0	1	0	0	1	0	0	0	0	1053	0	0	0	1	0	0	0	0	1	0	0	0	0	0	0	0	0	0	0	0	1	0	3	0	0	0
Bacteria;Cloacimonetes;Cloacimonadia;Cloacimonadales;MSBL8;unknown genus;unknown species	OTU_969	0	0	0	0	0	0	0	66	220	0	194	0	0	0	0	0	0	0	0	0	0	0	0	1	0	0	0	0	0	0	0	0	0	0	0	0	0	0	0	0	0	0	0	26	22	21	0	0
Bacteria;Cyanobacteria;Melainabacteria;Gastranaerophilales;unknown family;unknown genus;unknown species	OTU_276	1	0	0	0	0	1	0	2	0	0	1	0	0	1	0	1	0	0	0	0	0	2	0	0	0	1857	0	0	0	0	0	0	0	0	0	0	0	0	1	2	0	2	4	2	1	4	1	0
Bacteria;Cyanobacteria;Oxyphotobacteria;Nostocales;Chroococcidiopsaceae;Aliterella CENA595;cyanobacterium OU_20	OTU_185	1	1	1	1	1	1	2	1	1	0	0	1	3	0	0	2	0	0	0	1	1	2	1	0	0	2	0	0	1	0	0	0	1	1	1	0	1	0	0	0	2	0	2	1	1	1	1	2
Bacteria;Cyanobacteria;Oxyphotobacteria;Nostocales;Nostocaceae;Scytonema UTEX 2349;unknown species	OTU_1241	0	0	0	0	0	0	0	2	0	0	0	0	0	0	243	0	0	0	0	0	0	0	0	0	0	0	0	0	0	0	0	0	0	0	1	0	0	0	0	1	0	0	0	0	1	0	0	0
Bacteria;Cyanobacteria;Oxyphotobacteria;Nostocales;Oscillatoriaceae;Planktothricoides SR001;unknown species	OTU_53	2	3	1	1	0	3	5	3	1	1	4	3	3	0	1	7	2	2	5	2	1	4	3	2	3	1	0	0	4	0	2	0	1	5	3	0	16265	1	4	4	5	5	4	4	7	2	7	7
Bacteria;Cyanobacteria;Oxyphotobacteria;Nostocales;Phormidiaceae;Arthrospira PCC-7345;unknown species	OTU_1094	0	1	0	0	0	0	0	0	0	0	0	0	0	0	0	0	0	0	0	0	0	1	0	0	0	0	0	0	0	0	0	0	0	0	0	0	0	0	4	5	4	116	165	2	4	1	1	2
Bacteria;Cyanobacteria;Oxyphotobacteria;Synechococcales;Cyanobiaceae;Cyanobium PCC-6307;Multi-affiliation	OTU_84	2	0	1	2	0	3	3	4	1	1	0	1	3	1	2	1	2	0	0	1	0	0	5	0	257	2	0	0	0	0	2	0	4	3	0	0	2	0	6	2	1	5	1	6	4	4	4	6
Bacteria;Cyanobacteria;Oxyphotobacteria;Synechococcales;Cyanobiaceae;Cyanobium PCC-6307;unknown species	OTU_362	0	0	1	0	0	0	0	2	0	0	1	0	0	0	0	2	2	1	0	2	0	0	1	0	0	0	0	0	0	0	1	0	1	2	0	0	0	0	1	0	1	0	1	0	3	0	1	0
Bacteria;Cyanobacteria;Oxyphotobacteria;Synechococcales;Cyanobiaceae;Multi-affiliation;Multi-affiliation	OTU_24	11	10	9	203	2	12	797	12	2	11	5	6	14	5	4	20	8	7	12	3	8	7	9	6	12	10	5	0	5	0	10	0	9	3	11	0	16	15	7	8	9	15	14	9	16	13	18	25
Bacteria;Cyanobacteria;Oxyphotobacteria;Synechococcales;Cyanobiaceae;Multi-affiliation;Multi-affiliation	OTU_174	1	1	0	2	0	1	2	0	0	274	2	1	1	0	0	1	0	1	0	0	2	0	1	0	3	1	1	0	0	0	1	0	1	2	2	0	3	0	2	0	4	1	5	2	4	5	10	15
Bacteria;Cyanobacteria;Oxyphotobacteria;Synechococcales;Cyanobiaceae;Prochlorococcus MIT9313;Multi-affiliation	OTU_244	1	0	0	2	0	1	1	1	0	1	1	1	3	0	0	0	0	0	0	1	0	0	3	1	1	1	0	0	0	0	2	0	0	0	0	0	1	1	0	1	0	2	0	1	0	1	1	0
Bacteria;Cyanobacteria;Oxyphotobacteria;Synechococcales;Cyanobiaceae;Prochlorococcus MIT9313;unknown species	OTU_1012	0	0	0	0	0	0	0	0	0	0	0	0	1	0	0	0	0	0	0	1	0	0	0	0	0	0	0	0	0	0	1	0	1	1	0	0	0	0	0	0	0	0	0	0	0	0	0	0
Bacteria;Cyanobacteria;Oxyphotobacteria;Synechococcales;Cyanobiaceae;Synechococcus CC9902;Multi-affiliation	OTU_209	0	0	0	1	0	1	421	0	0	0	0	0	4	1	0	2	0	1	1	1	0	0	0	0	4	0	0	0	0	0	0	0	0	0	0	0	1	1	1	0	2	1	2	1	1	1	2	1
Bacteria;Dadabacteria;Dadabacteriia;Dadabacteriales;unknown family;unknown genus;metagenome	OTU_948	0	0	0	0	0	0	0	0	0	0	0	0	0	0	0	0	0	0	1	0	0	0	0	0	1	0	0	0	0	0	0	0	0	0	0	0	0	0	0	0	0	0	0	0	1	0	0	0
Bacteria;Deinococcus-Thermus;Deinococci;Deinococcales;Deinococcaceae;Deinococcus;unknown species	OTU_611	0	0	0	0	0	0	0	0	0	0	0	0	0	0	0	0	0	0	0	465	309	0	0	0	0	0	0	0	0	0	0	0	0	0	2	0	1	0	0	0	0	0	0	0	0	1	0	0
Bacteria;Dependentiae;Babeliae;Babeliales;UBA12409;unknown genus;unknown species	OTU_144	1	1	1	1	0	0	2	2	0	3	0	0	1	0	0	0	1	0	3268	0	0	0	0	1	1	0	0	0	1	0	1	0	0	1	0	0	2	2	1	1	2	0	0	2	2	1	0	2
Bacteria;Dependentiae;Babeliae;Babeliales;unknown family;unknown genus;unknown species	OTU_267	0	1	0	1	0	2	0	1	0	0	0	0	2	0	0	1	0	1	3	1	0	1	1	0	0	0	1	0	0	0	0	0	2	1	0	0	0	1	1	1	0	1	1	0	2	1	0	3
Bacteria;Dependentiae;Babeliae;Babeliales;Vermiphilaceae;unknown genus;unknown species	OTU_1262	0	0	0	0	0	0	0	272	0	0	0	0	0	0	0	0	1	0	0	0	0	0	0	0	0	0	0	0	0	0	0	0	0	0	0	0	0	0	0	0	0	0	0	0	0	0	0	0
Bacteria;Elusimicrobia;Lineage IIb;unknown order;unknown family;unknown genus;unknown species	OTU_290	2	1	2	0	0	0	0	1	0	0	1	0	0	0	0	1	0	0	1	1	2	1	0	1	3	1	1	0	0	0	0	0	0	2	0	0	2	0	0	1	0	3	2	0	0	1	1	0
Bacteria;Epsilonbacteraeota;Campylobacteria;Campylobacterales;Arcobacteraceae;Arcobacter;Arcobacter sp.	OTU_1292	0	0	0	0	0	0	0	0	0	0	0	0	0	0	0	1	0	1	0	0	0	1	1	2	0	0	0	3	0	1	0	0	222	0	0	0	0	0	0	0	1	0	0	3	0	1	0	0
Bacteria;Epsilonbacteraeota;Campylobacteria;Campylobacterales;Arcobacteraceae;Arcobacter;bioreactor metagenome	OTU_1115	1	0	3	0	0	0	0	26	5	1	4	0	1	1	0	0	0	1	0	5	1	3	11	27	16	2	0	0	0	0	0	0	0	0	1	0	0	0	0	2	2	4	33	81	52	73	0	1
Bacteria;Epsilonbacteraeota;Campylobacteria;Campylobacterales;Arcobacteraceae;Arcobacter;Multi-affiliation	OTU_228	0	0	1	2	0	1	1	6	821	2	1	1	3	0	0	0	0	0	1	1	3	2	1	2	3	3	0	0	0	0	2	0	4	1	0	0	1180	2	0	0	3	2	2	3	2	4	2	0
Bacteria;Epsilonbacteraeota;Campylobacteria;Campylobacterales;Arcobacteraceae;Arcobacter;unknown species	OTU_8	16	11	36	595	20	1940	37	6641	563	3859	1154	20	53	19	10	27	392	1305	23	56	40	1652	1102	2070	1901	2417	11	0	9	0	12	0	22	11	21	0	45	21	22	23	15	36	19	3577	2976	3037	32	20
Bacteria;Epsilonbacteraeota;Campylobacteria;Campylobacterales;Arcobacteraceae;Arcobacter;unknown species	OTU_28	10	10	423	1274	1672	1555	12	42	7	1064	14	8	339	7	245	8	8	1600	10	10188	3478	2832	563	14	11	13	22	0	4	0	7	0	13	5	12	0	19	10	12	9	4	5	9	44	42	42	9	13
Bacteria;Epsilonbacteraeota;Campylobacteria;Campylobacterales;Arcobacteraceae;Arcobacter;unknown species	OTU_52	4	8	332	12	4	4	7	1320	123	2	428	2	11	1	4	3	2	3	9	728	8	469	2314	1297	871	5	14	0	3	0	2	0	7	1	7	0	9	0	2	2	3	7	7	365	347	376	7	4
Bacteria;Epsilonbacteraeota;Campylobacteria;Campylobacterales;Arcobacteraceae;Arcobacter;unknown species	OTU_143	0	1	1	2	0	1	3	10	4	2	3	2	0	0	0	0	3	1	0	640	4	2	2	3	3	4	1	3	1	23	0	0	301	1	5	1	3038	1	2	0	0	2	0	5	4	6	2	1
Bacteria;Epsilonbacteraeota;Campylobacteria;Campylobacterales;Arcobacteraceae;Arcobacter;unknown species	OTU_175	1	0	1	1	0	1	1	680	3	3	77	0	1	0	0	1	3	1	2	1	4	2	123	279	4	0	0	0	0	0	0	0	0	2	3	0	0	0	0	1	0	1	2	216	207	181	0	1
Bacteria;Epsilonbacteraeota;Campylobacteria;Campylobacterales;Arcobacteraceae;Arcobacter;unknown species	OTU_263	1	1	0	1	0	0	3	2	1023	1	1	0	1	1	0	0	1	1	2	0	1	3	2	2	0	2	1	635	0	2	0	0	61	0	0	1	2	0	0	1	0	10	24	3	3	4	1	2
Bacteria;Epsilonbacteraeota;Campylobacteria;Campylobacterales;Arcobacteraceae;Arcobacter;unknown species	OTU_637	0	0	0	1	0	2	1	0	0	0	1	0	0	0	0	1	0	0	0	1	0	0	445	1	0	2	1	0	1	0	0	0	46	0	1	0	545	0	0	1	1	2	2	1	3	2	0	0
Bacteria;Epsilonbacteraeota;Campylobacteria;Campylobacterales;Arcobacteraceae;Arcobacter;unknown species	OTU_723	0	0	0	0	0	0	0	2	380	0	131	0	2	0	0	0	0	0	0	1	1	1	0	2	0	1	1	0	0	0	1	0	0	0	1	0	1	0	0	0	0	0	0	19	17	14	0	0
Bacteria;Epsilonbacteraeota;Campylobacteria;Campylobacterales;Arcobacteraceae;Arcobacter;unknown species	OTU_874	0	0	4	6	2	7	0	104	7	0	31	1	1	0	0	2	3	1	1	5	5	0	13	17	5	0	1	0	0	0	0	0	2	0	5	0	2	0	1	1	0	1	2	128	129	140	0	0
Bacteria;Epsilonbacteraeota;Campylobacteria;Campylobacterales;Arcobacteraceae;Arcobacter;unknown species	OTU_1257	0	0	0	1	0	0	0	37	0	2	0	0	1	0	0	0	0	1	0	0	0	3	17	16	11	1	0	0	0	0	0	0	0	0	0	0	0	0	0	1	0	0	0	24	22	23	0	0
Bacteria;Epsilonbacteraeota;Campylobacteria;Campylobacterales;Campylobacteraceae;Campylobacter;unknown species	OTU_34	5	1028	144	39	4	686	14	842	248	10	429	8	14	8	2	6	3	1345	12	15	11	9	131	464	8	13	20	0	5	0	9	0	95	6	9	0	657	3	18	11	8	531	536	1318	1610	1471	35	23
Bacteria;Epsilonbacteraeota;Campylobacteria;Campylobacterales;Campylobacteraceae;Campylobacter;unknown species	OTU_543	0	0	2	0	0	0	1	445	0	0	0	0	0	0	0	0	1	0	0	0	1	2	0	0	1	0	0	0	0	0	0	0	0	0	0	0	0	0	0	0	0	0	1	133	147	144	0	2
Bacteria;Epsilonbacteraeota;Campylobacteria;Campylobacterales;Campylobacteraceae;Campylobacter;unknown species	OTU_1059	0	0	0	0	0	1	0	1	0	0	0	0	0	0	0	0	0	0	0	0	1	1	0	2	0	0	0	0	0	0	2	0	0	0	0	0	0	0	0	0	2	0	1	97	114	90	0	0
Bacteria;Epsilonbacteraeota;Campylobacteria;Campylobacterales;Campylobacteraceae;Campylobacter;unknown species	OTU_1508	0	0	8	2	3	1	0	17	0	0	19	2	2	0	0	0	0	0	0	1	0	0	3	1	1	0	0	0	0	0	0	0	3	0	0	0	6	1	0	0	0	2	1	50	67	75	0	1
Bacteria;Epsilonbacteraeota;Campylobacteria;Campylobacterales;Nitratiruptoraceae;Nitratiruptor;unknown species	OTU_92	1	2	1	4	0	7	2	3	0	1	2	3	7	0	0	2	0	4	2	4	2	6	5	1	7	2	2	0	1	0	4	0	82	0	1	0	2	4	5	1	4	2681	574	5	5	6	6	14
Bacteria;Epsilonbacteraeota;Campylobacteria;Campylobacterales;Sulfurospirillaceae;Sulfurospirillum;unknown species	OTU_203	0	0	0	448	1	2	2	554	593	2	300	3	1	0	2	2	1	0	0	3	2	1	3	102	4	0	0	0	0	0	0	0	0	1	0	0	4	0	0	1	0	2	2	76	67	83	2	1
Bacteria;Epsilonbacteraeota;Campylobacteria;Campylobacterales;Sulfurospirillaceae;Sulfurospirillum;unknown species	OTU_529	1	0	0	2	0	0	0	329	0	0	59	0	2	0	0	0	0	0	0	0	0	1	2	1	1	0	2	0	0	0	1	0	0	1	0	0	260	0	2	2	0	23	140	35	40	45	0	0
Bacteria;Epsilonbacteraeota;Campylobacteria;Campylobacterales;Sulfurovaceae;Sulfurovum;Multi-affiliation	OTU_19	5	12	5816	1096	12	2849	22	2669	13	22	2248	14	608	11	6	21	831	10	21	1511	1183	21	2205	23	27	17	243	0	2	0	13	0	22	6	2583	0	14	7	13	9	8	17	6	648	737	662	13	15
Bacteria;Epsilonbacteraeota;Campylobacteria;Campylobacterales;Sulfurovaceae;Sulfurovum;unknown species	OTU_33	11	2	9	487	934	16	19	369	260	10	505	1574	16	3	2	88	6	5	9	15	16	8	619	1461	13	11	4	0	4	0	5	0	9	6	8	0	10	4	8	5	5	19	30	3006	4506	4768	13	11
Bacteria;Epsilonbacteraeota;Campylobacteria;Campylobacterales;Sulfurovaceae;Sulfurovum;unknown species	OTU_63	2	5	129	788	394	6	9	1832	605	4	1752	3	6	6	3	219	1	1	1	9	11	6	1367	9	1093	5	2	0	3	0	4	0	8	2	6	0	9	6	3	4	5	5	4	503	647	561	3	2
Bacteria;Epsilonbacteraeota;Campylobacteria;Campylobacterales;Sulfurovaceae;Sulfurovum;unknown species	OTU_462	1	0	0	0	0	1	2	1	0	0	177	2	1	0	1	221	0	0	1	320	2	2	203	0	1	0	1	0	2	1	0	0	1	0	0	0	1	0	0	0	0	1	2	42	73	80	0	0
Bacteria;Epsilonbacteraeota;Campylobacteria;Campylobacterales;Sulfurovaceae;Sulfurovum;unknown species	OTU_549	0	0	0	0	0	0	1	1	0	0	109	4	0	0	0	0	0	0	1	1	1	0	0	1	1	0	0	0	0	0	0	0	0	1	0	0	0	1	0	0	0	0	1	222	248	282	0	0
Bacteria;Epsilonbacteraeota;Campylobacteria;Campylobacterales;Sulfurovaceae;Sulfurovum;unknown species	OTU_737	0	0	0	0	0	0	1	1	0	0	5	0	1	0	0	1	0	1	0	6	1	0	5	1	0	0	0	1	0	0	0	0	0	0	0	1	1	0	0	0	1	2	4	145	244	250	0	0
Bacteria;Epsilonbacteraeota;Campylobacteria;Campylobacterales;Sulfurovaceae;Sulfurovum;unknown species	OTU_856	0	1	1	0	1	0	0	0	0	0	165	1	1	0	0	0	0	0	0	0	0	0	0	2	1	0	1	0	0	0	0	0	1	0	0	0	0	0	0	1	0	0	1	81	110	90	0	1
Bacteria;Epsilonbacteraeota;Campylobacteria;Campylobacterales;Sulfurovaceae;Sulfurovum;unknown species	OTU_956	0	0	0	0	0	0	1	0	0	0	0	0	0	0	0	0	0	0	0	0	0	0	0	0	0	0	0	0	0	0	0	0	0	0	1	0	0	0	0	0	0	0	0	105	149	152	0	0
Bacteria;Epsilonbacteraeota;Campylobacteria;Campylobacterales;Sulfurovaceae;Sulfurovum;unknown species	OTU_990	0	0	255	0	0	0	0	0	0	0	105	0	2	0	0	0	0	0	0	0	0	0	1	0	1	0	12	0	0	0	0	0	0	0	0	0	0	0	0	0	0	0	0	1	4	4	0	0
Bacteria;Epsilonbacteraeota;Campylobacteria;Campylobacterales;Sulfurovaceae;Sulfurovum;unknown species	OTU_1305	0	2	0	0	0	0	0	0	0	0	0	0	1	0	0	0	0	0	0	0	0	0	0	1	0	0	0	0	0	0	0	0	0	0	0	0	0	0	0	1	0	0	2	12	10	10	0	0
Bacteria;Epsilonbacteraeota;Campylobacteria;Campylobacterales;Sulfurovaceae;Sulfurovum;unknown species	OTU_1530	0	0	1	0	0	0	0	2	0	0	86	0	0	0	0	0	0	0	0	0	0	1	0	2	1	1	0	1	0	2	0	0	59	0	0	0	0	0	4	10	11	0	2	31	48	33	0	1
Bacteria;Epsilonbacteraeota;Campylobacteria;Campylobacterales;Thiovulaceae;Sulfurimonas;Campylobacterales bacterium Ho30-mm	OTU_1091	0	0	0	0	1	1	0	0	0	0	0	0	0	0	0	0	1	0	1	0	0	1	0	0	0	0	0	0	0	0	0	0	0	0	0	0	0	0	1	0	1	64	153	30	29	23	3	0
Bacteria;Epsilonbacteraeota;Campylobacteria;Campylobacterales;Thiovulaceae;Sulfurimonas;Multi-affiliation	OTU_76	2	2	423	622	1	2283	13	1663	5	354	1546	8	16	2	0	200	7	4	520	586	677	6	509	1760	425	3328	13	0	4	0	8	0	5	7	11	0	172	0	11	10	11	16	26	439	403	438	8	6
Bacteria;Epsilonbacteraeota;Campylobacteria;Campylobacterales;Thiovulaceae;Sulfurimonas;Sulfurimonas sp.	OTU_774	0	0	1	1	0	0	0	0	0	2	1	0	0	0	0	0	0	0	0	1	1	0	1	1	2	0	0	0	0	0	0	0	0	0	0	0	0	0	0	1	0	3	0	170	167	178	0	0
Bacteria;Epsilonbacteraeota;Campylobacteria;Campylobacterales;Thiovulaceae;Sulfurimonas;unknown species	OTU_30	8	3	582	1960	2	16	7606	431	7	7	165	7	575	861	1	5	2	2	847	1105	3980	8	1464	191	390	13	29	0	3	0	7	0	13	5	3	0	10	5	6	2	6	11	8	98	123	127	9	12
Bacteria;Epsilonbacteraeota;Campylobacteria;Campylobacterales;Thiovulaceae;Sulfurimonas;unknown species	OTU_41	7	3	299	267	4	12	18	7662	8	6	818	10	13	6	13	62	4	2	20	25	145	12	804	397	1272	871	9	0	0	0	3	0	8	5	17	0	13	4	6	9	5	13	22	208	166	226	6	3
Bacteria;Epsilonbacteraeota;Campylobacteria;Campylobacterales;Thiovulaceae;Sulfurimonas;unknown species	OTU_83	2	1	396	5	1	9	1	445	344	679	274	2	5	1	1	2	0	1	11	6	3	4	216	116	7	1264	22	0	3	0	3	0	3	2	3	0	1	2	1	3	4	3	2	560	690	717	6	5
Bacteria;Epsilonbacteraeota;Campylobacteria;Campylobacterales;Thiovulaceae;Sulfurimonas;unknown species	OTU_90	6	3	377	715	3	8	368	2754	483	8	384	6	189	221	513	45	0	4	98	232	21	914	377	883	18	541	15	0	3	0	2	0	20	6	659	0	6	8	4	12	8	23	48	228	213	227	9	10
Bacteria;Epsilonbacteraeota;Campylobacteria;Campylobacterales;Thiovulaceae;Sulfurimonas;unknown species	OTU_134	4	1	1	2	1	4	420	370	1	2	4	0	3	4	0	1	2	1	3	326	5	4	171	410	2	3	0	0	0	0	0	0	2	0	0	0	3	2	2	1	0	1	2	488	592	463	3	1
Bacteria;Epsilonbacteraeota;Campylobacteria;Campylobacterales;Thiovulaceae;Sulfurimonas;unknown species	OTU_149	2	1	152	4	0	2	3	256	1	2	133	0	1	1	1	2	0	0	4	7	4	1	167	360	279	1020	7	0	0	0	0	0	1	0	0	0	1	0	3	0	3	18	32	151	83	98	3	1
Bacteria;Epsilonbacteraeota;Campylobacteria;Campylobacterales;Thiovulaceae;Sulfurimonas;unknown species	OTU_220	1	0	0	0	0	1	2	485	0	2	3	724	2	0	1	3	0	1	0	1	1	1	153	4	2	372	1	0	1	0	1	0	2	1	0	0	2	0	0	0	0	0	4	54	63	58	0	1
Bacteria;Epsilonbacteraeota;Campylobacteria;Campylobacterales;Thiovulaceae;Sulfurimonas;unknown species	OTU_227	0	0	3	2	1	0	2	2	0	1	0	2	1	1	0	0	0	0	0	1	1	1	1	1	2	1	6	0	0	0	0	0	0	0	1	0	1	1	0	0	0	1	1	1	4	1	3	1
Bacteria;Epsilonbacteraeota;Campylobacteria;Campylobacterales;Thiovulaceae;Sulfurimonas;unknown species	OTU_232	0	0	1	0	2	1	2	192	0	0	224	0	3	0	0	0	0	0	1	2	4	2	1	122	0	2	0	0	0	0	0	0	0	0	1	0	3	0	0	0	0	3	0	522	478	442	0	0
Bacteria;Epsilonbacteraeota;Campylobacteria;Campylobacterales;Thiovulaceae;Sulfurimonas;unknown species	OTU_332	0	1	2	315	0	0	2	309	0	0	157	1	2	2	0	2	0	0	0	1	1	1	3	391	2	0	0	0	0	0	0	0	0	0	1	0	1	0	1	0	0	0	0	57	50	51	2	2
Bacteria;Epsilonbacteraeota;Campylobacteria;Campylobacterales;Thiovulaceae;Sulfurimonas;unknown species	OTU_342	1	0	0	1	0	1	2	8	1	0	3	1	0	0	1	2	0	0	1	2	1	1	3	2	1	1	0	0	1	0	1	0	0	0	1	0	575	1	15	10	7	176	568	53	53	48	7	10
Bacteria;Epsilonbacteraeota;Campylobacteria;Campylobacterales;Thiovulaceae;Sulfurimonas;unknown species	OTU_370	1	0	0	2	0	0	3	2	2	0	122	1	2	0	0	0	0	1	0	2	0	0	238	126	0	839	0	0	0	0	0	0	1	0	0	0	0	0	1	4	1	1	2	23	31	28	1	1
Bacteria;Epsilonbacteraeota;Campylobacteria;Campylobacterales;Thiovulaceae;Sulfurimonas;unknown species	OTU_396	0	0	1	1	1	0	418	1	0	0	0	0	2	0	0	1	0	1	0	1	3	608	1	0	1	2	0	0	0	0	0	0	0	0	2	0	0	0	0	0	0	1	1	88	91	91	1	0
Bacteria;Epsilonbacteraeota;Campylobacteria;Campylobacterales;Thiovulaceae;Sulfurimonas;unknown species	OTU_469	0	1	1	1	1	0	0	1	1	1	0	1	1	0	1	0	0	0	1	0	989	0	2	2	1	2	0	0	0	0	1	0	1	0	2	0	1	1	14	4	4	14	10	12	10	9	0	0
Bacteria;Epsilonbacteraeota;Campylobacteria;Campylobacterales;Thiovulaceae;Sulfurimonas;unknown species	OTU_681	0	0	0	0	0	1	2	434	0	1	0	1	0	0	0	1	0	1	1	0	0	0	1	1	0	1	0	0	0	0	1	0	0	1	0	0	0	0	0	0	0	0	1	173	195	151	1	2
Bacteria;Epsilonbacteraeota;Campylobacteria;Campylobacterales;Thiovulaceae;Sulfurimonas;unknown species	OTU_699	0	0	0	2	0	0	0	0	0	1	1	0	0	0	0	1	0	0	0	1	1	0	0	181	1	0	0	0	0	0	0	0	0	1	1	0	0	0	0	0	0	1	2	127	111	116	2	3
Bacteria;Epsilonbacteraeota;Campylobacteria;Campylobacterales;Thiovulaceae;Sulfurimonas;unknown species	OTU_749	0	0	0	0	0	2	2	1	0	0	215	0	1	1	0	0	0	0	0	0	0	0	0	166	1	0	0	0	0	0	0	0	0	0	0	0	0	0	1	0	0	1	0	64	54	55	0	1
Bacteria;Epsilonbacteraeota;Campylobacteria;Campylobacterales;Thiovulaceae;Sulfurimonas;unknown species	OTU_862	0	0	0	0	0	0	0	154	0	0	1	0	0	0	0	1	1	0	0	2	0	0	0	217	0	0	0	0	0	0	0	0	1	0	0	0	0	0	0	0	1	0	0	22	22	19	1	0
Bacteria;Epsilonbacteraeota;Campylobacteria;Campylobacterales;Thiovulaceae;Sulfurimonas;unknown species	OTU_902	0	1	0	0	0	0	0	1	0	1	0	0	1	0	1	0	0	1	0	1	0	0	1	0	0	2	0	0	0	0	0	0	0	0	0	0	105	0	1	3	1	84	194	8	1	3	2	1
Bacteria;Epsilonbacteraeota;Campylobacteria;Campylobacterales;Thiovulaceae;Sulfurimonas;unknown species	OTU_930	0	0	0	0	0	1	0	206	0	0	0	0	0	0	0	0	0	0	0	0	0	0	0	0	0	1	0	0	0	0	0	0	1	0	0	0	0	0	0	1	0	0	0	38	45	54	0	0
Bacteria;Epsilonbacteraeota;Campylobacteria;Campylobacterales;Thiovulaceae;Sulfurimonas;unknown species	OTU_1054	1	0	0	0	0	1	0	0	0	0	0	0	0	0	0	0	0	0	0	2	0	0	0	0	0	0	0	0	0	0	0	0	0	0	0	0	0	0	0	0	0	6	12	2	1	0	0	0
Bacteria;Epsilonbacteraeota;Campylobacteria;Campylobacterales;Thiovulaceae;Sulfurimonas;unknown species	OTU_1134	0	0	0	0	0	0	0	2	0	0	0	0	0	0	1	0	0	0	0	0	0	1	0	269	0	0	0	0	0	0	0	0	0	0	1	0	0	0	0	0	0	2	5	1	1	1	0	0
Bacteria;Epsilonbacteraeota;Campylobacteria;Campylobacterales;Thiovulaceae;Sulfurimonas;unknown species	OTU_1182	0	0	0	0	0	0	2	2	0	1	84	0	0	0	0	0	0	0	0	0	0	0	195	1	0	0	0	0	0	0	0	0	1	0	1	0	0	0	0	0	0	0	0	1	3	1	0	0
Bacteria;Epsilonbacteraeota;Campylobacteria;Campylobacterales;Thiovulaceae;Sulfurimonas;unknown species	OTU_1192	0	0	0	0	0	0	0	55	0	0	0	0	0	0	0	0	1	1	0	0	1	0	0	125	0	0	0	0	0	0	0	0	0	1	1	0	0	0	0	0	0	0	0	2	2	3	0	0
Bacteria;Epsilonbacteraeota;Campylobacteria;Campylobacterales;Thiovulaceae;Sulfurimonas;unknown species	OTU_1216	0	1	0	1	0	1	0	0	0	0	0	0	1	0	0	0	0	0	0	0	0	0	1	0	0	0	0	0	0	0	0	0	0	0	0	0	0	0	0	0	0	0	2	1	1	2	0	0
Bacteria;Fibrobacteres;Chitinivibrionia;Chitinivibrionales;Chitinivibrionaceae;possible genus 03;unknown species	OTU_395	1	0	0	1	0	0	1	0	0	0	0	0	1	0	0	0	0	0	0	1	0	0	0	0	0	0	0	0	0	0	1	0	0	0	1291	0	0	1	0	1	1	3	11	5	2	15	0	1
Bacteria;Fibrobacteres;Chitinivibrionia;Chitinivibrionales;Chitinivibrionaceae;possible genus 03;unknown species	OTU_897	0	0	1	0	0	1	0	0	0	0	0	0	0	2	0	0	0	0	0	1	447	1	0	0	0	0	0	0	0	0	0	0	0	0	2	0	0	0	0	1	0	0	3	3	0	0	0	0
Bacteria;Fibrobacteres;Chitinivibrionia;Chitinivibrionales;Chitinivibrionaceae;possible genus 03;unknown species	OTU_922	0	0	0	0	0	0	0	0	0	0	0	0	0	0	0	457	0	0	0	0	0	0	0	0	1	0	0	0	0	0	0	0	0	0	0	0	0	0	0	0	0	0	0	0	0	0	0	0
Bacteria;Fibrobacteres;Chitinivibrionia;Chitinivibrionales;Chitinivibrionaceae;possible genus 03;unknown species	OTU_1338	0	0	0	0	0	0	0	0	0	0	0	0	0	0	0	244	0	0	0	0	0	0	0	0	0	0	0	0	0	0	0	0	0	0	0	0	0	0	0	0	0	1	0	0	0	0	0	1
Bacteria;Fibrobacteres;Chitinivibrionia;Chitinivibrionales;Chitinivibrionaceae;possible genus 03;unknown species	OTU_1489	0	0	0	0	0	0	0	0	0	0	0	0	0	0	0	253	0	0	0	0	0	0	0	0	0	0	0	0	0	0	0	0	0	0	0	0	0	0	0	0	0	0	0	0	2	1	0	0
Bacteria;Fibrobacteres;Fibrobacteria;Fibrobacterales;TG3;unknown genus;unknown species	OTU_385	1	0	0	2	1	2	1	1227	0	0	60	0	1	0	0	0	0	0	0	3	1	0	123	1	0	1	0	0	0	0	0	0	0	0	0	0	2	0	0	0	0	0	0	2	4	0	0	0
Bacteria;Fibrobacteres;Fibrobacteria;Fibrobacterales;TG3;unknown genus;unknown species	OTU_701	1	0	0	623	0	0	0	0	0	0	0	0	1	0	0	0	0	0	0	1	0	0	0	0	0	0	0	0	0	0	0	0	0	0	0	0	0	0	0	0	0	12	14	4	5	8	8	8
Bacteria;Firmicutes;Bacilli;Bacillales;Bacillaceae;Anoxybacillus;Multi-affiliation	OTU_341	0	0	0	1	1	3	450	2	2	2	0	0	2	0	0	0	0	0	0	659	1	392	0	0	0	2	0	59	0	0	0	0	0	0	1	1	1	0	0	1	0	1	0	0	0	0	0	2
Bacteria;Firmicutes;Bacilli;Bacillales;Bacillaceae;Anoxybacillus;unknown species	OTU_634	0	0	0	0	0	0	0	0	0	0	0	0	0	0	0	0	0	0	0	0	0	0	0	0	0	0	0	31	0	0	0	0	0	0	0	629	0	0	0	0	0	0	0	0	0	0	0	0
Bacteria;Firmicutes;Bacilli;Bacillales;Bacillaceae;Bacillus;Multi-affiliation	OTU_37	16	4	3	593	2	2420	92	207	2	224	8	6	1833	4	957	8	9	2	394	432	3	4563	3	6	8	4	3	1	3	0	6	0	7	3	1993	440	10	882	10	5	4	7	3	3	10	5	7	7
Bacteria;Firmicutes;Bacilli;Bacillales;Bacillaceae;Bacillus;Multi-affiliation	OTU_88	7	2	1	5	0	7	1	2	0	2	0	0	4	1	0	5	0	3	0	5	2	7	4	0	5	1	0	0	1	0	3	0	1	9	5	0	3	1	84	0	2	3	2	1	3	5	5	6
Bacteria;Firmicutes;Bacilli;Bacillales;Bacillaceae;Bacillus;Multi-affiliation	OTU_96	0	0	0	0	0	0	0	0	0	0	0	0	0	0	0	0	0	0	0	0	0	0	0	0	0	0	0	0	0	1	0	5079	0	0	0	1	0	0	0	0	0	0	0	0	0	0	0	0
Bacteria;Firmicutes;Bacilli;Bacillales;Bacillaceae;Bacillus;Multi-affiliation	OTU_110	0	0	0	0	0	0	0	0	0	0	0	0	0	0	0	0	0	0	0	0	0	0	0	0	0	0	0	0	0	1	0	1	0	0	0	4516	0	0	0	0	0	0	0	0	0	0	0	0
Bacteria;Firmicutes;Bacilli;Bacillales;Bacillaceae;Bacillus;Multi-affiliation	OTU_127	0	0	0	0	0	0	0	0	0	0	0	0	0	0	0	0	0	0	0	0	0	0	0	0	0	0	0	0	0	0	0	1	0	0	0	3645	0	0	0	0	0	0	0	0	0	0	0	0
Bacteria;Firmicutes;Bacilli;Bacillales;Bacillaceae;Bacillus;Multi-affiliation	OTU_450	0	0	0	0	0	0	0	0	0	0	0	0	0	0	0	0	0	0	0	0	0	0	0	0	0	0	0	0	0	0	0	2844	0	0	0	0	0	0	0	0	0	0	0	0	0	0	0	0
Bacteria;Firmicutes;Bacilli;Bacillales;Bacillaceae;Bacillus;Multi-affiliation	OTU_540	0	0	0	0	0	0	0	0	0	0	1	0	4	0	0	0	0	0	0	0	0	987	0	0	1	0	0	0	0	0	0	0	0	0	3	1	0	0	0	0	0	0	0	0	1	0	1	0
Bacteria;Firmicutes;Bacilli;Bacillales;Bacillaceae;Bacillus;Multi-affiliation	OTU_939	0	0	0	0	0	0	0	0	0	0	0	0	0	0	0	0	0	0	0	0	0	0	0	0	0	0	0	0	0	0	0	381	0	0	0	0	0	0	0	0	0	0	0	0	0	0	0	0
Bacteria;Firmicutes;Bacilli;Bacillales;Bacillaceae;Bacillus;Multi-affiliation	OTU_1065	0	0	0	0	0	0	0	1	0	0	0	0	678	0	0	0	1	0	0	0	0	0	1	0	1	0	0	0	0	0	0	0	1	0	0	0	0	0	1	2	0	2	0	0	0	0	0	0
Bacteria;Firmicutes;Bacilli;Bacillales;Bacillaceae;Bacillus;unknown species	OTU_294	1781	0	1	1	0	1	0	0	0	0	0	0	0	0	0	0	1	0	0	2	0	0	1	1	0	0	0	0	0	0	2	0	0	0	0	0	0	1	0	1	1	1	0	0	1	1	0	0
Bacteria;Firmicutes;Bacilli;Bacillales;Bacillaceae;Bacillus;unknown species	OTU_878	1	0	0	0	0	0	0	1	0	0	0	0	0	0	0	0	0	0	2	0	0	483	0	0	0	0	0	0	0	0	1	0	0	0	0	0	0	0	0	0	0	0	0	0	0	0	0	0
Bacteria;Firmicutes;Bacilli;Bacillales;Bacillaceae;Caldibacillus;unknown species	OTU_605	1	0	0	0	0	0	0	0	0	1	0	0	0	0	0	1	0	0	1	0	526	0	0	266	0	0	0	0	1	0	0	0	0	2	0	81	0	0	1	0	1	1	0	0	0	1	1	0
Bacteria;Firmicutes;Bacilli;Bacillales;Bacillaceae;Geobacillus;Multi-affiliation	OTU_556	0	1	152	0	1	2	0	0	0	1	0	0	0	0	0	0	1	0	0	351	2	0	3	1	0	0	8	0	1	0	0	1	0	1	1	6	0	0	8	1	0	0	1	2	0	1	0	0
Bacteria;Firmicutes;Bacilli;Bacillales;Bacillaceae;Geomicrobium;Multi-affiliation	OTU_205	0	0	0	0	0	0	0	0	0	0	0	0	0	0	0	0	0	0	0	0	0	0	0	0	0	0	0	0	0	0	0	2251	0	0	0	0	0	0	0	0	0	0	0	0	0	0	0	0
Bacteria;Firmicutes;Bacilli;Bacillales;Family X;Thermicanus;unknown species	OTU_179	0	0	0	0	1	1	264	0	0	0	1	0	2	0	0	1	2	0	0	1	1	3223	0	3	2	0	0	334	1	0	0	1	4	1	0	248	2	0	1	1	1	1	0	0	2	1	1	1
Bacteria;Firmicutes;Bacilli;Bacillales;Family XI;Gemella;Multi-affiliation	OTU_328	0	1	0	1	0	0	1	0	0	0	0	0	1	1	1	0	0	0	2	0	1	2	1	1	0	0	0	0	1	0	1	0	0	1622	0	1	0	1	1	1	0	0	0	0	0	1	1	0
Bacteria;Firmicutes;Bacilli;Bacillales;Paenibacillaceae;Paenibacillus;Multi-affiliation	OTU_765	0	0	0	0	0	0	0	1	0	25	0	1	0	0	0	0	0	0	0	1	0	583	0	0	0	0	0	0	0	0	0	0	0	0	0	0	0	2	0	2	0	1	1	0	0	0	0	0
Bacteria;Firmicutes;Bacilli;Bacillales;Paenibacillaceae;Paenibacillus;Paenibacillus barengoltzii	OTU_858	0	0	0	0	0	0	0	0	0	0	1	0	1	0	0	0	0	0	0	0	0	497	0	0	1	0	0	0	0	0	0	0	0	0	0	0	0	0	0	0	0	0	0	0	0	1	0	0
Bacteria;Firmicutes;Bacilli;Bacillales;Staphylococcaceae;Staphylococcus;Multi-affiliation	OTU_452	3	2	0	353	0	1	0	0	0	0	1	1	0	0	0	1	2	3	1	4	0	0	491	102	1	22	0	1	0	156	3	1	1	0	1	0	1	0	1	0	1	0	0	0	0	0	1	0
Bacteria;Firmicutes;Bacilli;Bacillales;Staphylococcaceae;Staphylococcus;Multi-affiliation	OTU_1692	17	7	4	8	3	30	25	4	7	9	3	5	7	17	3	0	3	5	12	9	5	5	6	3	20	9	13	1	4	2	16	0	8	4	4	0	5	13	2	0	0	4	1	2	2	4	3	1
Bacteria;Firmicutes;Bacilli;Bacillales;Staphylococcaceae;Staphylococcus;unknown species	OTU_731	0	0	0	0	0	0	0	0	0	0	0	0	0	0	0	0	0	0	0	0	0	0	0	0	0	0	0	1	0	1	0	557	0	0	0	0	0	0	0	0	0	0	0	0	0	0	0	0
Bacteria;Firmicutes;Bacilli;Bacillales;Thermoactinomycetaceae;Kroppenstedtia;Kroppenstedtia guangzhouensis	OTU_574	0	0	0	0	0	0	0	0	0	0	0	0	0	0	0	0	0	0	0	0	0	0	0	0	0	0	0	0	0	0	0	0	0	0	0	769	0	0	0	0	0	0	0	0	0	0	0	0
Bacteria;Firmicutes;Bacilli;Bacillales;Thermoactinomycetaceae;Planifilum;Multi-affiliation	OTU_472	0	0	0	0	0	0	0	0	0	0	0	0	0	0	0	0	0	0	0	0	0	0	0	0	0	0	0	0	0	0	0	1044	0	0	0	1	0	0	0	0	0	0	0	0	0	0	0	0
Bacteria;Firmicutes;Bacilli;Bacillales;Thermoactinomycetaceae;Planifilum;unknown species	OTU_301	0	0	0	0	0	0	0	0	0	0	0	0	0	0	0	0	0	0	0	222	0	0	0	0	0	0	0	0	0	4	0	1543	0	0	0	908	0	0	0	0	0	0	0	0	0	0	1	0
Bacteria;Firmicutes;Bacilli;Bacillales;Thermoactinomycetaceae;Risungbinella;Risungbinella massiliensis	OTU_1157	0	0	0	0	0	0	0	0	0	0	0	0	0	0	0	0	0	0	0	0	0	0	0	0	0	0	0	0	0	0	0	0	0	0	0	262	0	0	0	0	0	0	0	0	0	0	0	0
Bacteria;Firmicutes;Bacilli;Bacillales;Thermoactinomycetaceae;Thermoactinomyces;Multi-affiliation	OTU_917	0	0	0	0	0	0	0	1	0	0	1	0	0	0	412	1	1	1	0	0	0	1	0	0	0	0	0	0	0	0	0	0	0	0	0	0	0	0	0	1	0	0	0	0	0	0	0	1
Bacteria;Firmicutes;Bacilli;Bacillales;Thermoactinomycetaceae;unknown genus;unknown species	OTU_1277	0	0	0	0	0	0	0	0	0	0	0	0	1	0	0	0	0	0	0	0	0	0	0	0	0	0	0	0	0	0	0	0	0	0	0	0	0	0	3	0	0	0	0	0	0	1	0	0
Bacteria;Firmicutes;Bacilli;Lactobacillales;Aerococcaceae;Globicatella;Multi-affiliation	OTU_295	0	0	0	0	0	0	0	0	0	0	0	0	0	0	0	0	0	0	0	0	0	0	0	0	0	0	0	1	0	0	0	1212	0	0	0	483	0	0	0	0	0	0	0	0	0	0	0	0
Bacteria;Firmicutes;Bacilli;Lactobacillales;Aerococcaceae;Ignavigranum;unknown species	OTU_1058	0	0	0	1	0	1	0	0	0	0	1	1	353	0	0	0	0	0	0	0	0	2	0	0	0	0	0	0	0	0	0	0	0	0	0	0	1	0	0	0	0	0	0	1	0	0	0	0
Bacteria;Firmicutes;Bacilli;Lactobacillales;Carnobacteriaceae;Alloiococcus;unknown species	OTU_711	0	0	0	0	0	0	0	0	0	0	0	0	1	0	0	0	0	0	0	0	0	655	0	0	0	0	0	0	0	0	0	0	1	0	0	0	0	0	0	0	0	0	0	0	1	0	0	1
Bacteria;Firmicutes;Bacilli;Lactobacillales;Carnobacteriaceae;Atopostipes;Firmicutes oral clone BX005	OTU_1126	0	0	0	0	0	0	0	0	0	0	0	0	0	0	0	0	0	0	0	0	0	0	0	0	0	0	0	394	0	0	0	0	0	0	0	0	0	0	0	0	0	0	0	0	0	0	0	0
Bacteria;Firmicutes;Bacilli;Lactobacillales;Carnobacteriaceae;Atopostipes;unknown species	OTU_508	1	0	0	0	0	0	0	2	0	1	0	0	1	0	0	2	0	1004	1	0	0	1	0	0	0	1	0	0	1	0	0	0	1	0	1	0	1	0	0	1	0	0	0	2	0	0	1	0
Bacteria;Firmicutes;Bacilli;Lactobacillales;Carnobacteriaceae;Lacticigenium;unknown species	OTU_526	0	1	0	1	0	0	0	0	0	0	0	1	1	0	0	1	0	1	0	0	0	2	0	1	0	0	0	0	0	0	0	0	0	3	0	0	0	0	19	1	0	0	1	0	1	0	1	0
Bacteria;Firmicutes;Bacilli;Lactobacillales;Carnobacteriaceae;Marinilactibacillus;Multi-affiliation	OTU_991	0	1	0	0	0	0	0	0	0	0	0	0	359	0	0	0	0	0	0	0	0	0	0	0	1	0	0	0	0	0	1	0	0	0	0	0	0	0	0	0	0	1	0	0	0	0	1	0
Bacteria;Firmicutes;Bacilli;Lactobacillales;Enterococcaceae;Enterococcus;Multi-affiliation	OTU_62	4	2	0	867	2	431	3	4	1	52	1	1	3	0	0	1	2	2	4	2092	1	4108	0	2	1	0	2	0	0	0	3	279	0	1	2	6	8	972	0	2	2	2	1	1	1	1	1	5
Bacteria;Firmicutes;Bacilli;Lactobacillales;Enterococcaceae;Enterococcus;Multi-affiliation	OTU_782	0	0	0	0	0	0	0	0	0	0	0	0	0	0	0	0	0	0	0	0	0	0	0	0	0	0	0	0	0	0	0	0	0	0	0	505	0	0	0	0	0	0	0	0	0	0	0	0
Bacteria;Firmicutes;Bacilli;Lactobacillales;Lactobacillaceae;Lactobacillus;Multi-affiliation	OTU_854	0	0	0	0	0	1	0	0	0	0	0	0	1	0	0	0	0	0	1	0	0	1	0	0	0	0	0	0	507	0	0	0	0	0	1	0	0	0	0	0	0	0	0	1	0	0	0	1
Bacteria;Firmicutes;Bacilli;Lactobacillales;Lactobacillaceae;Lactobacillus;Multi-affiliation	OTU_949	0	0	0	0	0	0	0	0	0	0	0	0	0	0	0	0	0	0	0	0	0	0	0	0	0	0	0	0	0	0	0	363	0	0	0	0	0	0	0	0	0	0	0	0	0	0	0	0
Bacteria;Firmicutes;Bacilli;Lactobacillales;Leuconostocaceae;Leuconostoc;Multi-affiliation	OTU_514	0	0	1	1	0	1	0	0	0	0	0	0	1	0	0	1	0	0	0	0	1	0	0	136	0	0	0	0	0	1	1	0	0	1	0	0	0	1013	0	1	1	0	0	0	0	0	0	0
Bacteria;Firmicutes;Bacilli;Lactobacillales;Leuconostocaceae;Weissella;Multi-affiliation	OTU_1031	0	0	0	0	0	0	0	0	0	0	0	0	0	0	0	0	0	0	0	0	0	0	0	0	0	0	0	325	0	1	0	0	0	0	0	0	0	0	0	0	0	0	0	0	0	0	0	0
Bacteria;Firmicutes;Bacilli;Lactobacillales;Streptococcaceae;Streptococcus;Multi-affiliation	OTU_78	4	0	0	315	0	2	2	0	2	972	1	0	2	1	1	2	310	1	584	1507	852	6	0	589	5	2	1	217	0	554	0	0	1	0	1	616	3	2	0	0	0	2	0	1	0	2	0	4
Bacteria;Firmicutes;Bacilli;Lactobacillales;Streptococcaceae;Streptococcus;Multi-affiliation	OTU_82	0	0	16	0	1	4	746	2	2	2	2	1	2	1	0	1	1	1	1324	7	3	5	5	5	788	3	1155	0	2	1	0	0	1	3	1	0	2	3	4	2	1	1	0	3	1	3	3	5
Bacteria;Firmicutes;Bacilli;Lactobacillales;Streptococcaceae;Streptococcus;Multi-affiliation	OTU_726	0	0	0	0	0	0	2	0	0	0	0	0	1	0	0	0	0	0	1	0	0	0	0	612	0	0	1	0	1	1	1	0	0	0	0	0	0	1	1	0	1	0	0	1	0	0	0	1
Bacteria;Firmicutes;Bacilli;Lactobacillales;Streptococcaceae;Streptococcus;Multi-affiliation	OTU_1129	0	0	0	0	0	0	0	0	0	0	0	0	0	0	0	0	0	0	0	0	0	0	0	0	0	0	0	0	0	289	0	0	0	0	0	0	0	0	0	0	0	0	0	0	0	0	0	0
Bacteria;Firmicutes;Clostridia;Clostridiales;Clostridiaceae 1;Clostridium sensu stricto 9;unknown species	OTU_817	1	0	0	0	0	497	0	0	0	0	0	0	0	0	0	0	0	0	0	0	0	0	2	0	0	0	0	0	0	0	0	0	1	0	0	0	0	0	1	0	0	0	0	0	0	1	0	0
Bacteria;Firmicutes;Clostridia;Clostridiales;Clostridiaceae 1;unknown genus;unknown species	OTU_745	0	0	0	1	0	0	0	0	0	0	0	0	0	0	0	0	0	0	0	0	0	0	576	1	2	0	1	0	0	0	0	0	0	0	0	0	0	0	0	0	0	1	0	0	0	0	0	2
Bacteria;Firmicutes;Clostridia;Clostridiales;Family XI;Anaerococcus;Multi-affiliation	OTU_291	0	2	1	0	0	1	3	0	1	1	0	1740	2	2	1	0	0	0	1	3	1	0	2	2	2	0	0	0	0	0	1	0	3	2	1	0	0	0	2	1	0	1	1	0	4	0	1	1
Bacteria;Firmicutes;Clostridia;Clostridiales;Family XI;Anaerococcus;Multi-affiliation	OTU_833	0	0	0	0	1	0	1	0	0	249	0	2	0	218	0	0	0	0	0	0	0	0	0	0	0	1	0	0	0	0	0	0	2	0	0	0	1	0	0	0	0	0	0	0	0	0	1	0
Bacteria;Firmicutes;Clostridia;Clostridiales;Family XI;Anaerococcus;unknown species	OTU_485	0	0	0	0	0	1	0	0	1	4	3	3	2	1	4	2	2	1	3	4	2	1	3	2	2	0	2	0	0	0	0	0	1	0	0	0	121	0	0	1	1	0	1	0	0	1	3	1
Bacteria;Firmicutes;Clostridia;Clostridiales;Family XI;Anaerococcus;unknown species	OTU_722	1	0	0	0	0	0	1	0	0	0	0	1	1	0	0	1	1	0	0	2	1	1	0	0	0	0	0	0	0	0	0	0	1	0	1	0	0	0	1	0	0	1	0	0	0	0	0	0
Bacteria;Firmicutes;Clostridia;Clostridiales;Family XI;Anaerococcus;unknown species	OTU_793	1	0	0	0	0	0	0	0	0	0	0	0	0	0	1	0	523	0	0	0	0	1	2	0	0	2	0	0	0	0	0	0	0	0	0	0	0	1	0	1	0	2	0	0	0	0	1	1
Bacteria;Firmicutes;Clostridia;Clostridiales;Family XI;Anaerococcus;unknown species	OTU_1089	0	1	0	0	1	0	0	0	0	1	0	0	0	0	237	0	1	0	0	1	0	0	1	0	0	0	0	0	1	0	0	178	58	0	0	0	2	0	0	0	0	0	0	0	0	0	0	0
Bacteria;Firmicutes;Clostridia;Clostridiales;Family XI;Anaerococcus;unknown species	OTU_1219	0	0	0	0	0	0	0	0	0	0	0	0	0	0	0	0	1	0	0	0	0	1	281	0	1	0	0	0	0	0	0	0	0	0	0	0	0	0	0	0	0	0	0	0	0	0	1	0
Bacteria;Firmicutes;Clostridia;Clostridiales;Family XI;Ezakiella;Multi-affiliation	OTU_238	0	2	0	2	0	0	1	2	0	0	0	1	0	1	0	1	0	0	0	2	2	1	0	0	2	1	1	0	1	0	0	0	0	1	0	0	1	2	1	1	1	1	2	0	2	2	1	0
Bacteria;Firmicutes;Clostridia;Clostridiales;Family XI;Finegoldia;Multi-affiliation	OTU_398	0	1	0	0	0	0	1	2	0	0	1	0	2	414	0	1	0	0	835	0	0	1	1	0	1	0	0	0	0	0	1	0	0	0	0	0	0	1	0	1	0	0	0	0	1	0	3	0
Bacteria;Firmicutes;Clostridia;Clostridiales;Family XI;Helcococcus;unknown species	OTU_908	0	1	0	0	0	1	0	0	1	0	1	0	0	0	445	0	0	0	0	0	0	0	0	0	0	1	1	0	0	0	0	0	0	0	0	0	0	1	0	0	0	0	0	0	0	0	1	0
Bacteria;Firmicutes;Clostridia;Clostridiales;Family XI;Peptoniphilus;Multi-affiliation	OTU_499	0	0	0	0	0	1	0	2	0	0	0	0	1	576	1	0	0	0	0	466	0	0	1	0	1	0	0	0	0	0	0	0	1	0	0	1	1	0	0	0	1	1	0	0	0	0	0	0
Bacteria;Firmicutes;Clostridia;Clostridiales;Lachnospiraceae;Multi-affiliation;Multi-affiliation	OTU_668	2	0	1	0	0	0	0	1	0	0	1	1	0	0	0	0	1	0	0	662	0	0	0	0	0	0	0	0	0	0	0	0	1	0	0	0	1	0	1	2	0	1	0	0	0	0	0	0
Bacteria;Firmicutes;Clostridia;Clostridiales;Lachnospiraceae;unknown genus;unknown species	OTU_646	0	0	0	0	1	0	0	0	0	1	0	0	0	0	0	0	0	0	0	0	2	0	0	0	0	0	0	0	1	0	0	0	0	0	0	0	1	0	1	0	1	1	0	1	0	1	0	0
Bacteria;Firmicutes;Clostridia;Clostridiales;Lachnospiraceae;Vallitalea;unknown species	OTU_567	0	0	0	0	0	0	0	1	0	0	0	0	0	1	0	1	1	0	0	0	0	0	2	0	0	0	0	0	0	0	0	0	2	0	0	0	1	0	0	0	0	0	1	1	0	0	3	0
Bacteria;Firmicutes;Clostridia;Clostridiales;Multi-affiliation;Multi-affiliation;Multi-affiliation	OTU_430	1	1	1	5	0	2	2	0	0	0	0	1154	1	2	1	0	0	0	0	2	0	1	3	0	2	0	1	0	1	0	1	0	2	1	0	0	3	0	0	1	3	2	0	1	2	0	0	1
Bacteria;Firmicutes;Clostridia;Clostridiales;Ruminococcaceae;CAG-352;unknown species	OTU_1070	0	0	0	0	0	0	0	0	0	0	0	0	1	2	0	0	0	0	0	0	0	0	0	0	0	0	0	0	0	0	1	0	0	0	0	0	0	0	2	0	0	0	0	0	0	0	1	0
Bacteria;Firmicutes;Clostridia;Clostridiales;Ruminococcaceae;Ruminococcaceae NK4A214 group;unknown species	OTU_824	0	0	0	0	0	0	0	0	0	0	0	0	0	0	0	0	0	0	0	0	0	0	0	0	0	0	0	0	0	0	0	0	0	0	0	444	0	0	0	0	0	0	0	0	0	0	0	0
Bacteria;Firmicutes;Clostridia;Clostridiales;Ruminococcaceae;Saccharofermentans;unknown species	OTU_803	0	0	0	0	0	0	0	0	0	0	0	0	0	0	0	0	0	0	0	0	0	0	0	0	0	0	0	0	0	0	0	0	0	0	0	459	0	0	0	0	0	0	0	0	0	0	0	0
Bacteria;Firmicutes;Erysipelotrichia;Erysipelotrichales;Erysipelotrichaceae;Multi-affiliation;Multi-affiliation	OTU_577	0	0	0	0	0	0	2	0	0	1	0	0	0	0	0	0	0	0	985	0	0	0	0	0	1	0	0	0	0	0	1	0	0	0	0	0	0	0	0	0	0	0	0	0	0	0	0	0
Bacteria;Firmicutes;Erysipelotrichia;Erysipelotrichales;Erysipelotrichaceae;Turicibacter;unknown species	OTU_1290	0	0	0	242	0	0	0	0	0	0	0	0	1	0	0	0	0	0	0	0	0	0	0	0	0	0	0	0	0	0	0	0	0	0	0	0	0	0	0	0	0	0	1	0	0	0	1	0
Bacteria;Firmicutes;Negativicutes;Selenomonadales;Veillonellaceae;Sporomusa;unknown species	OTU_947	0	0	0	0	0	0	0	0	0	0	0	0	0	0	0	0	0	0	0	0	0	0	0	0	0	0	0	371	0	0	0	0	0	0	0	0	0	0	0	0	0	0	0	0	0	0	0	0
Bacteria;Fusobacteria;Fusobacteriia;Fusobacteriales;Fusobacteriaceae;Cetobacterium;unknown species	OTU_1090	0	0	0	0	0	0	1	0	0	0	320	0	0	0	0	1	1	0	0	0	0	0	0	0	0	0	0	0	0	0	0	0	0	1	1	0	1	1	0	1	0	3	3	0	0	1	0	0
Bacteria;Fusobacteria;Fusobacteriia;Fusobacteriales;Fusobacteriaceae;Propionigenium;unknown species	OTU_709	0	0	0	0	0	0	1	0	1	0	549	0	2	1	1	0	0	0	1	0	2	0	0	0	0	1	0	0	0	0	0	0	0	0	0	0	0	0	6	7	7	2	5	0	1	5	0	0
Bacteria;Fusobacteria;Fusobacteriia;Fusobacteriales;Leptotrichiaceae;Hypnocyclicus;Hypnocyclicus thermotrophus	OTU_148	5	1	4	1	0	1	1	0	0	293	3	1	2	0	0	1	1	0	0	1	2793	1	0	1	2	1	0	0	1	0	0	0	3	1	3	0	1	2	0	2	1	9	3	1	0	2	4	13
Bacteria;Fusobacteria;Fusobacteriia;Fusobacteriales;Leptotrichiaceae;Hypnocyclicus;Hypnocyclicus thermotrophus	OTU_253	1	1	1645	236	0	1	0	0	0	2	2	1	1	0	1	2	0	1	0	0	0	1	1	1	1	0	92	0	0	0	0	0	1	0	1	0	2	0	2	0	2	0	0	0	0	2	1	3
Bacteria;Fusobacteria;Fusobacteriia;Fusobacteriales;Leptotrichiaceae;Hypnocyclicus;Hypnocyclicus thermotrophus	OTU_406	0	0	0	1	0	0	0	0	0	1	0	0	2	0	0	0	1	0	2	1	1372	1	1	0	0	0	1	0	0	0	1	0	0	0	2	0	1	0	1	2	0	16	6	0	0	0	10	14
Bacteria;Fusobacteria;Fusobacteriia;Fusobacteriales;Leptotrichiaceae;unknown genus;unknown species	OTU_997	0	0	0	370	0	0	0	1	0	0	0	0	0	0	0	0	0	0	0	1	0	0	0	0	0	0	0	0	0	0	0	0	0	0	0	0	0	0	0	1	0	1	0	0	0	2	0	2
Bacteria;Gemmatimonadetes;Gemmatimonadetes;Gemmatimonadales;Gemmatimonadaceae;unknown genus;unknown species	OTU_1030	0	0	4	0	0	1	0	0	0	0	0	0	0	0	0	1	1	0	0	0	0	0	0	0	0	0	365	0	0	0	0	0	0	0	0	0	0	0	0	0	0	0	0	0	0	1	1	1
Bacteria;Hydrogenedentes;Hydrogenedentia;Hydrogenedentiales;Hydrogenedensaceae;unknown genus;unknown species	OTU_995	0	0	1	0	0	0	0	0	0	0	0	0	0	0	0	0	0	0	0	0	0	0	433	0	0	0	0	0	0	0	0	0	1	0	0	0	0	0	0	0	0	0	1	2	1	0	0	0
Bacteria;Kiritimatiellaeota;Kiritimatiellae;Kiritimatiellales;Kiritimatiellaceae;R76-B128;unknown species	OTU_147	0	0	0	0	1	0	0	0	0	0	2	0	0	0	0	0	0	0	0	1	0	0	0	1	1	0	0	0	0	0	3180	0	0	0	2	0	0	2	1	0	1	0	2	2	1	0	0	2
Bacteria;Kiritimatiellaeota;Kiritimatiellae;Kiritimatiellales;Kiritimatiellaceae;R76-B128;unknown species	OTU_368	0	0	0	1352	0	1	0	0	0	1	0	1	0	0	0	0	0	0	0	1	0	0	0	0	0	2	0	0	0	0	2	0	79	0	0	0	0	0	0	0	0	0	0	1	4	1	2	1
Bacteria;Kiritimatiellaeota;Kiritimatiellae;Kiritimatiellales;Kiritimatiellaceae;R76-B128;unknown species	OTU_427	0	0	0	0	0	1	0	0	0	0	0	0	0	0	0	0	0	0	0	3	0	0	2	0	0	0	0	0	0	0	0	0	1	1	0	0	0	0	0	0	0	1	1	0	2	1	1	5
Bacteria;Kiritimatiellaeota;Kiritimatiellae;Kiritimatiellales;Kiritimatiellaceae;R76-B128;unknown species	OTU_867	0	0	0	0	0	0	1	0	0	0	1	0	0	0	0	0	1	0	0	0	0	0	0	0	0	485	0	0	0	0	0	0	0	0	0	0	0	0	0	1	0	0	0	0	0	0	0	0
Bacteria;Kiritimatiellaeota;Kiritimatiellae;WCHB1-41;unknown family;unknown genus;unknown species	OTU_636	0	0	0	0	0	0	0	0	719	0	0	0	0	0	0	0	0	0	1	1	0	0	0	0	0	0	0	0	0	0	1	0	0	1	0	0	0	0	0	0	0	0	0	1	1	0	1	0
Bacteria;Kiritimatiellaeota;Kiritimatiellae;WCHB1-41;unknown family;unknown genus;unknown species	OTU_1043	0	0	0	0	0	0	0	0	0	354	0	0	0	0	0	0	0	0	0	0	0	0	0	0	0	0	0	0	0	0	0	0	0	0	0	0	0	0	0	0	0	0	1	0	0	0	0	0
Bacteria;Kiritimatiellaeota;Kiritimatiellae;WCHB1-41;unknown family;unknown genus;unknown species	OTU_1087	0	0	312	0	0	0	0	0	0	0	0	0	0	0	0	0	1	0	0	0	0	1	0	0	1	0	19	0	0	0	0	0	0	0	0	0	0	0	0	2	0	0	0	0	1	1	0	1
Bacteria;Kiritimatiellaeota;Kiritimatiellae;WCHB1-41;unknown family;unknown genus;unknown species	OTU_1187	0	0	0	0	0	0	0	0	0	0	0	0	0	0	0	0	0	0	0	0	0	0	0	0	0	0	0	0	0	0	0	0	0	0	0	0	292	0	0	1	0	0	0	0	0	0	0	0
Bacteria;Latescibacteria;Latescibacteria;Latescibacterales;Latescibacteraceae;unknown genus;unknown species	OTU_354	1	0	0	0	0	1	0	0	0	0	0	0	0	0	0	0	0	0	0	1	0	0	1	0	0	0	0	0	0	0	0	0	0	0	0	0	0	0	0	0	0	0	0	0	0	1	406	699
Bacteria;Latescibacteria;Latescibacteria;Latescibacterales;Latescibacteraceae;unknown genus;unknown species	OTU_535	0	0	0	0	0	0	0	0	0	0	0	0	0	0	4	1	916	2	0	0	0	1	1	1	0	0	1	0	0	0	0	0	0	0	0	0	0	1	1	1	1	1	1	0	0	1	0	1
Bacteria;Latescibacteria;Latescibacteria;Latescibacterales;Latescibacteraceae;unknown genus;unknown species	OTU_1110	0	0	0	0	1	0	0	0	0	0	1	0	0	0	0	0	0	0	0	0	0	0	0	0	0	0	0	0	0	0	0	0	0	0	0	0	0	0	0	0	0	1	0	0	0	0	102	98
Bacteria;Latescibacteria;Latescibacteria;Latescibacterales;Latescibacteraceae;unknown genus;unknown species	OTU_1297	0	0	0	0	0	0	0	0	0	0	0	0	0	0	0	0	0	0	0	0	0	0	0	0	0	0	0	0	0	0	0	0	0	0	0	0	185	0	0	8	0	28	35	1	0	1	2	1
Bacteria;LCP-89;unknown class;unknown order;unknown family;unknown genus;unknown species	OTU_516	0	0	0	0	0	0	969	0	0	0	0	0	1	1	0	0	0	0	1	1	0	0	0	1	0	1	1	0	0	0	0	0	0	1	1	0	0	0	1	0	0	1	1	0	0	0	0	0
Bacteria;LCP-89;unknown class;unknown order;unknown family;unknown genus;unknown species	OTU_785	0	0	0	1	0	0	1	523	1	0	1	0	0	0	0	0	0	0	0	0	0	0	1	373	0	0	0	0	0	0	1	0	1	0	0	0	0	0	2	0	0	2	1	4	2	4	0	1
Bacteria;LCP-89;unknown class;unknown order;unknown family;unknown genus;unknown species	OTU_1184	0	0	0	0	0	0	0	0	0	0	0	0	0	0	0	0	0	0	0	1	0	0	284	0	0	0	0	0	0	0	0	0	0	0	0	0	0	0	0	0	0	0	0	0	1	1	1	0
Bacteria;Lentisphaerae;Lentisphaeria;Lentisphaerales;Lentisphaeraceae;Lentisphaera;unknown species	OTU_202	0	2	0	0	0	1	0	1	0	0	1	0	1	0	1	1	1	0	2	0	0	0	0	0	0	0	0	0	0	0	1	0	0	1	2	0	0	1	1	1	2	1	0	1	0	1	1	1
Bacteria;Lentisphaerae;Lentisphaeria;Lentisphaerales;Lentisphaeraceae;Lentisphaera;unknown species	OTU_1131	0	0	0	0	0	0	0	0	0	0	0	0	0	0	0	0	0	0	0	0	0	0	0	0	0	0	0	0	0	0	0	0	0	0	0	0	313	0	1	0	0	0	3	0	0	0	1	0
Bacteria;Lentisphaerae;Lentisphaeria;Victivallales;PRD18C08;unknown genus;unknown species	OTU_241	0	0	1	683	1	0	5	0	0	1	0	2	1	1	0	0	0	1	0	1380	2	0	1	0	1	1	0	0	1	0	1	0	1	0	0	0	2	0	0	0	0	1	0	1	0	2	0	0
Bacteria;Lentisphaerae;Oligosphaeria;P.palmC41;unknown family;unknown genus;unknown species	OTU_638	0	0	0	0	0	0	0	0	0	0	0	1	0	0	0	1	0	0	0	0	0	0	0	719	0	0	0	0	0	0	0	0	0	0	0	0	0	0	1	0	1	0	0	0	0	0	0	0
Bacteria;Lentisphaerae;Oligosphaeria;P.palmC41;unknown family;unknown genus;unknown species	OTU_714	0	0	0	0	0	0	0	0	0	0	0	1	0	0	0	0	0	605	0	1	0	1	0	0	0	0	0	0	0	0	0	0	0	0	0	0	1	0	1	0	1	0	0	0	0	1	0	0
Bacteria;Marinimicrobia (SAR406 clade);unknown class;unknown order;unknown family;unknown genus;marine metagenome	OTU_1367	0	0	0	1	0	0	0	0	0	0	0	0	0	0	0	0	0	0	0	1	0	0	0	0	1	0	0	0	0	0	0	0	0	0	0	0	0	0	1	0	0	0	0	0	0	0	0	1
Bacteria;Marinimicrobia (SAR406 clade);unknown class;unknown order;unknown family;unknown genus;Multi-affiliation	OTU_206	0	1	1	0	0	1	0	1	1	0	45	0	1	0	0	1	1	1	0	0	0	0	2	1	2	0	0	0	1	0	1	0	1	2	0	0	4	1	1	2	1	2	0	3	1	2	2	2
Bacteria;Marinimicrobia (SAR406 clade);unknown class;unknown order;unknown family;unknown genus;Multi-affiliation	OTU_1251	0	0	0	0	0	0	0	1	0	0	0	0	0	0	0	0	0	0	0	0	0	0	0	0	2	0	0	0	0	0	0	0	0	0	1	0	0	0	1	0	0	0	0	1	0	0	0	0
Bacteria;Marinimicrobia (SAR406 clade);unknown class;unknown order;unknown family;unknown genus;unknown species	OTU_181	1	0	1	1	0	3	2	3	0	0	4	1	2	1	1	0	2	1	0	0	1	0	0	1	0	0	2	0	1	0	1	0	0	1	4	0	2	1	0	2	0	0	0	3	3	1	2	2
Bacteria;Marinimicrobia (SAR406 clade);unknown class;unknown order;unknown family;unknown genus;unknown species	OTU_789	0	0	0	0	0	0	0	0	0	0	0	0	0	0	0	0	0	0	0	0	0	0	0	0	0	0	0	0	0	0	0	0	1	0	0	0	0	0	0	0	0	1	0	0	0	0	0	0
Bacteria;Nitrospirae;Nitrospira;Nitrospirales;Nitrospiraceae;Nitrospira;unknown species	OTU_594	0	0	0	1	0	0	0	0	0	0	0	0	0	0	0	1	0	0	0	0	0	0	0	0	0	0	0	0	0	0	0	0	0	0	2	0	0	0	1	3	5	170	159	1	1	1	191	107
Bacteria;Nitrospirae;Nitrospira;Nitrospirales;Nitrospiraceae;Nitrospira;unknown species	OTU_935	0	0	0	1	0	1	0	0	0	0	0	0	0	1	0	1	0	0	0	0	1	0	0	0	0	0	0	0	0	0	0	0	1	0	1	0	0	0	0	0	1	11	32	0	1	0	154	81
Bacteria;Nitrospirae;Thermodesulfovibrionia;Thermodesulfovibrionales;Thermodesulfovibrionaceae;Thermodesulfovibrio;unknown species	OTU_35	3	2	2	3	0	4	9	9	5	2	5	3	13	4	1	7	2	4	9	7	2	10	6	3	8	5	5	0	6	0	6	0	146	2	2	0	11	6	207	271	135	1535	826	10	6	10	4622	4238
Bacteria;Nitrospirae;Thermodesulfovibrionia;Thermodesulfovibrionales;Thermodesulfovibrionaceae;Thermodesulfovibrio;unknown species	OTU_353	1	0	1	0	0	1	0	1	0	0	0	0	2	0	1	3	3	0	2	3	1	2	1	0	2	0	0	0	0	0	1	0	0	1	0	0	3	1	131	650	110	462	66	0	1	0	2	5
Bacteria;Nitrospirae;Thermodesulfovibrionia;Thermodesulfovibrionales;Thermodesulfovibrionaceae;Thermodesulfovibrio;unknown species	OTU_480	0	0	0	1	0	1	0	1	0	0	1	0	0	0	0	0	0	0	0	0	0	1	2	0	2	2	0	0	0	0	0	0	0	1	1	0	1	0	2	3	0	929	33	0	1	0	38	33
Bacteria;Nitrospirae;Thermodesulfovibrionia;Thermodesulfovibrionales;Thermodesulfovibrionaceae;Thermodesulfovibrio;unknown species	OTU_665	1	0	0	0	0	0	0	1	0	0	1	0	0	0	0	0	0	1	0	0	0	0	0	0	0	0	0	0	0	0	0	0	0	0	0	0	1	0	9	13	8	41	7	0	0	0	188	173
Bacteria;Nitrospirae;Thermodesulfovibrionia;Thermodesulfovibrionales;Thermodesulfovibrionaceae;Thermodesulfovibrio;unknown species	OTU_1076	0	0	0	0	0	1	1	0	0	0	0	0	0	0	0	0	0	0	0	0	0	0	1	0	1	0	0	0	0	0	1	0	0	0	0	0	0	0	0	0	1	37	166	1	0	0	26	40
Bacteria;Nitrospirae;Thermodesulfovibrionia;unknown order;unknown family;unknown genus;unknown species	OTU_589	0	0	1	1	0	0	0	0	0	0	0	0	0	0	0	0	0	0	0	0	0	0	0	0	0	0	1	0	0	0	0	0	0	0	0	0	1	0	4	2	3	1	0	0	0	0	231	191
Bacteria;Patescibacteria;ABY1;Candidatus Falkowbacteria;unknown family;unknown genus;unknown species	OTU_544	1	0	1	0	0	0	0	0	0	0	0	0	0	0	0	1	0	0	0	1	0	1	958	0	0	0	0	0	0	0	0	0	1	0	0	0	0	1	0	0	1	0	0	3	2	3	0	0
Bacteria;Patescibacteria;ABY1;Candidatus Uhrbacteria;unknown family;unknown genus;Candidatus Uhrbacteria bacterium GW2011_GWC2_41_11	OTU_1295	0	0	0	0	0	0	0	0	1	0	0	0	0	0	0	0	0	0	0	0	1	1	0	0	0	0	0	0	0	0	0	0	0	0	0	0	242	0	0	1	1	0	0	0	0	0	0	0
Bacteria;Patescibacteria;Berkelbacteria;unknown order;unknown family;unknown genus;unknown species	OTU_128	1	0	1	1	0	0	0	0	0	0	1	0	1	0	1	1	1	2	1	0	1	0	1	2	3	0	0	0	0	0	1	0	2	3620	0	0	1	0	1	0	0	6	3	1	1	0	3	0
Bacteria;Patescibacteria;Gracilibacteria;Absconditabacteriales (SR1);unknown family;unknown genus;unknown species	OTU_137	2	0	0	1	0	2	0	4	0	1	1	0	1	1	0	2	1	0	3	0	2	0	2	1	3	3	1	0	2	0	0	0	0	1	2	0	0	0	2	2	1	1643	184	0	3	2	1	2
Bacteria;Patescibacteria;Gracilibacteria;Absconditabacteriales (SR1);unknown family;unknown genus;unknown species	OTU_662	0	0	0	0	1	1	0	611	0	0	53	0	0	0	0	1	0	0	0	0	0	0	0	0	1	0	0	0	0	0	0	0	0	0	1	0	1	0	0	0	0	0	1	8	11	10	0	0
Bacteria;Patescibacteria;Gracilibacteria;Absconditabacteriales (SR1);unknown family;unknown genus;unknown species	OTU_695	0	0	0	625	0	0	0	0	0	0	0	0	0	1	0	0	0	1	0	0	1	0	1	0	0	1	0	0	0	0	0	0	0	0	1	0	0	0	0	0	0	0	0	0	2	1	0	0
Bacteria;Patescibacteria;Gracilibacteria;Absconditabacteriales (SR1);unknown family;unknown genus;unknown species	OTU_953	0	0	0	396	0	0	1	1	0	0	1	0	0	0	0	0	0	0	0	0	0	0	0	1	0	0	0	0	0	0	1	0	0	0	0	0	0	0	0	0	0	0	0	0	0	3	0	0
Bacteria;Patescibacteria;Gracilibacteria;Absconditabacteriales (SR1);unknown family;unknown genus;unknown species	OTU_965	0	0	0	0	0	1	0	0	0	0	0	0	0	0	0	0	0	0	1	1	1	0	0	0	0	0	0	0	0	0	0	0	0	0	0	0	0	1	0	0	0	130	207	1	0	0	0	0
Bacteria;Patescibacteria;Gracilibacteria;JGI 0000069-P22;unknown family;unknown genus;Multi-affiliation	OTU_392	0	0	0	0	0	0	1	3	1284	1	1	0	0	1	0	0	1	0	0	1	0	1	1	0	1	2	0	0	1	0	0	0	0	0	0	0	3	0	1	0	1	3	3	2	1	2	1	1
Bacteria;Patescibacteria;Gracilibacteria;JGI 0000069-P22;unknown family;unknown genus;unknown species	OTU_173	0	0	1	1	1	1	2	3	2	0	1	0	0	0	0	1	2	0	1	0	0	3	1	1	0	2449	0	0	1	0	1	0	165	1	0	0	0	0	0	1	0	3	15	5	3	2	0	0
Bacteria;Patescibacteria;Gracilibacteria;JGI 0000069-P22;unknown family;unknown genus;unknown species	OTU_409	0	1	0	1	0	0	0	938	0	1	0	0	1	0	0	0	0	2	0	1	0	3	0	0	1	2	0	0	1	0	0	0	0	1	0	0	0	0	1	0	0	0	0	66	68	86	0	0
Bacteria;Patescibacteria;Gracilibacteria;JGI 0000069-P22;unknown family;unknown genus;unknown species	OTU_614	1	1	0	0	0	0	0	728	2	1	0	0	0	0	2	0	0	0	0	0	0	0	0	1	0	1	0	0	0	0	0	0	0	0	0	0	0	0	0	0	0	0	0	0	1	3	0	0
Bacteria;Patescibacteria;Gracilibacteria;unknown order;unknown family;unknown genus;unknown species	OTU_282	0	0	0	0	0	0	1	0	0	0	0	1	1	0	1	0	0	0	0	0	0	1856	0	0	1	0	0	0	0	0	0	0	0	0	0	0	0	0	0	0	0	0	0	0	0	0	0	0
Bacteria;Patescibacteria;Gracilibacteria;unknown order;unknown family;unknown genus;unknown species	OTU_288	0	0	0	1	0	0	0	0	0	1808	0	0	0	0	0	0	0	0	0	0	0	0	0	0	0	0	1	0	1	0	0	0	1	0	2	0	2	0	1	0	1	1	1	6	3	2	0	1
Bacteria;Patescibacteria;Gracilibacteria;unknown order;unknown family;unknown genus;unknown species	OTU_435	0	0	274	0	0	1	0	1	0	1	0	1	0	0	0	0	0	0	1	1	0	0	0	1	0	922	16	0	0	0	1	0	1	0	1	0	0	0	1	0	0	2	0	0	0	2	1	0
Bacteria;Patescibacteria;Microgenomatia;Candidatus Pacebacteria;unknown family;unknown genus;Multi-affiliation	OTU_1191	0	0	0	0	0	1	0	0	0	0	0	0	0	0	0	0	0	0	0	0	0	0	0	1	277	0	0	0	0	0	0	0	0	0	0	0	0	0	0	0	0	0	0	0	0	2	1	0
Bacteria;Patescibacteria;Microgenomatia;Candidatus Woesebacteria;unknown family;unknown genus;unknown species	OTU_507	0	0	0	0	0	1331	0	0	0	2	0	0	0	0	1	0	0	0	0	1	0	0	1	0	1	0	0	0	1	0	0	0	0	0	0	0	0	2	0	0	0	0	0	0	1	0	0	0
Bacteria;Patescibacteria;Parcubacteria;Candidatus Adlerbacteria;unknown family;unknown genus;unknown species	OTU_690	0	0	0	0	649	0	0	0	0	0	0	0	0	0	0	0	0	0	0	1	0	0	0	0	0	0	0	0	0	0	0	0	0	1	0	0	0	0	2	0	0	0	0	0	0	0	0	0
Bacteria;Patescibacteria;Parcubacteria;Candidatus Jorgensenbacteria;unknown family;unknown genus;Parcubacteria group bacterium GW2011_GWA2_47_9	OTU_411	1364	0	0	0	0	0	0	0	0	0	0	0	1	0	0	0	0	0	0	0	0	0	0	0	0	0	0	0	0	0	1	0	0	0	1	0	0	0	0	0	0	0	0	0	0	0	1	1
Bacteria;Patescibacteria;Parcubacteria;Candidatus Kaiserbacteria;unknown family;unknown genus;bacterium SH4-10	OTU_912	0	0	0	0	0	0	0	0	0	0	1	0	0	0	0	0	0	0	0	0	0	0	0	0	0	0	0	0	0	0	0	0	0	0	0	0	0	0	23	10	14	48	51	71	66	59	19	14
Bacteria;Patescibacteria;Parcubacteria;Candidatus Kaiserbacteria;unknown family;unknown genus;marine metagenome	OTU_1148	0	0	0	0	0	0	0	0	0	0	0	0	0	0	0	0	0	0	0	0	0	0	1	0	0	0	0	0	0	0	0	0	0	0	0	0	0	0	0	1	0	1	1	119	153	129	2	4
Bacteria;Patescibacteria;Parcubacteria;Candidatus Kaiserbacteria;unknown family;unknown genus;unknown species	OTU_1051	1	1	0	0	0	0	0	0	0	0	224	0	0	0	0	0	2	0	0	0	0	1	0	1	0	0	0	0	0	0	0	0	0	0	0	0	0	0	0	0	0	0	0	35	38	50	2	1
Bacteria;Patescibacteria;Parcubacteria;Candidatus Nomurabacteria;unknown family;unknown genus;Candidatus Nomurabacteria bacterium GW2011_GWD1_44_10	OTU_746	0	595	0	0	0	1	0	0	0	0	0	1	0	0	0	1	0	0	0	1	0	0	0	0	1	0	0	0	0	0	0	0	0	0	0	0	0	2	1	0	0	2	1	0	0	0	0	0
Bacteria;Patescibacteria;Parcubacteria;Candidatus Nomurabacteria;unknown family;unknown genus;unknown species	OTU_491	0	0	1	0	0	0	0	0	0	0	0	0	1	0	0	0	1	0	0	0	0	0	0	0	0	0	0	0	1	0	0	0	0	0	0	0	0	1088	0	0	0	0	0	0	0	0	0	0
Bacteria;Patescibacteria;Parcubacteria;Candidatus Wolfebacteria;unknown family;unknown genus;Candidatus Wolfebacteria bacterium RIFCSPHIGHO2_01_FULL_48_22	OTU_1231	0	0	0	0	0	0	0	1	1	0	0	0	0	0	0	0	0	0	0	0	0	0	0	0	0	0	0	0	0	0	0	0	0	0	0	0	0	0	0	0	0	68	173	0	0	0	7	4
Bacteria;Patescibacteria;Saccharimonadia;Saccharimonadales;Saccharimonadaceae;unknown genus;unknown species	OTU_522	0	0	0	0	0	0	0	0	0	0	0	0	0	0	0	0	0	0	0	0	0	0	0	0	0	0	0	0	0	0	0	0	0	0	0	867	0	0	0	0	0	0	0	0	0	0	0	0
Bacteria;Patescibacteria;Saccharimonadia;Saccharimonadales;Saccharimonadaceae;unknown genus;unknown species	OTU_826	0	0	0	0	0	0	0	0	0	0	0	0	0	0	0	0	0	0	0	0	0	0	0	0	0	0	0	1	0	0	0	349	0	0	0	145	0	0	0	0	0	0	0	0	0	0	0	0
Bacteria;Patescibacteria;Saccharimonadia;Saccharimonadales;Saccharimonadaceae;unknown genus;unknown species	OTU_882	0	0	0	0	0	0	0	0	0	0	0	0	0	0	0	0	0	0	0	0	0	0	0	0	0	0	0	0	0	0	0	212	0	0	0	205	0	0	0	0	0	0	0	0	0	0	0	0
Bacteria;Patescibacteria;WWE3;unknown order;unknown family;unknown genus;unknown species	OTU_920	0	1	0	1	0	0	0	2	0	0	0	0	0	0	0	0	0	0	0	0	0	0	0	1	0	1	0	0	0	0	0	0	0	0	0	0	0	1	2	0	0	1	1	0	0	0	5	17
Bacteria;Planctomycetes;Brocadiae;Brocadiales;Scalinduaceae;Candidatus Scalindua;unknown species	OTU_352	0	0	0	0	0	0	0	0	0	0	0	0	0	0	0	2	0	0	2	0	0	0	0	0	0	0	0	0	1557	0	0	0	1	0	0	0	0	0	0	0	0	0	1	0	0	0	0	0
Bacteria;Planctomycetes;OM190;unknown order;unknown family;unknown genus;unknown species	OTU_601	0	0	1	0	0	0	0	0	0	0	0	0	1	0	0	0	1	0	0	0	1	2	0	0	0	782	0	0	0	0	0	0	0	1	0	0	0	0	0	0	0	0	0	1	0	0	0	1
Bacteria;Planctomycetes;OM190;unknown order;unknown family;unknown genus;unknown species	OTU_928	0	0	0	0	0	0	0	0	0	0	0	0	0	0	0	0	0	0	1	0	0	0	0	0	0	0	0	0	0	0	0	0	0	0	0	0	208	0	4	1	2	7	5	1	2	1	49	91
Bacteria;Planctomycetes;OM190;unknown order;unknown family;unknown genus;unknown species	OTU_1064	0	0	0	0	0	0	0	0	0	0	0	0	0	0	0	0	0	0	0	0	0	0	0	0	0	0	1	0	0	0	0	0	0	0	0	0	0	0	0	0	0	0	0	0	1	1	85	137
Bacteria;Planctomycetes;OM190;unknown order;unknown family;unknown genus;unknown species	OTU_1175	0	0	0	0	0	0	0	240	0	0	0	0	0	0	0	0	0	0	0	0	0	0	0	0	0	0	0	0	0	0	0	0	0	0	0	0	0	0	9	2	3	0	0	7	5	6	1	3
Bacteria;Planctomycetes;OM190;unknown order;unknown family;unknown genus;unknown species	OTU_1369	0	0	0	0	0	0	0	0	1	0	0	0	0	0	0	0	0	0	0	0	0	0	0	0	0	0	0	0	0	0	0	0	0	0	0	0	0	0	14	6	6	12	10	12	25	9	89	62
Bacteria;Planctomycetes;Phycisphaerae;Phycisphaerales;Phycisphaeraceae;AKYG587;unknown species	OTU_1189	0	0	0	0	0	0	0	0	0	0	0	0	0	0	0	0	0	0	0	0	0	0	0	0	0	0	0	0	0	0	0	0	0	0	0	0	0	0	22	8	9	17	23	0	0	0	80	53
Bacteria;Planctomycetes;Phycisphaerae;Phycisphaerales;Phycisphaeraceae;CL500-3;unknown species	OTU_1014	0	0	0	0	0	0	0	0	0	0	152	0	0	0	0	0	0	0	1	0	0	0	0	40	0	1	0	0	1	0	1	0	0	0	0	0	0	0	0	1	0	0	1	0	2	3	0	1
Bacteria;Planctomycetes;Phycisphaerae;Phycisphaerales;Phycisphaeraceae;CL500-3;unknown species	OTU_1168	0	0	0	0	0	0	0	0	0	0	247	0	0	0	0	0	0	0	0	0	0	0	0	0	0	0	0	0	0	0	0	0	0	0	0	0	0	0	1	0	0	0	0	0	0	0	0	0
Bacteria;Planctomycetes;Phycisphaerae;Phycisphaerales;Phycisphaeraceae;unknown genus;unknown species	OTU_876	0	0	0	0	0	0	0	0	0	0	0	0	0	0	0	0	0	0	0	0	0	0	0	449	0	0	0	0	0	0	0	0	0	0	0	0	1	0	0	0	0	0	0	1	5	1	0	0
Bacteria;Planctomycetes;Phycisphaerae;Phycisphaerales;Phycisphaeraceae;Urania-1B-19 marine sediment group;unknown species	OTU_1045	0	0	0	0	0	0	0	0	0	0	340	0	0	0	0	0	0	0	0	1	0	0	0	0	0	0	0	0	0	0	0	0	0	1	0	0	0	0	0	0	0	0	0	0	0	0	0	0
Bacteria;Planctomycetes;Phycisphaerae;Phycisphaerales;Phycisphaeraceae;Urania-1B-19 marine sediment group;unknown species	OTU_1078	0	0	0	0	0	0	0	0	0	0	0	0	0	0	0	0	0	0	0	0	0	0	0	0	0	0	0	0	0	0	0	0	0	0	0	0	0	0	2	0	1	1	0	1	1	1	0	4
Bacteria;Planctomycetes;Phycisphaerae;Tepidisphaerales;WD2101 soil group;unknown genus;unknown species	OTU_280	0	0	15	0	1	1	0	0	0	0	0	0	1	0	0	0	0	0	0	0	1	0	2	1	0	0	1768	0	0	0	0	0	0	1	1	0	0	1	1	0	1	2	1	0	0	0	0	1
Bacteria;Planctomycetes;Pla3 lineage;unknown order;unknown family;unknown genus;unknown species	OTU_1166	0	0	0	0	0	0	0	0	0	0	0	0	0	0	0	0	0	0	0	1	0	0	0	0	1	0	0	0	0	0	0	0	0	0	0	0	0	0	0	0	0	0	1	0	2	0	1	3
Bacteria;Planctomycetes;Pla4 lineage;unknown order;unknown family;unknown genus;unknown species	OTU_1023	1	0	0	0	0	1	0	1	350	0	0	0	0	0	0	1	0	1	0	0	0	0	0	0	0	1	0	0	0	0	0	0	0	0	0	0	0	0	0	1	0	0	0	0	0	1	0	0
Bacteria;Planctomycetes;Planctomycetacia;Pirellulales;Pirellulaceae;Blastopirellula;unknown species	OTU_534	0	0	0	0	0	0	0	2	1	0	1	0	0	0	1	1	0	0	0	0	0	0	1	0	1	0	0	0	0	0	0	0	0	0	0	0	0	901	0	0	2	1	0	0	0	1	0	0
Bacteria;Planctomycetes;Planctomycetacia;Pirellulales;Pirellulaceae;Blastopirellula;unknown species	OTU_568	0	0	0	1	0	0	0	195	66	0	97	0	0	0	0	3	0	1	0	1	0	2	2	0	0	1	0	0	0	0	2	0	0	0	0	0	0	2	4	0	4	0	0	5	8	3	1	2
Bacteria;Planctomycetes;Planctomycetacia;Pirellulales;Pirellulaceae;Blastopirellula;unknown species	OTU_794	0	0	0	0	1	0	0	0	0	0	0	0	0	1	0	0	0	0	0	0	0	0	486	0	0	0	0	0	0	0	0	0	0	1	1	0	0	0	2	0	5	1	1	2	1	0	0	7
Bacteria;Planctomycetes;Planctomycetacia;Pirellulales;Pirellulaceae;Blastopirellula;unknown species	OTU_828	0	0	0	0	0	0	1	0	0	0	0	0	0	0	0	0	0	0	0	0	0	0	475	0	0	0	0	0	0	0	0	0	0	0	0	0	0	0	2	1	1	0	0	1	2	0	1	2
Bacteria;Planctomycetes;Planctomycetacia;Pirellulales;Pirellulaceae;Blastopirellula;unknown species	OTU_1011	0	0	0	0	0	0	1	0	0	0	0	0	0	0	0	360	0	0	0	0	1	0	0	0	0	0	0	0	0	0	0	0	0	0	0	0	0	0	0	0	2	0	2	0	1	1	0	1
Bacteria;Planctomycetes;Planctomycetacia;Pirellulales;Pirellulaceae;Blastopirellula;unknown species	OTU_1092	0	0	0	0	0	0	0	0	0	1	0	0	0	0	0	1	0	0	0	0	0	0	311	0	0	0	0	0	0	0	0	0	0	0	0	0	0	0	0	0	0	0	0	0	1	0	0	0
Bacteria;Planctomycetes;Planctomycetacia;Pirellulales;Pirellulaceae;Blastopirellula;unknown species	OTU_1230	0	0	0	0	0	0	0	0	0	0	0	0	0	0	0	271	0	0	0	0	0	0	1	0	0	0	0	0	0	0	0	0	0	0	0	0	0	0	0	0	0	0	0	0	0	1	0	0
Bacteria;Planctomycetes;Planctomycetacia;Pirellulales;Pirellulaceae;Blastopirellula;unknown species	OTU_1255	0	0	0	0	0	0	0	0	0	0	0	0	0	0	0	0	0	0	0	0	0	0	238	0	0	0	0	0	0	0	0	0	0	0	0	0	0	0	0	3	4	1	0	0	0	0	0	0
Bacteria;Planctomycetes;Planctomycetacia;Pirellulales;Pirellulaceae;Multi-affiliation;Multi-affiliation	OTU_380	1	0	0	0	0	1423	0	1	0	0	0	0	0	0	0	0	0	0	0	1	0	0	0	0	0	0	0	0	0	0	0	0	0	0	0	0	0	1	0	0	1	1	0	1	5	3	0	1
Bacteria;Planctomycetes;Planctomycetacia;Pirellulales;Pirellulaceae;Pir4 lineage;unknown species	OTU_728	1	0	0	0	0	0	0	0	0	0	0	0	0	0	0	0	0	1	0	0	0	0	650	0	0	0	0	0	0	0	0	0	0	0	0	0	0	0	0	0	0	0	0	0	0	0	0	0
Bacteria;Planctomycetes;Planctomycetacia;Pirellulales;Pirellulaceae;Pir4 lineage;unknown species	OTU_779	0	0	0	0	0	0	0	0	0	0	0	0	0	0	0	0	0	0	0	0	0	0	555	0	0	0	0	0	0	0	0	0	0	0	0	0	0	1	0	0	0	1	0	0	0	0	0	0
Bacteria;Planctomycetes;Planctomycetacia;Pirellulales;Pirellulaceae;Pir4 lineage;unknown species	OTU_842	0	0	0	0	0	1	0	0	0	0	0	0	0	0	0	0	0	0	0	0	0	0	556	0	0	1	0	0	1	0	0	0	0	0	0	0	0	0	0	1	0	0	0	0	0	0	0	0
Bacteria;Planctomycetes;Planctomycetacia;Pirellulales;Pirellulaceae;Pir4 lineage;unknown species	OTU_1032	0	0	0	1	0	0	0	0	0	0	1	0	0	0	0	0	0	0	0	0	0	0	0	0	0	0	0	0	0	0	0	0	0	0	0	0	350	0	0	1	0	0	0	0	0	0	0	0
Bacteria;Planctomycetes;Planctomycetacia;Pirellulales;Pirellulaceae;Pir4 lineage;unknown species	OTU_1084	0	0	0	0	0	0	0	0	0	0	0	0	314	0	1	0	1	0	0	0	1	0	0	0	0	0	0	0	0	0	0	0	0	0	0	0	0	0	0	1	0	0	0	2	5	1	0	0
Bacteria;Planctomycetes;Planctomycetacia;Pirellulales;Pirellulaceae;Pir4 lineage;unknown species	OTU_1183	0	0	0	1	0	0	0	1	0	0	0	0	193	0	0	0	0	0	0	0	0	0	0	0	0	0	0	0	0	0	0	0	0	0	0	0	0	0	4	2	2	0	0	18	34	20	0	0
Bacteria;Planctomycetes;Planctomycetacia;Pirellulales;Pirellulaceae;Pir4 lineage;unknown species	OTU_1293	0	0	0	0	0	1	0	0	0	0	0	0	0	0	0	0	0	0	248	0	0	0	0	0	0	0	0	0	0	0	0	0	0	0	0	0	0	0	1	0	2	0	0	0	0	0	0	0
Bacteria;Planctomycetes;Planctomycetacia;Pirellulales;Pirellulaceae;Pirellula;unknown species	OTU_1001	0	1	0	0	0	0	0	0	0	0	0	0	0	0	0	0	0	0	0	0	0	1	380	0	0	0	0	0	0	0	0	0	0	1	0	0	0	0	0	0	0	0	0	0	0	0	0	0
Bacteria;Planctomycetes;Planctomycetacia;Pirellulales;Pirellulaceae;Pirellula;unknown species	OTU_1067	0	0	0	0	0	0	0	339	0	0	0	0	0	0	0	0	0	0	0	0	0	1	0	0	0	0	0	0	0	0	0	0	0	0	0	0	0	0	0	0	0	0	0	0	1	0	0	0
Bacteria;Planctomycetes;Planctomycetacia;Pirellulales;Pirellulaceae;Rhodopirellula;unknown species	OTU_1055	0	0	0	0	0	0	0	0	0	0	167	0	0	0	0	0	0	0	0	0	0	0	0	1	0	0	0	0	0	0	1	0	0	0	0	0	156	0	2	2	0	0	0	0	0	1	5	1
Bacteria;Planctomycetes;Planctomycetacia;Pirellulales;Pirellulaceae;Rubripirellula;unknown species	OTU_307	0	0	0	0	1	0	1	2	0	1	2	0	0	686	0	1	0	0	0	1	0	0	2	1	0	0	0	0	2	0	0	0	0	1	0	0	0	2	1	1	0	1	2	5	5	5	1	0
Bacteria;Planctomycetes;Planctomycetacia;Pirellulales;Pirellulaceae;Thermostilla;Thermostilla marina	OTU_656	0	0	1	0	0	1	1	0	0	0	0	0	0	0	0	0	0	0	1	0	0	0	0	0	0	0	1	0	1	0	0	0	104	1	0	0	299	0	1	4	0	19	23	0	0	0	75	109
Bacteria;Planctomycetes;Planctomycetacia;Pirellulales;Pirellulaceae;unknown genus;unknown species	OTU_273	0	0	0	1	0	1	659	2	0	0	0	3	252	0	69	1	0	1	0	0	1	1	0	0	457	1	0	0	1	0	0	0	0	1	0	0	4	1	8	4	1	0	2	1	3	0	3	1
Bacteria;Planctomycetes;Planctomycetacia;Pirellulales;Pirellulaceae;unknown genus;unknown species	OTU_1037	0	0	0	0	0	0	343	1	0	0	0	0	0	0	0	0	0	0	0	0	0	0	1	0	1	0	0	0	1	0	1	0	0	0	0	0	0	0	1	0	0	2	0	1	0	0	1	1
Bacteria;Planctomycetes;Planctomycetacia;Pirellulales;Pirellulaceae;unknown genus;unknown species	OTU_1062	0	0	0	0	0	0	0	0	0	0	318	0	1	0	0	1	0	0	0	0	0	0	0	0	0	0	0	0	1	0	0	0	0	0	0	0	1	1	1	1	0	2	3	0	0	0	1	0
Bacteria;Planctomycetes;Planctomycetacia;Pirellulales;Pirellulaceae;unknown genus;unknown species	OTU_1119	0	0	0	0	0	0	0	182	0	0	0	0	0	0	0	0	0	0	0	0	0	0	0	0	1	0	0	0	0	0	0	0	0	0	0	0	0	0	42	36	32	4	6	2	9	2	3	8
Bacteria;Planctomycetes;Planctomycetacia;Planctomycetales;Rubinisphaeraceae;Planctomicrobium;unknown species	OTU_983	0	0	0	1	0	0	0	365	1	0	0	0	0	0	1	0	1	0	0	0	0	0	0	0	2	0	0	0	0	0	0	0	0	0	0	0	0	0	2	2	1	0	1	0	0	0	0	0
Bacteria;Planctomycetes;vadinHA49;unknown order;unknown family;unknown genus;unknown species	OTU_1221	0	0	0	1	272	0	0	0	0	0	0	0	0	0	0	0	0	0	0	0	0	0	0	0	0	0	0	0	0	0	0	0	0	0	0	0	0	0	0	0	0	0	1	0	0	0	1	1
Bacteria;Poribacteria;unknown class;unknown order;unknown family;unknown genus;Candidatus Poribacteria bacterium WGA-4C	OTU_1068	0	0	0	1	0	0	0	0	1	0	0	0	0	0	0	0	1	0	1	0	0	0	0	1	0	0	0	0	0	0	0	0	0	0	0	0	0	0	1	3	1	2	4	0	0	0	114	124
Bacteria;Proteobacteria;Alphaproteobacteria;Acetobacterales;Acetobacteraceae;Craurococcus;unknown species	OTU_1220	1	0	0	0	0	0	0	0	0	0	0	0	0	0	0	0	0	264	0	0	0	0	0	0	0	0	0	0	0	0	0	0	0	0	0	0	0	0	0	0	1	0	0	0	0	0	0	0
Bacteria;Proteobacteria;Alphaproteobacteria;Azospirillales;Azospirillaceae;Skermanella;unknown species	OTU_719	0	0	0	0	0	0	0	1	0	1	0	1	0	0	0	0	0	0	0	0	0	0	0	1	0	0	0	0	0	0	0	0	0	0	1	0	1	0	7	0	1	0	0	0	1	0	1	0
Bacteria;Proteobacteria;Alphaproteobacteria;Caulobacterales;Caulobacteraceae;Brevundimonas;Multi-affiliation	OTU_114	1	1	3	0	749	5	1	1	0	1	4	3	3	0	0	4	1	0	4	2	2	402	6	2	6	1	4	0	1488	0	2	0	2	2	2	0	2	2	4	1	3	5	0	1	4	4	5	2
Bacteria;Proteobacteria;Alphaproteobacteria;Caulobacterales;Caulobacteraceae;Brevundimonas;Multi-affiliation	OTU_521	298	2	0	1	352	0	0	46	0	0	81	1	1	0	1	1	0	0	0	0	1	0	197	1	1	0	0	0	0	0	0	0	0	1	0	1	2	1	0	0	0	0	0	0	0	1	0	0
Bacteria;Proteobacteria;Alphaproteobacteria;Caulobacterales;Caulobacteraceae;Brevundimonas;Multi-affiliation	OTU_1069	0	0	0	0	0	0	0	0	0	0	0	0	1	0	0	0	0	0	1	0	0	1	0	0	0	0	0	0	0	0	1	0	0	0	0	0	0	1	0	0	0	0	0	0	0	0	1	0
Bacteria;Proteobacteria;Alphaproteobacteria;Caulobacterales;Caulobacteraceae;Brevundimonas;unknown species	OTU_576	0	0	0	1	1	0	0	0	0	1	0	0	0	0	0	1	1	0	0	1	1	0	0	1	0	0	0	0	0	0	0	0	0	0	1	0	0	0	0	1	0	2	0	0	1	0	0	0
Bacteria;Proteobacteria;Alphaproteobacteria;Caulobacterales;Caulobacteraceae;Caulobacter;Multi-affiliation	OTU_1177	0	0	0	0	0	1	0	1	0	0	1	0	1	277	0	0	0	0	0	0	0	0	0	0	0	0	0	0	1	0	0	0	0	0	0	0	0	0	0	0	0	0	0	1	0	0	0	0
Bacteria;Proteobacteria;Alphaproteobacteria;Caulobacterales;Hyphomonadaceae;Maricaulis;Multi-affiliation	OTU_440	1	0	0	0	0	1186	0	0	0	0	0	1	0	0	0	0	0	0	0	0	1	0	0	0	0	1	0	0	0	0	0	0	0	0	1	0	0	1	0	0	0	1	3	1	4	1	0	0
Bacteria;Proteobacteria;Alphaproteobacteria;Caulobacterales;Hyphomonadaceae;unknown genus;unknown species	OTU_1256	0	0	0	0	0	0	0	0	0	0	0	0	0	0	0	1	0	0	0	0	0	0	2	0	0	0	0	0	0	0	1	0	0	0	0	0	89	1	12	7	26	17	16	10	13	8	21	5
Bacteria;Proteobacteria;Alphaproteobacteria;Holosporales;Holosporaceae;Candidatus Gortzia;Candidatus Gortzia shahrazadis	OTU_289	1	0	0	2	0	0	0	0	0	1	0	1753	2	0	0	0	1	0	0	1	0	1	0	0	1	0	0	0	0	0	1	0	2	0	0	0	0	1	0	0	0	2	1	1	3	0	0	2
Bacteria;Proteobacteria;Alphaproteobacteria;Micavibrionales;unknown family;unknown genus;unknown species	OTU_807	0	0	0	1	0	0	0	1	0	0	0	0	0	0	0	0	0	0	0	0	0	0	2	0	1	0	0	0	1	0	0	0	0	1	0	0	0	0	0	0	0	1	1	1	0	0	0	2
Bacteria;Proteobacteria;Alphaproteobacteria;Micropepsales;Micropepsaceae;unknown genus;unknown species	OTU_846	1	0	0	0	0	1	0	0	0	0	0	1	0	0	0	0	0	0	0	0	483	0	0	0	0	0	0	0	0	0	0	0	0	0	1	0	1	1	1	0	0	0	0	0	0	0	0	0
Bacteria;Proteobacteria;Alphaproteobacteria;Parvibaculales;OCS116 clade;unknown genus;unknown species	OTU_588	0	0	0	1	0	0	0	0	0	0	0	1	0	0	0	0	0	0	1	0	0	0	2	0	0	0	0	0	0	0	0	0	0	0	1	0	0	0	0	0	0	1	1	1	1	2	1	0
Bacteria;Proteobacteria;Alphaproteobacteria;Parvibaculales;PS1 clade;unknown genus;Multi-affiliation	OTU_936	0	0	0	0	0	0	0	0	1	0	0	0	1	0	0	0	0	0	1	0	1	1	0	0	0	0	0	0	0	0	0	0	0	0	0	0	0	0	0	0	1	1	0	0	0	0	0	0
Bacteria;Proteobacteria;Alphaproteobacteria;Parvibaculales;PS1 clade;unknown genus;unknown species	OTU_717	0	0	0	0	0	0	1	0	0	0	0	0	1	0	0	0	1	0	0	0	0	0	0	0	1	0	0	0	0	0	0	0	0	1	0	0	1	0	0	0	0	0	0	0	0	0	0	0
Bacteria;Proteobacteria;Alphaproteobacteria;Puniceispirillales;SAR116 clade;unknown genus;Multi-affiliation	OTU_98	2	0	5	3	1	4	4	2	1	4	2	2	6	0	0	0	2	5	6	0	2	1	5	1	6	6	1	0	1	0	6	0	3	0	3	0	1	2	2	5	2	3	3	2	0	2	2	4
Bacteria;Proteobacteria;Alphaproteobacteria;Puniceispirillales;SAR116 clade;unknown genus;Multi-affiliation	OTU_234	1	1	1	0	0	1	3	0	1	2	1	0	0	1	0	2	0	0	1	2	1	0	1	0	3	0	1	0	0	0	0	0	0	1	0	0	2	0	2	3	0	0	1	1	1	0	2	4
Bacteria;Proteobacteria;Alphaproteobacteria;Puniceispirillales;SAR116 clade;unknown genus;Multi-affiliation	OTU_505	0	0	0	0	0	0	1	0	0	0	0	1	0	0	0	0	0	0	0	1	0	0	0	0	0	1	0	0	0	0	0	0	0	1	1	0	0	1	1	1	0	0	1	0	0	0	0	0
Bacteria;Proteobacteria;Alphaproteobacteria;Puniceispirillales;SAR116 clade;unknown genus;unknown species	OTU_91	2	0	0	2	0	2	3	2	2	7	2	773	2	2	2	6	1	0	5	3	5	2	4	2	8	0	3	0	0	0	4	0	3	2	1	0	3	526	3	5	4	12	4	5	3	5	5	7
Bacteria;Proteobacteria;Alphaproteobacteria;Puniceispirillales;SAR116 clade;unknown genus;unknown species	OTU_112	1	2	1	1	0	0	0	3	0	1	2	0	2	0	0	1	0	0	3	5	3	3	1	1	2	1	2	0	0	0	5	0	1	1	1	0	3	3	6	1	2	2	3	4	6	0	3	1
Bacteria;Proteobacteria;Alphaproteobacteria;Puniceispirillales;SAR116 clade;unknown genus;unknown species	OTU_927	0	1	0	0	0	0	0	0	0	0	0	0	0	0	0	0	0	0	1	1	0	1	0	0	0	0	0	0	0	0	0	0	0	0	0	0	0	0	0	0	1	0	0	0	0	1	0	0
Bacteria;Proteobacteria;Alphaproteobacteria;Puniceispirillales;SAR116 clade;unknown genus;unknown species	OTU_1013	0	0	0	0	0	1	0	0	0	0	0	0	0	0	0	0	0	0	0	0	0	1	0	0	0	0	0	0	0	0	0	0	0	0	0	0	0	0	0	0	0	0	0	0	0	0	1	0
Bacteria;Proteobacteria;Alphaproteobacteria;Puniceispirillales;unknown family;unknown genus;unknown species	OTU_1145	1	0	0	1	0	0	0	0	0	0	0	0	0	0	0	0	0	0	0	0	1	0	0	0	0	0	0	0	0	0	0	0	2	0	0	0	1	1	0	1	1	0	1	1	0	0	0	0
Bacteria;Proteobacteria;Alphaproteobacteria;Rhizobiales;Beijerinckiaceae;Methylobacterium;Multi-affiliation	OTU_657	1	0	1	0	0	0	0	1	0	1	0	3	0	1	0	0	0	0	1	0	0	0	0	0	0	674	0	0	0	1	1	0	0	1	0	0	0	1	0	0	0	0	0	0	0	0	1	0
Bacteria;Proteobacteria;Alphaproteobacteria;Rhizobiales;Devosiaceae;Pelagibacterium;unknown species	OTU_704	0	0	0	0	0	1	0	0	0	0	0	1	0	0	1	0	0	0	0	0	0	0	0	0	1	1	0	0	0	0	0	0	0	0	1	0	0	617	0	0	0	0	0	0	1	0	0	0
Bacteria;Proteobacteria;Alphaproteobacteria;Rhizobiales;Hyphomicrobiaceae;Filomicrobium;unknown species	OTU_661	0	0	0	151	0	0	1	0	1	2	0	0	2	0	0	0	0	0	0	1	2	0	488	0	0	0	0	0	0	0	1	0	0	0	2	0	0	0	3	5	3	1	1	0	1	2	0	5
Bacteria;Proteobacteria;Alphaproteobacteria;Rhizobiales;Hyphomicrobiaceae;Filomicrobium;unknown species	OTU_1298	0	0	0	0	0	0	1	0	0	0	1	0	0	0	0	213	0	0	0	1	0	0	0	0	0	0	0	0	0	0	0	0	1	0	0	0	0	0	4	7	10	0	2	0	1	1	5	2
Bacteria;Proteobacteria;Alphaproteobacteria;Rhizobiales;Hyphomicrobiaceae;Filomicrobium;unknown species	OTU_1536	0	0	0	0	0	0	0	0	0	0	0	0	0	0	0	0	0	0	0	0	0	0	0	0	0	0	0	0	0	0	0	0	0	0	1	0	0	0	47	42	64	19	25	7	5	8	25	18
Bacteria;Proteobacteria;Alphaproteobacteria;Rhizobiales;Hyphomicrobiaceae;Hyphomicrobium;unknown species	OTU_564	1	0	0	0	1	0	0	0	1	0	2	0	0	0	0	1	1	0	0	1	0	1	0	0	2	0	1	0	0	0	0	0	2	0	1	0	0	1	11	1	0	0	0	0	1	1	0	2
Bacteria;Proteobacteria;Alphaproteobacteria;Rhizobiales;Hyphomicrobiaceae;Pedomicrobium;Multi-affiliation	OTU_993	0	0	1	0	0	0	0	0	0	0	0	0	0	362	0	0	1	0	0	0	1	0	0	1	0	0	0	0	0	0	0	0	1	0	0	0	1	0	0	1	0	0	1	0	0	0	0	0
Bacteria;Proteobacteria;Alphaproteobacteria;Rhizobiales;Hyphomicrobiaceae;Pedomicrobium;Pedomicrobium ferrugineum	OTU_523	934	0	0	0	0	0	1	1	0	0	0	0	0	0	0	1	0	0	1	0	1	0	0	0	0	0	0	0	1	0	1	0	0	0	0	0	1	2	0	0	0	0	0	0	0	1	0	1
Bacteria;Proteobacteria;Alphaproteobacteria;Rhizobiales;Methyloligellaceae;unknown genus;unknown species	OTU_1044	0	1	0	0	0	1	0	0	0	0	0	0	0	0	0	0	0	0	0	0	0	0	340	1	0	0	0	0	0	0	0	0	0	1	0	0	0	0	0	1	0	1	1	0	1	1	0	2
Bacteria;Proteobacteria;Alphaproteobacteria;Rhizobiales;Rhizobiaceae;Mesorhizobium;Multi-affiliation	OTU_595	1	0	0	1	0	0	0	0	1	0	0	0	0	0	0	761	0	0	0	0	0	0	1	1	0	0	0	0	0	0	0	0	3	0	0	0	0	0	0	2	0	1	0	1	0	0	0	0
Bacteria;Proteobacteria;Alphaproteobacteria;Rhizobiales;Rhizobiaceae;Multi-affiliation;Multi-affiliation	OTU_119	3	3	2	3	1	1	1	1	2	1	3	1	2	0	0	2	2	3	3	2	1	1	3	1	11	1	0	0	1	0	5	0	6	4	2	0	0	2	70	3	2	6	2	2	5	0	2	1
Bacteria;Proteobacteria;Alphaproteobacteria;Rhizobiales;Rhizobiaceae;Multi-affiliation;Multi-affiliation	OTU_1111	0	0	0	0	0	0	0	0	0	0	0	0	0	0	0	0	0	0	0	0	0	0	0	0	0	0	0	0	0	0	0	0	0	0	0	287	0	0	0	0	0	0	0	0	0	0	0	0
Bacteria;Proteobacteria;Alphaproteobacteria;Rhizobiales;Rhizobiaceae;Nitratireductor;unknown species	OTU_837	0	0	0	0	1	0	0	0	1	0	0	0	2	0	1	0	0	0	0	0	1	0	0	233	0	0	0	0	0	0	0	0	0	2	0	0	0	0	11	25	27	10	22	38	39	38	6	12
Bacteria;Proteobacteria;Alphaproteobacteria;Rhizobiales;Rhizobiaceae;Phyllobacterium;Multi-affiliation	OTU_348	2	0	2	1	1	1	1	2	1	0	0	0	3	1	0	0	3	0	1	2	0	0	2	1	2	2	0	0	0	0	3	0	1	1	0	0	0	0	5	2	0	3	1	2	0	1	2	1
Bacteria;Proteobacteria;Alphaproteobacteria;Rhizobiales;Rhizobiales Incertae Sedis;Bauldia;unknown species	OTU_198	2	0	0	2	0	2361	1	0	0	2	0	0	1	0	0	1	0	0	1	2	1	1	0	0	5	0	1	0	0	0	1	0	3	2	1	0	0	1	1	3	3	0	0	2	2	2	1	1
Bacteria;Proteobacteria;Alphaproteobacteria;Rhizobiales;Rhizobiales Incertae Sedis;unknown genus;unknown species	OTU_546	0	0	0	0	0	0	1	0	1	0	0	0	0	0	0	0	1	916	0	0	0	0	1	1	0	0	0	0	0	0	0	0	0	0	0	0	0	0	0	0	0	0	0	0	1	0	0	1
Bacteria;Proteobacteria;Alphaproteobacteria;Rhizobiales;Stappiaceae;Labrenzia;Multi-affiliation	OTU_558	2	0	0	0	0	0	1	1	0	0	0	0	0	0	0	0	0	0	0	0	0	860	0	0	2	1	0	0	0	0	1	0	0	0	0	0	0	0	3	0	1	1	4	0	0	1	0	3
Bacteria;Proteobacteria;Alphaproteobacteria;Rhizobiales;Stappiaceae;Labrenzia;Stappia kahanamokuae	OTU_1202	1	0	0	0	0	0	0	0	0	0	0	0	0	1	0	233	0	0	0	1	0	1	0	1	0	0	0	0	0	0	0	0	0	0	0	0	0	0	1	0	3	12	11	1	0	0	5	3
Bacteria;Proteobacteria;Alphaproteobacteria;Rhizobiales;Xanthobacteraceae;Afipia;Multi-affiliation	OTU_302	1481	0	0	1	0	3	266	0	0	0	1	0	1	0	0	1	0	0	0	0	0	0	0	0	3	0	0	0	1	0	0	0	1	0	0	3	0	2	0	0	0	0	1	2	1	0	0	3
Bacteria;Proteobacteria;Alphaproteobacteria;Rhodobacterales;Rhodobacteraceae;Actibacterium;unknown species	OTU_118	3	0	0	0	0	0	3	1	0	0	2	1	1	1	2	1	0	3	2	3	2	1	1	2	4	1	2	0	2	0	2	0	3	3	3	0	3	2	401	262	204	233	415	7	7	13	622	652
Bacteria;Proteobacteria;Alphaproteobacteria;Rhodobacterales;Rhodobacteraceae;Actibacterium;unknown species	OTU_1349	0	0	0	0	0	0	0	0	0	0	0	0	0	0	0	0	0	0	0	0	1	0	1	1	1	0	0	0	2	0	0	0	0	0	0	0	223	0	5	1	1	0	2	2	0	1	9	10
Bacteria;Proteobacteria;Alphaproteobacteria;Rhodobacterales;Rhodobacteraceae;Aestuariivita;Aestuariivita atlantica	OTU_1099	1	0	0	0	1	0	0	0	0	0	0	0	1	0	0	0	0	0	1	0	0	0	0	0	0	0	0	0	0	0	0	0	1	0	0	0	0	0	9	12	4	18	35	2	0	0	76	80
Bacteria;Proteobacteria;Alphaproteobacteria;Rhodobacterales;Rhodobacteraceae;Albirhodobacter;unknown species	OTU_545	0	0	0	0	0	0	0	0	0	0	0	0	0	0	0	0	0	0	0	0	0	1	0	1	0	0	0	0	0	0	0	0	0	0	0	610	200	0	0	0	0	1	0	4	6	8	1	0
Bacteria;Proteobacteria;Alphaproteobacteria;Rhodobacterales;Rhodobacteraceae;Amaricoccus;metagenome	OTU_163	2	0	1	0	0	1	0	2	0	1	1	0	1	1	0	1	1	0	0	0	0	2	0	0	1	0	5	0	1	0	0	0	2	0	3	0	78	0	77	78	49	328	499	4	2	2	189	325
Bacteria;Proteobacteria;Alphaproteobacteria;Rhodobacterales;Rhodobacteraceae;Dinoroseobacter;unknown species	OTU_560	0	0	0	0	0	0	0	0	0	0	0	0	0	0	0	0	1	0	0	1	1	0	0	1	0	0	0	0	1	0	0	0	0	0	1	0	0	1	21	27	31	9	21	4	2	9	31	21
Bacteria;Proteobacteria;Alphaproteobacteria;Rhodobacterales;Rhodobacteraceae;HIMB11;marine metagenome	OTU_721	0	0	0	0	0	0	0	0	0	0	0	0	0	0	0	0	0	0	0	0	0	0	0	0	0	1	0	0	0	0	0	0	0	0	0	0	0	0	28	40	24	20	41	0	1	0	80	202
Bacteria;Proteobacteria;Alphaproteobacteria;Rhodobacterales;Rhodobacteraceae;Jhaorihella;Jhaorihella thermophila	OTU_620	0	1	1	0	0	1	0	1	1	0	0	0	3	0	0	2	0	0	3	1	0	1	1	0	2	1	0	0	1	0	0	0	1	0	0	0	472	0	2	4	0	68	53	0	0	2	55	126
Bacteria;Proteobacteria;Alphaproteobacteria;Rhodobacterales;Rhodobacteraceae;Lentibacter;Multi-affiliation	OTU_966	0	0	0	0	1	2	1	0	0	0	0	0	0	0	0	0	0	0	0	0	0	41	0	0	0	0	0	0	0	0	0	0	52	0	0	0	1	0	0	2	3	0	3	1	3	1	0	0
Bacteria;Proteobacteria;Alphaproteobacteria;Rhodobacterales;Rhodobacteraceae;Litoreibacter;Multi-affiliation	OTU_1160	0	0	0	0	0	0	0	0	0	0	0	0	0	0	0	0	0	0	0	0	0	0	0	264	0	0	0	0	0	0	0	0	0	0	0	0	1	1	0	0	0	0	1	0	2	0	0	1
Bacteria;Proteobacteria;Alphaproteobacteria;Rhodobacterales;Rhodobacteraceae;Litorimicrobium;unknown species	OTU_945	0	0	0	0	0	0	1	1	0	0	1	0	0	1	2	0	388	1	0	0	0	0	0	0	0	0	0	0	0	0	0	0	0	0	1	0	2	0	2	0	1	1	5	0	1	0	1	3
Bacteria;Proteobacteria;Alphaproteobacteria;Rhodobacterales;Rhodobacteraceae;Litorisediminivivens;Litorisediminivivens gilvus	OTU_929	1	0	1	0	0	0	0	2	382	0	1	0	0	1	0	0	0	0	0	0	0	0	338	0	3	1	0	0	0	1	0	0	1	0	0	0	1	1	3	4	4	2	3	0	4	2	2	3
Bacteria;Proteobacteria;Alphaproteobacteria;Rhodobacterales;Rhodobacteraceae;Marivita;unknown species	OTU_931	0	296	0	1	0	1	0	1	0	1	0	0	1	0	0	0	0	0	0	0	0	0	0	0	0	0	0	0	0	0	0	0	1	0	0	0	0	0	6	5	8	20	14	6	9	5	9	14
Bacteria;Proteobacteria;Alphaproteobacteria;Rhodobacterales;Rhodobacteraceae;Multi-affiliation;Multi-affiliation	OTU_32	10	7	6	6	5	10	8	8	4	14	12	5	8	4	6	8	6	1	10	13	6	10	9	3	22	4	6	0	4	0	12	0	5	3	3	0	13	4	10	16	12	21	11	10	11	6	17	14
Bacteria;Proteobacteria;Alphaproteobacteria;Rhodobacterales;Rhodobacteraceae;Multi-affiliation;Multi-affiliation	OTU_47	5	0	4	7	0	4	0	5	0	3	99	4	9	4	3	5	2	0	6	5	3	3	9	1	16	2	2	0	0	0	3	0	12	1	3	0	8	4	5	5	5	7	8	8	6	8	6	10
Bacteria;Proteobacteria;Alphaproteobacteria;Rhodobacterales;Rhodobacteraceae;Multi-affiliation;Multi-affiliation	OTU_374	1	2	1	1	0	1034	0	1	0	1	2	0	2	0	1	0	0	1	2	0	0	1	1	0	1	1	0	0	0	0	1	0	355	1	1	0	0	0	0	3	0	2	0	0	1	2	1	3
Bacteria;Proteobacteria;Alphaproteobacteria;Rhodobacterales;Rhodobacteraceae;Multi-affiliation;Multi-affiliation	OTU_487	1	1	0	0	0	1	2	1	1	1	0	0	1	0	0	0	0	0	1	0	0	0	0	0	0	0	0	0	1	0	1	0	0	0	2	0	1	0	0	0	0	4	1	1	1	2	0	0
Bacteria;Proteobacteria;Alphaproteobacteria;Rhodobacterales;Rhodobacteraceae;Multi-affiliation;Multi-affiliation	OTU_496	1	0	0	0	0	0	3	2	0	0	0	0	0	0	0	1	1	0	1060	1	0	0	0	1	0	0	0	0	0	0	0	0	0	0	2	0	0	1	0	0	4	0	0	0	0	1	0	0
Bacteria;Proteobacteria;Alphaproteobacteria;Rhodobacterales;Rhodobacteraceae;Multi-affiliation;Multi-affiliation	OTU_891	0	0	0	0	1	0	1	0	0	0	0	0	0	0	0	0	0	0	0	0	0	0	0	0	1	0	0	0	0	0	0	0	1	1	0	0	1	0	35	38	14	57	93	13	16	23	67	82
Bacteria;Proteobacteria;Alphaproteobacteria;Rhodobacterales;Rhodobacteraceae;Multi-affiliation;Multi-affiliation	OTU_957	0	0	0	0	0	0	0	0	0	0	136	0	0	0	0	0	0	1	0	0	0	0	0	0	0	0	0	0	0	0	0	0	0	0	0	0	0	2	6	10	7	46	94	1	0	1	17	37
Bacteria;Proteobacteria;Alphaproteobacteria;Rhodobacterales;Rhodobacteraceae;Multi-affiliation;Multi-affiliation	OTU_1215	0	0	0	0	0	0	0	1	0	0	0	1	0	0	0	0	0	0	1	0	0	0	0	0	0	0	0	0	0	0	0	0	0	0	0	0	1	0	7	8	3	6	4	0	0	0	41	129
Bacteria;Proteobacteria;Alphaproteobacteria;Rhodobacterales;Rhodobacteraceae;Paracoccus;Multi-affiliation	OTU_367	0	0	0	0	0	0	0	0	0	0	0	0	0	0	0	0	0	0	0	0	0	0	0	0	0	0	0	1334	0	0	0	0	0	0	0	0	0	0	0	0	0	0	0	0	0	0	0	0
Bacteria;Proteobacteria;Alphaproteobacteria;Rhodobacterales;Rhodobacteraceae;Paracoccus;Multi-affiliation	OTU_372	2	0	0	1	0	2	0	2	0	0	32	0	1	0	0	0	0	0	1	0	1	0	0	0	1	0	0	0	0	0	1	0	0	1	2	0	1	1346	2	2	1	0	0	1	1	1	0	0
Bacteria;Proteobacteria;Alphaproteobacteria;Rhodobacterales;Rhodobacteraceae;Pseudoruegeria;Pseudoruegeria lutimaris	OTU_1079	0	0	0	0	0	0	0	0	0	0	0	0	0	0	0	0	0	0	0	0	0	0	0	0	0	0	0	0	0	0	0	0	0	0	0	0	0	1	13	14	10	54	84	6	8	11	40	47
Bacteria;Proteobacteria;Alphaproteobacteria;Rhodobacterales;Rhodobacteraceae;Rhodovulum;Rhodovulum iodosum	OTU_426	0	1	0	1	0	2	0	0	1	0	0	1	0	0	0	0	1	0	1	1	0	0	1	1	0	2	0	0	0	0	0	0	0	1	1	0	0	0	124	64	107	182	66	1	0	1	55	293
Bacteria;Proteobacteria;Alphaproteobacteria;Rhodobacterales;Rhodobacteraceae;Roseobacter;Sulfitobacter sp.	OTU_761	2	1	1	0	0	0	0	0	0	0	0	0	1	0	0	1	0	0	0	0	0	1	0	0	0	0	0	0	0	0	0	0	0	0	0	0	106	0	5	6	4	27	31	12	17	16	137	192
Bacteria;Proteobacteria;Alphaproteobacteria;Rhodobacterales;Rhodobacteraceae;Roseovarius;unknown species	OTU_1195	0	0	0	1	0	0	0	0	0	0	0	0	0	0	0	1	0	1	0	0	0	0	0	0	268	0	0	0	0	0	0	0	0	0	0	0	0	0	0	0	0	1	0	0	2	1	0	0
Bacteria;Proteobacteria;Alphaproteobacteria;Rhodobacterales;Rhodobacteraceae;Ruegeria;Multi-affiliation	OTU_410	1	0	0	1	0	2	0	1	0	2	276	0	0	1	1	0	1	1	3	465	2	0	0	262	0	1	0	0	0	0	0	0	35	1	0	0	2	0	16	32	16	12	47	9	14	14	15	52
Bacteria;Proteobacteria;Alphaproteobacteria;Rhodobacterales;Rhodobacteraceae;Ruegeria;unknown species	OTU_531	1	0	2	0	0	0	0	0	0	0	0	0	0	0	0	0	1	0	0	1	0	0	1	1	0	0	0	0	0	0	0	0	0	0	0	0	0	1	13	42	14	102	217	7	14	14	68	198
Bacteria;Proteobacteria;Alphaproteobacteria;Rhodobacterales;Rhodobacteraceae;Tateyamaria;unknown species	OTU_64	3	2	2	1	0	6	1	6	0	5	7	1	7	2	2	5	0	2	3	2	2	1	2	4	12	2	2	0	2	0	5	0	260	1	3	0	0	4	3	2	3	5	1	1	1	6	5	9
Bacteria;Proteobacteria;Alphaproteobacteria;Rhodobacterales;Rhodobacteraceae;Thalassobius;Multi-affiliation	OTU_310	0	1	0	1	0	1709	4	2	0	1	0	0	2	0	0	0	1	0	1	0	1	0	0	0	2	1	0	0	0	0	0	0	2	0	2	0	0	0	0	1	3	0	2	0	0	0	1	1
Bacteria;Proteobacteria;Alphaproteobacteria;Rhodobacterales;Rhodobacteraceae;Tropicibacter;Multi-affiliation	OTU_755	2	0	0	0	0	1	199	0	1	0	0	2	0	0	0	1	0	0	0	1	0	1	0	0	1	0	0	0	0	0	1	0	0	0	1	0	0	0	19	13	64	30	124	3	3	2	10	10
Bacteria;Proteobacteria;Alphaproteobacteria;Rhodobacterales;Rhodobacteraceae;Tropicimonas;Multi-affiliation	OTU_926	0	0	0	0	0	0	0	1	0	0	1	0	0	0	1	0	0	0	0	1	0	0	0	0	0	0	0	0	0	0	0	0	1	0	0	0	127	0	79	61	46	9	19	3	2	0	17	28
Bacteria;Proteobacteria;Alphaproteobacteria;Rhodobacterales;Rhodobacteraceae;Tropicimonas;unknown species	OTU_791	0	0	0	0	0	0	1	0	0	0	0	0	1	0	0	0	0	0	0	0	0	0	1	0	0	0	0	0	0	0	0	0	0	0	0	0	3	2	27	33	22	26	25	110	182	166	13	83
Bacteria;Proteobacteria;Alphaproteobacteria;Rhodobacterales;Rhodobacteraceae;unknown genus;Multi-affiliation	OTU_162	2	0	1	1	0	1	1	1	0	2	1	0	3	0	0	1	0	0	3	2	0	3	2	1	5	0	1	0	1	0	0	0	3	1	4	0	0	0	1	0	2	1	1	3	1	0	2	3
Bacteria;Proteobacteria;Alphaproteobacteria;Rhodobacterales;Rhodobacteraceae;unknown genus;Multi-affiliation	OTU_214	0	0	1	2	1	1	1	0	0	0	1	2	0	0	0	1	0	2	0	2	2	0	2	0	0	1	0	0	0	0	0	0	0	0	2	0	0	0	0	0	2	1	0	0	2	3	0	1
Bacteria;Proteobacteria;Alphaproteobacteria;Rhodobacterales;Rhodobacteraceae;unknown genus;Multi-affiliation	OTU_590	0	1	0	0	0	0	0	0	0	0	0	0	1	0	0	0	0	0	0	0	1	0	1	0	0	2	0	0	0	0	0	0	0	0	1	0	1	0	0	0	1	0	0	0	1	0	0	0
Bacteria;Proteobacteria;Alphaproteobacteria;Rhodobacterales;Rhodobacteraceae;unknown genus;Rhodobacterales bacterium JY-7	OTU_1061	0	0	0	0	1	0	0	0	0	0	0	1	0	0	0	1	0	0	0	0	0	0	1	0	0	0	0	0	0	0	2	0	0	0	1	0	0	0	0	0	0	13	39	1	0	0	99	96
Bacteria;Proteobacteria;Alphaproteobacteria;Rhodobacterales;Rhodobacteraceae;unknown genus;unknown species	OTU_363	0	0	1	0	0	1	0	0	0	1	0	0	1	0	0	1	2	0	0	0	0	0	0	0	0	1	1	0	0	0	0	0	0	0	1441	0	1	2	1	1	1	0	2	1	1	0	0	0
Bacteria;Proteobacteria;Alphaproteobacteria;Rhodobacterales;Rhodobacteraceae;unknown genus;unknown species	OTU_640	0	0	0	0	0	0	0	0	0	1	1	0	0	0	0	0	0	0	0	0	0	0	0	0	0	1	0	0	0	0	0	0	0	0	0	0	0	0	2	3	1	5	7	1	3	1	9	1
Bacteria;Proteobacteria;Alphaproteobacteria;Rhodobacterales;Rhodobacteraceae;unknown genus;unknown species	OTU_680	0	0	0	1	0	0	0	0	0	0	0	1	2	0	0	0	0	0	0	1	1	0	0	0	0	0	0	0	1	0	0	0	0	0	0	0	0	1	2	0	0	0	1	0	0	1	0	3
Bacteria;Proteobacteria;Alphaproteobacteria;Rhodobacterales;Rhodobacteraceae;unknown genus;unknown species	OTU_742	1	0	0	0	0	0	0	0	0	0	0	1	0	0	0	0	0	0	0	0	0	0	0	0	0	1	0	0	0	0	0	0	0	0	1	0	1	0	59	46	55	21	15	4	7	3	54	149
Bacteria;Proteobacteria;Alphaproteobacteria;Rhodobacterales;Rhodobacteraceae;unknown genus;unknown species	OTU_844	0	0	0	0	0	1	0	0	0	0	0	0	0	0	0	0	0	0	0	0	0	481	1	0	0	0	1	0	0	0	0	0	0	0	0	0	0	0	3	3	6	1	0	0	0	1	0	0
Bacteria;Proteobacteria;Alphaproteobacteria;Rhodobacterales;Rhodobacteraceae;unknown genus;unknown species	OTU_866	0	0	0	0	0	1	0	1	0	0	0	0	0	0	0	0	0	0	1	1	0	0	0	1	1	0	0	0	0	0	1	0	2	0	0	0	0	0	0	0	0	0	2	0	0	0	2	1
Bacteria;Proteobacteria;Alphaproteobacteria;Rhodobacterales;Rhodobacteraceae;unknown genus;unknown species	OTU_1179	0	0	0	0	0	0	0	0	0	0	0	0	0	0	0	0	0	1	1	0	0	0	0	0	0	0	0	0	0	0	0	0	0	0	0	0	1	0	18	23	24	51	86	6	7	11	12	32
Bacteria;Proteobacteria;Alphaproteobacteria;Rhodospirillales;AEGEAN-169 marine group;unknown genus;Multi-affiliation	OTU_46	3	2	4	9	1	7	9	5	1	5	3	1	5	3	0	5	3	2	8	9	6	4	5	2	18	4	5	0	3	0	7	0	4	3	8	0	6	4	6	8	7	11	6	4	8	6	6	2
Bacteria;Proteobacteria;Alphaproteobacteria;Rhodospirillales;AEGEAN-169 marine group;unknown genus;Multi-affiliation	OTU_689	0	0	1	0	0	0	0	2	0	1	1	0	1	0	0	0	0	0	0	0	0	0	0	1	0	0	0	0	0	0	1	0	0	0	0	0	0	0	0	0	0	0	0	1	0	1	0	0
Bacteria;Proteobacteria;Alphaproteobacteria;Rhodospirillales;AEGEAN-169 marine group;unknown genus;unknown species	OTU_474	0	0	155	0	0	2	0	2	0	1	2	0	1	0	0	2	0	0	0	2	2	1	1	1	3	1	9	0	0	0	1	0	2	1	1	0	0	0	5	0	3	1	2	2	0	3	0	2
Bacteria;Proteobacteria;Alphaproteobacteria;Rhodospirillales;AEGEAN-169 marine group;unknown genus;unknown species	OTU_569	1	0	1	1	0	0	1	0	0	0	0	1	0	0	0	0	1	0	0	1	0	0	0	0	1	1	0	0	0	0	0	0	0	0	1	0	1	1	0	0	0	1	0	1	0	2	0	0
Bacteria;Proteobacteria;Alphaproteobacteria;Rhodospirillales;AEGEAN-169 marine group;unknown genus;unknown species	OTU_673	0	0	0	0	0	0	0	0	0	0	0	0	1	0	0	0	0	0	0	0	0	1	0	0	0	0	0	0	0	0	0	0	0	0	0	0	0	0	0	0	0	0	0	0	0	0	0	0
Bacteria;Proteobacteria;Alphaproteobacteria;Rhodospirillales;Rhodopirillaceae;Defluviicoccus;unknown species	OTU_213	2	0	0	1	0	0	0	0	0	2	0	0	1	0	0	2	0	0	3	0	0	1	2	1	4	1	2	0	1	0	2	0	0	0	3	0	0	2	12	9	22	0	1	130	145	142	3	6
Bacteria;Proteobacteria;Alphaproteobacteria;Rhodospirillales;Terasakiellaceae;unknown genus;unknown species	OTU_607	0	0	0	0	0	0	0	0	0	0	0	0	1	0	0	0	0	0	0	0	0	0	1	0	1	0	0	0	0	0	0	0	0	1	0	0	1	0	0	0	0	0	0	0	0	2	0	0
Bacteria;Proteobacteria;Alphaproteobacteria;Rhodospirillales;Thalassospiraceae;Thalassospira;Thalassospira sp.	OTU_195	1	0	2	1	1	2	3	0	0	917	2	1	1	0	0	1	1	0	1	1	0	2	0	0	2	0	2	0	1	0	2	0	1	1	2	0	0	1515	1	0	2	4	0	0	2	1	2	2
Bacteria;Proteobacteria;Alphaproteobacteria;Rhodovibrionales;Kiloniellaceae;Kiloniella;Kiloniella laminariae	OTU_399	3	0	0	4	0	1	0	0	0	3	0	0	1	0	0	0	1	0	1	0	0	0	0	0	1	1	0	0	0	0	2	0	1	1	0	0	1	0	1	5	2	2	0	5	2	1	9	2
Bacteria;Proteobacteria;Alphaproteobacteria;Rhodovibrionales;Kiloniellaceae;Pelagibius;Multi-affiliation	OTU_1417	0	0	0	0	0	1	0	1	0	0	0	0	1	0	1	165	0	0	0	0	0	0	0	1	0	0	0	0	1	0	3	0	0	1	0	0	0	0	30	19	20	43	17	0	1	1	14	18
Bacteria;Proteobacteria;Alphaproteobacteria;Rhodovibrionales;Kiloniellaceae;Pelagibius;unknown species	OTU_1150	0	0	0	0	0	0	0	0	0	0	0	0	0	0	0	280	0	0	0	0	0	0	0	0	0	0	0	0	0	0	1	0	0	0	0	0	0	0	0	0	1	2	1	1	0	0	0	1
Bacteria;Proteobacteria;Alphaproteobacteria;Rickettsiales;Midichloriaceae;MD3-55;unknown species	OTU_458	1	1	0	2	0	0	0	0	0	1	0	0	1208	0	0	1	0	0	0	0	0	1	0	0	2	1	0	0	0	0	0	0	0	1	0	0	0	1	1	0	1	0	0	0	2	0	0	0
Bacteria;Proteobacteria;Alphaproteobacteria;Rickettsiales;Mitochondria;unknown genus;Multi-affiliation	OTU_408	1	0	0	0	0	1	1	1	0	0	0	1	0	0	0	0	0	0	0	0	0	3	0	0	2	0	0	0	0	12	0	0	0	0	1321	1	0	0	0	0	0	1	0	0	1	0	0	1
Bacteria;Proteobacteria;Alphaproteobacteria;Rickettsiales;Mitochondria;unknown genus;Multi-affiliation	OTU_666	0	0	0	0	0	0	0	0	0	0	0	0	0	0	1	0	0	0	0	1	0	693	0	0	1	0	0	0	1	0	0	0	0	0	1	0	1	0	0	0	0	0	0	0	0	0	0	0
Bacteria;Proteobacteria;Alphaproteobacteria;Rickettsiales;Rickettsiaceae;Candidatus Trichorickettsia;Candidatus Trichorickettsia mobilis	OTU_6	62	23	33	48	20	50	65	32	22	9246	33	32	56	37	19	958	25	22	66	44	39	44	63	33	57138	48	34	0	51	0	56	0	58	34	59	0	52	36	56	48	57	67	45	49	62	53	50	46
Bacteria;Proteobacteria;Alphaproteobacteria;Rickettsiales;Rickettsiaceae;Candidatus Trichorickettsia;Candidatus Trichorickettsia mobilis	OTU_819	0	0	0	498	0	0	1	0	0	0	0	0	0	0	0	0	0	0	0	0	0	0	1	0	2	0	0	0	0	0	1	0	2	0	0	0	0	0	0	0	0	0	0	0	0	0	0	1
Bacteria;Proteobacteria;Alphaproteobacteria;Rickettsiales;Rickettsiaceae;unknown genus;metagenome	OTU_587	0	0	0	0	0	1	2	0	0	0	788	0	1	0	0	1	0	0	1	0	0	0	0	0	0	0	1	0	0	0	0	0	0	1	0	0	0	0	2	0	0	2	0	0	0	1	0	1
Bacteria;Proteobacteria;Alphaproteobacteria;Rickettsiales;S25-593;unknown genus;unknown species	OTU_377	1	0	1	1	0	0	0	1	0	1	0	0	0	0	0	1	0	0	1	0	0	0	3	1	3	1	0	0	1	0	0	0	0	0	1	0	1	0	1	4	2	2	0	0	1	1	0	2
Bacteria;Proteobacteria;Alphaproteobacteria;Rickettsiales;S25-593;unknown genus;unknown species	OTU_578	0	0	0	0	0	0	0	0	0	0	0	0	0	0	0	0	1	0	1	1	0	0	0	1	0	1	0	0	0	0	0	0	1	0	0	0	0	1	0	0	0	1	0	0	1	0	2	0
Bacteria;Proteobacteria;Alphaproteobacteria;Rickettsiales;SM2D12;unknown genus;unknown species	OTU_663	1	1	0	0	0	0	1	0	0	0	0	0	0	0	0	1	0	0	1	654	1	1	0	0	1	0	0	0	1	0	0	0	0	0	0	0	0	0	0	1	0	1	0	0	2	0	0	0
Bacteria;Proteobacteria;Alphaproteobacteria;SAR11 clade;Clade I;Multi-affiliation;Multi-affiliation	OTU_13	19	11	14	24	9	33	36	38	11	29	28	20	33	9	7	17	12	455	19	280	21	18	30	17	56	23	13	0	14	0	24	0	33	17	26	0	52	21	22	21	19	29	22	23	34	20	32	22
Bacteria;Proteobacteria;Alphaproteobacteria;SAR11 clade;Clade I;Multi-affiliation;Multi-affiliation	OTU_140	0	0	1	1	1	1	0	3	0	3	3	0	0	0	3	2	1	0	1	4	2	4	2	1	4	0	1	0	1	0	0	0	1	0	1	0	2	1	1	4	0	0	2	4	4	1	0	3
Bacteria;Proteobacteria;Alphaproteobacteria;SAR11 clade;Clade II;unknown genus;unknown species	OTU_344	0	0	1	1	0	0	0	1	0	0	0	0	1	0	0	0	0	0	0	1	1	1	0	0	0	0	0	0	0	0	0	0	0	0	0	0	0	0	1	0	0	2	0	0	0	1	0	0
Bacteria;Proteobacteria;Alphaproteobacteria;SAR11 clade;Clade II;unknown genus;unknown species	OTU_1124	0	0	0	1	0	0	1	0	0	2	0	0	0	0	0	0	0	0	1	0	0	0	0	0	1	1	0	0	0	0	0	0	0	0	0	0	1	0	0	1	0	0	0	1	0	0	0	1
Bacteria;Proteobacteria;Alphaproteobacteria;SAR11 clade;Clade II;unknown genus;unknown species	OTU_1127	0	0	0	0	0	0	0	0	0	0	0	0	1	0	0	0	0	0	0	0	0	0	1	0	0	0	0	0	0	0	0	0	0	0	0	0	0	0	0	0	0	0	0	0	1	0	0	0
Bacteria;Proteobacteria;Alphaproteobacteria;SAR11 clade;Clade II;unknown genus;unknown species	OTU_1190	0	1	0	0	0	0	0	0	0	0	0	0	0	0	0	0	0	0	0	1	0	0	0	0	0	0	0	0	0	0	0	0	0	1	0	0	0	0	0	0	0	0	0	1	0	0	1	0
Bacteria;Proteobacteria;Alphaproteobacteria;SAR11 clade;Clade III;unknown genus;unknown species	OTU_250	3	0	0	1	0	5	0	1	1	3	0	1	0	1	1	0	0	0	1	1	2	0	3	0	3	1	0	0	0	0	0	0	41	0	0	0	3	2	1	0	2	1	1	2	4	2	0	3
Bacteria;Proteobacteria;Alphaproteobacteria;SAR11 clade;Clade IV;unknown genus;unknown species	OTU_502	0	0	0	1	1	0	0	0	0	0	0	0	0	1	0	0	0	0	1	0	0	0	0	0	1	0	0	0	0	0	0	0	0	0	0	0	0	0	1	1	0	0	2	2	0	1	0	0
Bacteria;Proteobacteria;Alphaproteobacteria;SAR11 clade;Clade IV;unknown genus;unknown species	OTU_848	0	0	1	0	0	0	0	1	0	0	0	0	0	0	0	0	0	0	0	0	1	0	0	1	0	0	0	0	0	0	0	0	0	0	0	0	1	0	1	0	0	1	0	0	1	0	1	0
Bacteria;Proteobacteria;Alphaproteobacteria;SAR11 clade;Multi-affiliation;Multi-affiliation;Multi-affiliation	OTU_10	19	13	11	22	4	19	36	33	8	12	17	13	21	11	4	8	6	8	21	27	12	15	21	14	30	13	6	0	11	0	11	0	21	16	18	0	27	23	15	20	16	25	12	23	21	25	11	20
Bacteria;Proteobacteria;Alphaproteobacteria;Sphingomonadales;Sphingomonadaceae;Erythrobacter;unknown species	OTU_490	2	0	0	0	0	1	0	0	2	0	0	1	0	0	0	0	0	0	0	0	1	2	0	0	3	0	1	0	1	0	1	0	0	1	0	0	0	0	3	6	3	38	36	1	2	0	2	0
Bacteria;Proteobacteria;Alphaproteobacteria;Sphingomonadales;Sphingomonadaceae;Multi-affiliation;Multi-affiliation	OTU_242	2	2	1	1	0	1	1	0	1	0	0	2	1	0	2491	0	0	0	1	1	1	0	1	0	3	0	2	0	2	0	1	0	0	1	0	0	1	3	0	1	3	1	1	2	4	1	1	0
Bacteria;Proteobacteria;Alphaproteobacteria;Sphingomonadales;Sphingomonadaceae;Multi-affiliation;Multi-affiliation	OTU_1093	1	0	237	0	0	0	0	0	0	1	0	0	0	0	1	0	1	0	0	1	0	0	0	0	1	0	11	0	0	0	0	0	0	0	0	0	2	0	0	0	0	0	1	1	0	0	0	0
Bacteria;Proteobacteria;Alphaproteobacteria;Sphingomonadales;Sphingomonadaceae;Novosphingobium;unknown species	OTU_622	0	702	0	2	0	3	0	3	0	0	0	1	2	1	1	0	1	2	0	1	0	0	4	1	2	0	1	0	0	0	0	0	1	0	1	0	1	0	2	1	0	1	1	0	0	0	0	0
Bacteria;Proteobacteria;Alphaproteobacteria;Sphingomonadales;Sphingomonadaceae;Sphingomonas;Multi-affiliation	OTU_68	2810	2	35	4	0	6	3	6	2	5	3	805	3	3	7	1	2	5	2	6	2	11	3	3	13	3	3808	0	2	0	4	0	109	4	6	0	156	829	7	6	8	7	2	4	3	9	7	5
Bacteria;Proteobacteria;Alphaproteobacteria;Sphingomonadales;Sphingomonadaceae;Sphingomonas;Multi-affiliation	OTU_863	3	0	0	1	0	1	0	0	0	0	0	1	1	0	432	0	0	0	0	0	0	0	0	0	2	0	0	0	0	0	0	0	0	0	0	0	1	0	0	0	0	0	0	0	0	0	1	0
Bacteria;Proteobacteria;Alphaproteobacteria;Sphingomonadales;Sphingomonadaceae;Sphingomonas;Sphingomonas sp.	OTU_420	3	0	0	1	0	0	0	0	0	0	1	0	0	1	0	1	0	0	1	0	0	1194	0	0	1	0	0	0	0	0	2	0	0	0	0	0	1	0	1	0	1	0	0	0	1	0	1	0
Bacteria;Proteobacteria;Alphaproteobacteria;Sphingomonadales;Sphingomonadaceae;Sphingomonas;unknown species	OTU_653	1	0	0	0	0	1	700	2	0	1	1	0	1	0	0	0	1	0	0	0	0	0	0	0	2	0	2	0	0	0	0	0	0	0	1	0	1	0	0	0	0	0	1	0	0	0	2	0
Bacteria;Proteobacteria;Alphaproteobacteria;Sphingomonadales;Sphingomonadaceae;Sphingomonas;unknown species	OTU_1208	1	0	0	0	0	1	0	0	0	0	0	0	0	0	0	0	0	0	0	0	0	0	0	0	1	1	0	0	0	0	0	0	0	0	0	0	1	0	0	0	0	0	0	0	0	0	0	0
Bacteria;Proteobacteria;Alphaproteobacteria;Thalassobaculales;Nisaeaceae;OM75 clade;marine metagenome	OTU_1118	0	0	0	0	0	0	0	0	0	1	0	0	0	0	1	0	0	0	0	0	1	0	0	0	0	0	0	0	0	0	0	0	0	0	0	0	0	0	0	0	0	0	0	0	0	1	0	1
Bacteria;Proteobacteria;Alphaproteobacteria;unknown order;unknown family;unknown genus;Multi-affiliation	OTU_641	1	0	1	0	0	2	0	0	0	1	1	0	1	0	0	0	0	1	0	0	1	0	0	0	0	0	0	0	1	0	0	0	0	0	0	0	0	0	0	0	1	2	0	0	2	0	1	0
Bacteria;Proteobacteria;Alphaproteobacteria;unknown order;unknown family;unknown genus;unknown species	OTU_688	0	614	1	0	1	1	2	0	0	1	0	0	1	0	0	1	0	0	0	0	0	0	0	0	0	0	0	0	0	0	0	0	0	1	1	0	1	0	0	0	1	5	2	2	1	0	0	1
Bacteria;Proteobacteria;Deltaproteobacteria;Bdellovibrionales;Bacteriovoracaceae;Halobacteriovorax;Bacteriovorax sp.	OTU_1291	0	0	0	0	0	0	0	0	0	0	0	0	0	0	0	0	0	0	0	0	0	0	0	0	0	0	0	0	0	0	0	0	255	0	0	0	1	0	2	0	1	2	0	0	0	0	0	0
Bacteria;Proteobacteria;Deltaproteobacteria;Deltaproteobacteria Incertae Sedis;unknown family;Deferrisoma;unknown species	OTU_483	0	0	1	1	0	0	0	1	2	0	1	0	1	0	0	1	1	0	0	0	0	3	0	0	0	0	0	0	0	0	0	0	0	0	0	0	0	0	3	8	2	63	26	0	1	2	302	398
Bacteria;Proteobacteria;Deltaproteobacteria;Deltaproteobacteria Incertae Sedis;unknown family;Deferrisoma;unknown species	OTU_780	0	0	0	0	0	0	0	1	1	2	0	0	0	0	0	0	0	1	0	0	1	0	0	0	0	0	0	0	0	0	0	0	0	0	0	0	1	1	53	40	9	64	32	0	0	1	155	152
Bacteria;Proteobacteria;Deltaproteobacteria;Deltaproteobacteria Incertae Sedis;unknown family;Deferrisoma;unknown species	OTU_1750	0	0	0	0	0	0	0	0	1	0	0	0	0	0	0	0	0	0	0	0	0	0	1	0	1	0	0	0	0	0	0	0	0	0	0	0	0	0	89	70	124	5	4	0	1	0	4	2
Bacteria;Proteobacteria;Deltaproteobacteria;Desulfarculales;Desulfarculaceae;Desulfatiglans;unknown species	OTU_166	0	0	0	0	2	2	1	3	0	0	4	0	2	1	0	0	2	0	1	3	0	1	2	0	1	3	0	0	0	0	1	0	0	2	0	0	1340	1	7	47	5	315	576	1	2	1	175	162
Bacteria;Proteobacteria;Deltaproteobacteria;Desulfarculales;Desulfarculaceae;Desulfatiglans;unknown species	OTU_168	1	1	2	1	0	0	0	1	1	3	236	0	0	0	0	1	2	0	0	2	0	3	1551	113	1	0	0	0	0	0	1	0	0	0	0	0	3	0	2	2	0	3	4	508	436	382	1	1
Bacteria;Proteobacteria;Deltaproteobacteria;Desulfarculales;Desulfarculaceae;Desulfatiglans;unknown species	OTU_226	1	1	0	0	0	1	3	1	0	0	0	0	2	1	1	1	0	0	1	2	0	290	321	130	1	0	0	0	0	0	1	0	0	2	1	0	286	0	29	60	11	60	79	255	273	207	41	32
Bacteria;Proteobacteria;Deltaproteobacteria;Desulfarculales;Desulfarculaceae;Desulfatiglans;unknown species	OTU_524	0	0	1	1	1	0	1	0	0	1	0	1	1	0	0	0	0	1	0	1	1	0	772	0	0	0	0	0	0	0	0	0	0	0	0	0	0	0	16	15	10	2	2	42	48	38	11	6
Bacteria;Proteobacteria;Deltaproteobacteria;Desulfarculales;Desulfarculaceae;Desulfatiglans;unknown species	OTU_834	0	0	0	0	0	1	0	0	1	0	0	0	1	0	0	0	0	0	0	1	0	0	0	0	0	0	0	0	0	0	0	0	1	0	0	0	83	0	0	2	0	105	277	0	1	0	10	11
Bacteria;Proteobacteria;Deltaproteobacteria;Desulfarculales;Desulfarculaceae;Desulfatiglans;unknown species	OTU_1141	0	0	0	0	1	0	0	1	0	0	1	0	0	0	0	0	0	0	0	0	0	0	289	0	0	0	0	0	0	0	0	0	0	0	0	0	0	0	1	0	0	0	0	10	16	8	0	0
Bacteria;Proteobacteria;Deltaproteobacteria;Desulfobacterales;Desulfobacteraceae;Desulfobacterium;unknown species	OTU_160	0	1	0	0	1	2	0	1	0	1	0	0	0	1	1	0	0	0	0	0	0	1065	1967	0	1	1	1	0	0	0	0	0	0	0	1	0	1	0	1	2	2	1	0	1	2	0	0	0
Bacteria;Proteobacteria;Deltaproteobacteria;Desulfobacterales;Desulfobacteraceae;Desulfobacterium;unknown species	OTU_459	0	1	1	0	0	0	2	0	0	0	1	0	0	0	1	0	0	0	0	0	0	0	0	1	0	1	1	0	1	0	0	0	0	0	0	0	1	1182	0	0	1	0	0	0	0	0	1	0
Bacteria;Proteobacteria;Deltaproteobacteria;Desulfobacterales;Desulfobacteraceae;Desulfocella;Desulfocella halophila	OTU_383	0	0	0	2	0	1	0	0	0	0	0	0	1	0	0	0	0	0	0	1	1	1	1	0	0	0	0	0	0	0	1391	0	0	0	0	0	0	0	0	1	0	8	4	0	0	0	2	2
Bacteria;Proteobacteria;Deltaproteobacteria;Desulfobacterales;Desulfobacteraceae;Desulfocella;unknown species	OTU_381	1	0	200	148	0	0	2	0	0	0	0	0	2	0	0	1	1	123	1	924	0	0	2	0	0	0	11	0	0	0	0	0	0	0	0	0	0	0	0	0	0	0	0	2	3	2	1	0
Bacteria;Proteobacteria;Deltaproteobacteria;Desulfobacterales;Desulfobacteraceae;Desulfococcus;unknown species	OTU_1228	0	0	0	0	0	0	0	0	0	0	0	0	0	0	0	0	0	0	0	0	0	0	253	0	0	0	0	0	0	0	0	0	0	0	0	0	0	0	0	0	0	0	0	3	3	3	0	0
Bacteria;Proteobacteria;Deltaproteobacteria;Desulfobacterales;Desulfobacteraceae;Desulfosarcina;unknown species	OTU_841	0	1	0	1	0	0	0	1	485	0	0	1	0	0	0	0	0	0	0	2	0	0	1	0	0	0	0	0	0	0	0	0	0	0	0	0	0	0	1	1	4	1	0	1	1	1	0	1
Bacteria;Proteobacteria;Deltaproteobacteria;Desulfobacterales;Desulfobacteraceae;SEEP-SRB1;unknown species	OTU_248	0	2	0	1	0	1	0	2	0	0	0	2	0	0	0	0	0	0	0	1073	0	560	350	0	0	1	1	0	0	0	0	0	1	0	0	0	0	1	0	0	1	0	2	36	37	31	0	1
Bacteria;Proteobacteria;Deltaproteobacteria;Desulfobacterales;Desulfobacteraceae;SEEP-SRB1;unknown species	OTU_355	1	0	135	1	0	0	1	126	0	0	0	0	0	1	0	0	0	0	2	1	1	331	162	385	235	1	5	0	0	0	0	0	0	0	0	0	1	0	0	1	0	2	0	102	115	104	0	0
Bacteria;Proteobacteria;Deltaproteobacteria;Desulfobacterales;Desulfobacteraceae;SEEP-SRB1;unknown species	OTU_504	1	0	1	0	0	1	0	1	0	313	1	1	534	0	1	2	2	0	1	2	0	0	2	0	1	1	0	0	0	0	0	0	0	0	0	0	1	1	1	0	0	0	1	72	54	41	0	1
Bacteria;Proteobacteria;Deltaproteobacteria;Desulfobacterales;Desulfobacteraceae;SEEP-SRB1;unknown species	OTU_675	0	0	0	0	0	0	1	0	0	0	0	1	0	0	0	0	0	0	0	1	0	0	0	464	0	0	0	0	0	0	0	0	0	0	0	0	1	0	6	7	8	13	11	28	42	29	18	37
Bacteria;Proteobacteria;Deltaproteobacteria;Desulfobacterales;Desulfobacteraceae;SEEP-SRB1;unknown species	OTU_799	0	0	0	0	328	1	0	0	0	0	1	0	0	0	0	0	0	0	0	0	0	0	1	0	0	0	0	0	0	0	0	0	0	0	0	0	1	0	50	26	29	3	9	54	56	38	2	0
Bacteria;Proteobacteria;Deltaproteobacteria;Desulfobacterales;Desulfobacteraceae;SEEP-SRB1;unknown species	OTU_989	0	0	0	0	0	0	0	0	0	0	1	0	0	0	0	0	0	0	0	0	0	0	1	283	1	0	0	0	0	0	0	0	1	0	0	0	0	0	0	0	1	1	0	39	30	18	0	0
Bacteria;Proteobacteria;Deltaproteobacteria;Desulfobacterales;Desulfobacteraceae;Sva0081 sediment group;unknown species	OTU_1301	0	0	0	0	0	0	1	0	0	0	0	0	0	0	0	0	0	0	0	1	0	0	0	0	0	0	0	0	0	0	0	0	0	0	1	0	1	0	111	74	127	1	3	19	22	28	0	1
Bacteria;Proteobacteria;Deltaproteobacteria;Desulfobacterales;Desulfobacteraceae;unknown genus;unknown species	OTU_152	0	2	1	308	1	0	0	372	0	0	312	3	1	2	3	84	2	0	2	1	2	1	78	179	745	898	0	0	0	0	2	0	0	1	1	0	5	0	3	0	1	3	2	230	267	173	2	4
Bacteria;Proteobacteria;Deltaproteobacteria;Desulfobacterales;Desulfobacteraceae;unknown genus;unknown species	OTU_211	2	0	0	465	1	0	0	0	0	0	77	0	3	0	0	0	1	0	0	0	0	0	873	1	464	2	0	0	1	0	2	0	1	1	2	0	4	0	2	0	1	2	1	182	194	136	2	1
Bacteria;Proteobacteria;Deltaproteobacteria;Desulfobacterales;Desulfobacteraceae;unknown genus;unknown species	OTU_512	1	0	906	0	0	0	0	0	0	0	0	0	122	0	0	1	0	0	2	1	0	2	0	1	0	1	36	0	2	0	0	0	1	0	1	0	1	0	8	12	53	0	2	63	41	40	3	0
Bacteria;Proteobacteria;Deltaproteobacteria;Desulfobacterales;Desulfobacteraceae;unknown genus;unknown species	OTU_630	0	0	0	1	0	0	1	378	0	0	82	0	0	0	0	0	0	0	1	0	0	0	125	0	0	0	0	0	0	0	0	0	88	0	0	0	0	0	0	0	0	0	5	22	22	25	0	0
Bacteria;Proteobacteria;Deltaproteobacteria;Desulfobacterales;Desulfobacteraceae;unknown genus;unknown species	OTU_813	1	0	0	1	0	0	0	0	0	0	0	0	0	0	0	0	0	0	356	0	0	0	0	141	1	0	0	0	0	0	0	0	0	1	0	0	1	0	0	0	0	0	0	1	1	1	0	0
Bacteria;Proteobacteria;Deltaproteobacteria;Desulfobacterales;Desulfobacteraceae;unknown genus;unknown species	OTU_864	0	0	0	0	0	0	0	0	1	0	0	0	0	0	0	0	1	0	0	1	0	0	0	498	0	0	0	0	0	0	0	0	0	0	0	0	0	0	0	0	1	2	1	0	1	3	0	1
Bacteria;Proteobacteria;Deltaproteobacteria;Desulfobacterales;Desulfobacteraceae;unknown genus;unknown species	OTU_1101	0	0	0	0	0	1	1	1	0	4	0	0	2	0	1	1	0	1	0	2	2	1	0	82	2	0	0	0	0	0	0	0	1	0	0	0	132	1	38	17	74	0	3	0	0	2	3	1
Bacteria;Proteobacteria;Deltaproteobacteria;Desulfobacterales;Desulfobacteraceae;unknown genus;unknown species	OTU_1113	0	0	1	0	0	0	0	101	0	0	73	0	1	0	0	0	0	0	1	0	0	0	0	0	0	0	0	0	0	0	0	0	0	0	0	0	0	0	0	0	0	0	0	35	55	44	1	0
Bacteria;Proteobacteria;Deltaproteobacteria;Desulfobacterales;Desulfobacteraceae;unknown genus;unknown species	OTU_1128	0	0	0	0	0	0	0	0	0	0	118	0	0	0	0	0	0	0	0	0	0	0	0	1	0	0	0	0	0	0	0	0	0	0	0	0	0	0	0	0	0	0	0	60	72	53	0	0
Bacteria;Proteobacteria;Deltaproteobacteria;Desulfobacterales;Desulfobacteraceae;unknown genus;unknown species	OTU_1232	1	0	0	0	0	1	252	0	0	0	0	0	0	0	1	0	0	0	0	0	0	1	0	0	0	0	0	0	0	0	0	0	0	0	0	0	0	0	1	1	0	0	0	0	0	0	0	0
Bacteria;Proteobacteria;Deltaproteobacteria;Desulfobacterales;Desulfobacteraceae;unknown genus;unknown species	OTU_1779	0	0	0	0	0	0	0	113	0	0	0	0	0	0	0	1	0	0	0	0	0	0	0	126	0	0	0	0	0	0	0	0	0	0	0	0	0	0	0	0	0	0	0	6	4	9	0	0
Bacteria;Proteobacteria;Deltaproteobacteria;Desulfobacterales;Desulfobulbaceae;Desulfobulbus;unknown species	OTU_245	0	1	0	0	0	1	0	1	1	0	1	0	0	0	0	0	0	0	0	0	1	0	0	1	0	3	0	0	0	0	1	0	46	1	0	0	0	0	289	359	493	596	127	18	7	4	0	2
Bacteria;Proteobacteria;Deltaproteobacteria;Desulfobacterales;Desulfobulbaceae;Desulfobulbus;unknown species	OTU_465	2	0	1	0	0	1158	0	1	0	0	1	0	0	0	0	0	0	0	0	1	1	0	4	0	0	0	2	0	0	0	0	0	0	0	0	0	0	0	0	1	0	0	0	2	1	1	0	1
Bacteria;Proteobacteria;Deltaproteobacteria;Desulfobacterales;Desulfobulbaceae;Desulfobulbus;unknown species	OTU_1017	0	0	0	0	0	0	0	0	0	0	1	0	0	0	0	0	0	0	0	0	0	0	1	0	0	0	0	0	0	0	0	0	0	0	0	0	0	0	88	78	182	1	1	0	0	1	0	0
Bacteria;Proteobacteria;Deltaproteobacteria;Desulfobacterales;Desulfobulbaceae;Desulfopila;unknown species	OTU_333	1	2	1	700	560	1	0	1	0	2	58	0	1	0	0	0	1	0	0	0	0	1	1	0	295	1	0	0	1	0	0	0	0	0	0	0	0	1	2	4	1	3	0	7	10	25	2	1
Bacteria;Proteobacteria;Deltaproteobacteria;Desulfobacterales;Desulfobulbaceae;Desulforhopalus;unknown species	OTU_683	1	0	0	0	1	1	1	1	0	0	242	0	0	0	1	0	379	0	0	0	0	0	0	2	0	1	0	0	0	0	0	0	0	0	1	0	0	0	2	1	2	0	0	4	15	13	1	1
Bacteria;Proteobacteria;Deltaproteobacteria;Desulfobacterales;Desulfobulbaceae;Desulfurivibrio;unknown species	OTU_384	0	0	0	0	1	1	0	2	0	1	0	1	2	1	0	0	1	1	2	0	0	0	0	2	2	0	1	0	0	0	0	0	1	0	0	0	1	1	116	140	274	670	116	4	1	0	2	0
Bacteria;Proteobacteria;Deltaproteobacteria;Desulfobacterales;Desulfobulbaceae;Desulfurivibrio;unknown species	OTU_916	0	0	0	0	0	0	0	0	0	0	0	0	0	0	0	1	0	0	0	0	0	0	0	0	0	1	1	0	0	0	0	0	0	0	0	0	0	0	117	67	244	0	0	0	0	0	0	1
Bacteria;Proteobacteria;Deltaproteobacteria;Desulfobacterales;Desulfobulbaceae;Dissulfuribacter;Dissulfuribacter thermophilus	OTU_138	0	1	1	0	0	0	1	3	0	0	1	2	1	1	2	1	1	0	1	1	2	0	4	0	4	1	0	0	0	0	3	0	1	1	3	0	2	0	13	92	10	2525	372	3	2	3	82	119
Bacteria;Proteobacteria;Deltaproteobacteria;Desulfobacterales;Desulfobulbaceae;unknown genus;unknown species	OTU_240	0	1	1	2	0	0	0	0	0	1	0	0	2	0	0	1	0	1	2	0	0	0	2	0	1	1	8	0	0	0	0	0	2	0	1	0	1	0	0	0	0	1	1	1	2	2	0	1
Bacteria;Proteobacteria;Deltaproteobacteria;Desulfobacterales;Desulfobulbaceae;unknown genus;unknown species	OTU_304	0	0	0	1	0	0	1	2	0	0	1	0	0	0	0	0	1	1	2	0	0	0	3	1	0	0	0	0	0	0	1	0	1	0	0	0	135	0	17	45	12	374	154	0	2	0	364	273
Bacteria;Proteobacteria;Deltaproteobacteria;Desulfobacterales;Desulfobulbaceae;unknown genus;unknown species	OTU_463	0	0	0	0	0	0	0	1	0	0	0	0	0	0	0	0	0	0	1	1	1	0	0	0	2	2	0	0	0	0	0	0	0	0	0	0	0	0	85	245	33	588	130	1	0	0	96	98
Bacteria;Proteobacteria;Deltaproteobacteria;Desulfobacterales;Desulfobulbaceae;unknown genus;unknown species	OTU_696	0	0	0	0	0	0	1	1	0	0	0	0	1	0	0	0	0	0	0	0	0	1	1	0	0	0	0	0	0	0	0	0	0	0	0	0	0	0	12	13	1	44	35	5	10	7	46	27
Bacteria;Proteobacteria;Deltaproteobacteria;Desulfobacterales;Desulfobulbaceae;unknown genus;unknown species	OTU_739	0	1	0	0	0	0	1	0	0	0	1	0	0	0	0	0	0	0	0	0	0	0	0	0	1	0	0	0	0	0	1	0	0	0	0	0	1	0	22	17	15	238	22	0	0	0	60	111
Bacteria;Proteobacteria;Deltaproteobacteria;Desulfobacterales;Desulfobulbaceae;unknown genus;unknown species	OTU_770	0	1	0	0	0	1	306	2	0	1	1	0	1	1	0	0	0	0	0	0	0	0	0	0	1	523	0	0	0	0	2	0	0	0	0	0	0	2	7	7	20	1	1	1	1	4	3	1
Bacteria;Proteobacteria;Deltaproteobacteria;Desulfobacterales;Desulfobulbaceae;unknown genus;unknown species	OTU_773	0	0	0	0	0	0	0	0	0	0	0	0	0	0	0	0	0	0	1	0	0	0	0	0	0	1	0	0	1	0	0	0	1	0	0	0	0	0	31	135	15	381	48	0	0	1	3	5
Bacteria;Proteobacteria;Deltaproteobacteria;Desulfobacterales;Desulfobulbaceae;unknown genus;unknown species	OTU_809	0	0	0	0	0	0	0	0	0	0	0	0	0	0	0	0	0	0	1	0	0	0	0	0	1	0	0	0	0	0	0	0	0	0	0	0	306	0	6	9	2	84	114	0	0	0	0	2
Bacteria;Proteobacteria;Deltaproteobacteria;Desulfobacterales;Desulfobulbaceae;unknown genus;unknown species	OTU_1008	0	0	0	0	1	0	0	0	0	0	0	0	0	0	0	0	0	0	0	0	0	0	0	0	0	0	0	0	0	0	0	0	0	0	0	0	361	0	0	0	0	1	1	0	0	0	1	0
Bacteria;Proteobacteria;Deltaproteobacteria;Desulfobacterales;Desulfobulbaceae;unknown genus;unknown species	OTU_1022	0	0	0	0	0	0	0	0	0	0	0	0	1	0	1	0	0	0	0	0	1	0	0	0	1	0	1	0	0	0	0	0	0	0	0	0	1	0	88	69	171	5	1	0	0	3	0	2
Bacteria;Proteobacteria;Deltaproteobacteria;Desulfobacterales;Desulfobulbaceae;unknown genus;unknown species	OTU_1095	0	0	1	0	0	0	0	1	0	0	0	0	0	0	0	0	0	0	0	0	0	0	1	87	0	0	0	0	0	0	0	0	0	0	0	0	0	0	0	0	0	0	1	85	86	61	0	0
Bacteria;Proteobacteria;Deltaproteobacteria;Desulfobacterales;Desulfobulbaceae;unknown genus;unknown species	OTU_1149	0	0	0	0	0	0	0	0	0	0	0	0	0	0	0	0	0	0	0	0	0	0	0	0	0	0	0	0	0	0	0	0	0	0	0	0	288	0	1	4	12	0	1	0	0	0	0	0
Bacteria;Proteobacteria;Deltaproteobacteria;Desulfobacterales;Desulfobulbaceae;unknown genus;unknown species	OTU_1207	0	0	0	0	0	0	0	0	0	0	0	0	2	0	0	0	0	0	0	0	0	0	318	0	1	0	0	0	0	0	0	0	0	0	0	0	0	0	1	4	0	3	0	0	0	0	0	0
Bacteria;Proteobacteria;Deltaproteobacteria;Desulfobacterales;Desulfobulbaceae;unknown genus;unknown species	OTU_1410	0	0	0	0	0	1	0	0	0	0	1	0	1	0	0	0	0	1	0	1	0	0	1	0	1	0	0	0	0	0	0	0	0	0	0	0	160	0	14	16	44	0	1	0	0	0	0	0
Bacteria;Proteobacteria;Deltaproteobacteria;Desulfuromonadales;Desulfuromonadaceae;Desulfuromusa;Desulfuromusa bakii	OTU_126	2	1	1	0	1	1	2	173	1	0	1277	0	2	3	1	6	0	1	1	2	0	0	5	3	493	0	1	0	3	0	1	0	4	1	0	0	1	0	3	4	4	1	1	337	311	226	2	1
Bacteria;Proteobacteria;Deltaproteobacteria;Desulfuromonadales;Desulfuromonadaceae;Desulfuromusa;unknown species	OTU_747	1	0	0	1	0	0	0	1	0	0	2	0	1	0	0	0	0	0	0	0	1	0	0	0	0	0	0	0	0	0	0	0	0	0	1	0	0	0	21	42	33	7	18	0	1	0	72	47
Bacteria;Proteobacteria;Deltaproteobacteria;Desulfuromonadales;Desulfuromonadaceae;Desulfuromusa;unknown species	OTU_890	0	0	0	1	1	2	0	1	0	1	0	0	1	1	0	1	1	0	1	0	0	1	0	0	0	0	0	0	0	0	0	0	1	1	0	0	0	0	115	95	102	95	110	1	3	3	65	60
Bacteria;Proteobacteria;Deltaproteobacteria;Desulfuromonadales;Desulfuromonadaceae;Malonomonas;unknown species	OTU_581	0	0	0	1	0	0	0	1	1	0	0	0	0	0	0	0	0	0	1	1	0	0	0	0	0	1	0	0	0	0	1	0	0	0	0	0	0	0	169	191	408	0	6	2	0	0	1	4
Bacteria;Proteobacteria;Deltaproteobacteria;Desulfuromonadales;Geobacteraceae;Geothermobacter;Geothermobacter sp.	OTU_80	0	0	0	3	3	3	2	6	0	0	0	1	2	1	0	4	1	0	2	6	3	2	7	2	3	2	1	0	1	0	1	0	7	2	3	0	1	3	43	73	19	354	197	2	1	3	2136	1774
Bacteria;Proteobacteria;Deltaproteobacteria;Desulfuromonadales;Geobacteraceae;Geothermobacter;Geothermobacter sp.	OTU_992	0	0	0	0	0	1	0	0	0	1	0	0	0	0	0	0	0	0	0	0	0	0	0	0	1	0	0	0	0	0	0	0	0	1	0	0	0	0	32	25	13	46	112	1	0	0	55	40
Bacteria;Proteobacteria;Deltaproteobacteria;Desulfuromonadales;Geobacteraceae;Geothermobacter;unknown species	OTU_938	1	1	0	0	0	0	0	1	0	3	0	0	0	1	0	0	0	1	0	4	0	0	0	0	1	0	0	0	0	0	1	0	1	0	3	0	0	0	90	105	193	1	2	0	1	1	1	2
Bacteria;Proteobacteria;Deltaproteobacteria;Desulfuromonadales;Sva1033;unknown genus;unknown species	OTU_579	0	1	1	1	0	0	0	2	0	0	0	1	0	0	0	0	0	0	1	0	0	0	0	1	1	0	0	0	0	0	0	0	0	760	0	0	0	0	24	23	47	3	1	2	0	1	2	2
Bacteria;Proteobacteria;Deltaproteobacteria;DTB120;unknown family;unknown genus;unknown species	OTU_527	0	0	0	0	0	0	0	0	0	1	0	0	1	1	0	3	0	0	0	0	1	0	0	1	1	0	0	0	0	0	0	0	1	0	0	0	0	1	0	0	1	0	0	0	0	1	50	40
Bacteria;Proteobacteria;Deltaproteobacteria;MBNT15;unknown family;unknown genus;Nitrospirae bacterium CG2_30_70_394	OTU_781	0	0	0	0	0	0	0	0	0	0	0	0	0	1	0	0	0	0	1	0	0	0	0	0	1	0	0	0	0	0	0	0	0	0	0	0	0	0	2	3	0	1	2	0	0	1	46	33
Bacteria;Proteobacteria;Deltaproteobacteria;MBNT15;unknown family;unknown genus;Nitrospirae bacterium CG2_30_70_394	OTU_1074	0	0	0	0	0	0	0	0	0	0	0	0	0	0	0	0	0	0	0	1	0	1	1	0	0	0	0	0	0	0	0	0	0	0	0	0	0	0	0	0	0	0	0	0	0	0	100	126
Bacteria;Proteobacteria;Deltaproteobacteria;MBNT15;unknown family;unknown genus;unknown species	OTU_293	1	0	0	2	0	1	1	0	1	1	1	0	1	1	0	2	0	0	1	0	1	0	1	0	1	1	0	0	0	0	0	0	0	0	0	0	1	0	2	1	1	6	14	1	1	1	580	572
Bacteria;Proteobacteria;Deltaproteobacteria;MBNT15;unknown family;unknown genus;unknown species	OTU_968	0	0	0	0	0	0	0	0	0	0	0	0	1	0	0	0	0	0	0	0	0	0	1	0	1	1	0	0	0	0	0	0	0	0	0	0	0	0	145	89	115	0	0	0	1	0	13	13
Bacteria;Proteobacteria;Deltaproteobacteria;Multi-affiliation;Multi-affiliation;Multi-affiliation;Multi-affiliation	OTU_305	1	0	199	1	0	0	1	809	0	0	333	0	0	0	0	1	0	0	0	1	0	2	314	0	0	0	12	0	0	0	1	0	0	1	1	0	1	0	1	0	1	1	0	14	17	10	0	1
Bacteria;Proteobacteria;Deltaproteobacteria;Myxococcales;BIrii41;unknown genus;unknown species	OTU_510	0	0	0	0	0	0	0	0	1	0	194	0	1	1	0	2	0	1	810	0	0	0	1	0	0	0	0	0	0	0	0	0	0	1	0	0	0	1	0	2	1	0	0	0	1	0	0	3
Bacteria;Proteobacteria;Deltaproteobacteria;Myxococcales;MidBa8;unknown genus;unknown species	OTU_1299	0	0	0	0	0	0	0	0	0	0	9	0	0	0	0	0	0	0	1	0	0	0	1	202	0	0	0	0	0	0	0	0	0	0	0	0	0	1	0	0	0	0	0	5	6	17	0	1
Bacteria;Proteobacteria;Deltaproteobacteria;Myxococcales;Sandaracinaceae;unknown genus;metagenome	OTU_258	0	1	1	1	0	2	1	3	0	0	0	2	3	1	1	0	1	2	0	1	1	1	2	1	1	1	0	0	1	0	1	0	2	1	2	0	0	1	2	1	1	2	0	1	2	3	2	2
Bacteria;Proteobacteria;Deltaproteobacteria;Myxococcales;Sandaracinaceae;unknown genus;metagenome	OTU_816	0	0	0	0	0	1	0	0	0	0	0	0	1	0	515	0	0	0	0	0	0	0	0	0	0	0	0	0	0	0	0	0	0	0	0	0	0	0	0	0	0	0	0	0	0	1	1	0
Bacteria;Proteobacteria;Deltaproteobacteria;Myxococcales;Sandaracinaceae;unknown genus;unknown species	OTU_518	1	1	0	0	0	0	0	1	0	0	0	0	0	0	1	3	1	0	0	0	0	0	0	0	0	0	1	0	0	0	0	0	0	0	0	0	0	0	41	44	55	38	77	0	2	1	229	276
Bacteria;Proteobacteria;Deltaproteobacteria;Myxococcales;Sandaracinaceae;unknown genus;unknown species	OTU_618	0	0	0	1	0	0	0	0	0	0	0	0	0	0	0	0	1	1	1	0	1	0	0	0	778	0	0	0	0	0	0	0	0	0	0	0	0	0	3	2	0	10	19	1	1	0	2	0
Bacteria;Proteobacteria;Deltaproteobacteria;Myxococcales;Sandaracinaceae;unknown genus;unknown species	OTU_870	0	0	0	0	0	1	0	0	0	0	0	0	174	0	0	0	0	0	0	0	0	0	0	0	0	0	0	0	0	0	0	0	0	0	2	0	0	0	52	42	73	9	19	19	16	19	12	9
Bacteria;Proteobacteria;Deltaproteobacteria;Myxococcales;Sandaracinaceae;unknown genus;unknown species	OTU_1334	1	0	0	0	0	0	1	0	0	0	0	0	1	0	0	0	0	0	1	0	0	1	0	0	0	0	0	0	0	0	0	0	0	0	0	0	135	0	19	17	19	5	13	15	13	14	10	13
Bacteria;Proteobacteria;Deltaproteobacteria;Myxococcales;VHS-B3-70;unknown genus;unknown species	OTU_768	1	0	0	0	0	0	0	0	0	1	0	0	0	1	0	0	0	0	0	0	0	1	0	0	2	0	0	0	0	0	0	0	1	0	0	0	337	0	0	7	3	11	24	0	0	1	65	65
Bacteria;Proteobacteria;Deltaproteobacteria;Myxococcales;VHS-B3-70;unknown genus;unknown species	OTU_1274	0	0	0	0	0	0	1	0	0	0	0	0	0	0	0	0	0	0	0	0	0	0	0	0	0	0	0	0	0	0	0	0	0	0	0	0	0	0	0	1	0	62	113	0	0	0	46	38
Bacteria;Proteobacteria;Deltaproteobacteria;NB1-j;unknown family;unknown genus;unknown species	OTU_222	2	0	2	0	0	1	1	0	0	1	0	1	4	0	0	0	1	0	0	0	0	0	2	0	2	0	5	0	0	0	0	0	0	1	2	0	1	0	3	2	0	3	0	0	0	1	36	92
Bacteria;Proteobacteria;Deltaproteobacteria;NB1-j;unknown family;unknown genus;unknown species	OTU_553	1	0	0	1	0	0	0	0	0	1	1	0	0	0	0	1	0	0	0	4	0	1	1	0	0	0	1	0	0	0	0	0	0	0	0	0	0	0	0	0	0	1	1	1	0	0	1	2
Bacteria;Proteobacteria;Deltaproteobacteria;NB1-j;unknown family;unknown genus;unknown species	OTU_875	0	0	0	0	0	0	0	0	0	0	0	0	0	0	0	0	0	0	0	0	0	0	2	0	2	0	0	0	0	0	0	0	0	0	0	0	0	0	23	32	6	2	10	0	1	0	136	150
Bacteria;Proteobacteria;Deltaproteobacteria;NB1-j;unknown family;unknown genus;unknown species	OTU_1226	0	0	0	0	0	0	0	0	0	0	0	1	1	0	0	0	0	0	0	0	0	0	0	0	0	0	0	0	0	0	1	0	0	0	0	0	0	0	6	16	13	12	12	15	18	9	62	71
Bacteria;Proteobacteria;Deltaproteobacteria;Oligoflexales;0319-6G20;unknown genus;metagenome	OTU_783	0	0	0	1	0	0	0	0	0	0	0	0	0	0	0	1	0	0	0	1	0	0	0	0	0	0	0	0	0	0	0	0	2	1	0	0	1	0	0	1	1	0	1	0	0	0	0	1
Bacteria;Proteobacteria;Deltaproteobacteria;Oligoflexales;Oligoflexaceae;unknown genus;unknown species	OTU_444	0	0	1	1	0	0	0	0	0	0	0	0	0	0	0	0	0	0	1	0	1	1235	0	0	0	0	0	0	0	0	0	0	0	1	0	0	0	1	1	3	1	0	0	0	0	1	0	0
Bacteria;Proteobacteria;Deltaproteobacteria;PB19;unknown family;unknown genus;marine metagenome	OTU_394	1	1	0	2	0	1	0	0	0	0	1	0	2	0	0	1	1	1	0	0	0	2	0	0	1	0	3	0	0	0	0	0	2	0	0	0	0	1	1	0	0	1	1	1	0	1	1	1
Bacteria;Proteobacteria;Deltaproteobacteria;PB19;unknown family;unknown genus;unknown species	OTU_488	0	0	0	0	0	0	0	1	0	0	1	0	2	0	1	0	0	0	0	0	0	765	0	0	253	0	0	0	1	0	0	0	148	0	1	0	0	0	3	3	0	30	29	26	35	21	46	49
Bacteria;Proteobacteria;Deltaproteobacteria;PB19;unknown family;unknown genus;unknown species	OTU_950	0	1	0	0	0	0	1	0	0	0	0	0	0	0	0	0	0	0	0	1	0	1	408	0	0	0	0	0	0	0	0	0	0	1	0	0	1	0	0	1	0	1	0	1	1	2	0	0
Bacteria;Proteobacteria;Deltaproteobacteria;SAR324 clade(Marine group B);unknown family;unknown genus;unknown species	OTU_633	1	0	0	0	0	0	1	0	0	0	1	0	1	0	0	1	0	0	0	0	0	0	0	0	0	0	0	0	0	0	0	0	1	0	0	0	0	0	0	0	1	0	0	2	0	1	0	2
Bacteria;Proteobacteria;Deltaproteobacteria;SAR324 clade(Marine group B);unknown family;unknown genus;unknown species	OTU_655	0	0	0	0	1	0	0	0	0	0	667	0	0	0	0	1	0	0	0	0	0	0	0	0	1	0	0	0	0	0	0	0	0	0	0	0	0	1	0	0	1	0	3	6	10	15	0	0
Bacteria;Proteobacteria;Deltaproteobacteria;SAR324 clade(Marine group B);unknown family;unknown genus;unknown species	OTU_720	0	1	0	0	0	0	0	2	0	0	0	0	0	0	0	0	0	599	0	0	0	0	0	0	0	0	0	0	0	0	0	0	1	0	0	0	0	1	0	0	0	0	0	1	1	0	0	0
Bacteria;Proteobacteria;Deltaproteobacteria;SAR324 clade(Marine group B);unknown family;unknown genus;unknown species	OTU_973	0	0	0	0	0	0	0	0	0	0	0	0	1	0	0	0	0	0	0	0	0	0	0	0	0	0	0	0	0	0	0	0	0	0	1	0	1	0	0	0	0	0	0	0	1	0	0	0
Bacteria;Proteobacteria;Deltaproteobacteria;SAR324 clade(Marine group B);unknown family;unknown genus;unknown species	OTU_1130	1	0	0	0	0	0	0	0	0	0	1	0	0	0	0	0	0	0	0	0	0	0	0	0	0	1	0	0	0	0	0	0	0	0	0	0	0	0	0	0	0	0	2	0	1	0	110	106
Bacteria;Proteobacteria;Deltaproteobacteria;Sva0485;unknown family;unknown genus;unknown species	OTU_760	0	0	0	0	0	1	3	0	0	0	0	0	1	0	0	0	0	0	1	1	0	0	599	0	0	0	1	0	0	0	0	0	0	0	0	0	0	0	0	0	0	1	0	2	6	1	0	0
Bacteria;Proteobacteria;Deltaproteobacteria;Sva0485;unknown family;unknown genus;unknown species	OTU_881	0	0	0	1	0	0	0	0	0	0	0	1	0	0	0	0	0	0	1	0	0	485	0	1	1	0	0	0	0	0	1	0	2	0	0	0	0	0	0	0	0	1	0	0	1	1	1	0
Bacteria;Proteobacteria;Deltaproteobacteria;Sva0485;unknown family;unknown genus;unknown species	OTU_904	0	0	1	0	0	0	0	0	0	0	1	1	0	0	0	1	0	0	0	0	0	0	0	0	0	0	1	0	0	0	0	0	1	0	0	0	0	0	0	0	0	0	1	1	0	0	0	0
Bacteria;Proteobacteria;Deltaproteobacteria;Syntrophobacterales;Syntrophobacteraceae;Desulfacinum;Desulfacinum sp.	OTU_369	0	1	0	0	1	0	1	2	0	2	1	0	0	0	0	0	0	0	1	1	1	0	0	0	2	1	0	0	0	0	1	0	0	0	1	0	308	0	10	18	1	134	85	0	0	1	314	302
Bacteria;Proteobacteria;Deltaproteobacteria;Syntrophobacterales;Syntrophobacteraceae;Desulfacinum;Desulfacinum sp.	OTU_1133	0	0	0	0	0	1	0	0	0	0	0	0	0	1	0	0	1	0	0	0	1	0	0	1	0	0	0	0	0	0	0	0	0	0	0	0	0	0	30	36	18	35	28	0	1	0	48	42
Bacteria;Proteobacteria;Deltaproteobacteria;Thermodesulfobacteriales;Thermodesulfobacteriaceae;Thermosulfurimonas;Thermosulfurimonas dismutans	OTU_153	3	0	0	1	0	0	0	0	0	0	1	1	2	0	1	2	1	0	1	1	1	1	1	0	4	1	2	0	1	0	1	0	3	0	2	0	1	1	1	2	2	2976	118	2	0	2	3	5
Bacteria;Proteobacteria;Gammaproteobacteria;Alteromonadales;Alteromonadaceae;Aestuariibacter;unknown species	OTU_1033	0	0	0	0	0	0	305	0	1	0	0	1	0	0	0	0	0	0	0	0	0	0	0	0	1	1	0	0	0	0	0	0	37	0	0	0	0	0	1	1	2	0	0	0	0	1	0	1
Bacteria;Proteobacteria;Gammaproteobacteria;Alteromonadales;Alteromonadaceae;Aestuariibacter;unknown species	OTU_1400	0	0	1	0	0	0	1	2	209	0	0	1	0	0	0	0	0	0	0	0	2	0	0	1	0	0	0	0	1	0	0	0	0	0	0	0	72	0	1	0	0	0	0	0	0	0	0	0
Bacteria;Proteobacteria;Gammaproteobacteria;Alteromonadales;Alteromonadaceae;Glaciecola;Multi-affiliation	OTU_208	1	2	1	2	0	3	1	3	1	1	0	1	0	0	0	2	1	1	0	1	1	2	0	0	2	2	0	0	0	0	1	0	1025	0	0	0	1	346	0	3	0	3	2	0	2	2	3	6
Bacteria;Proteobacteria;Gammaproteobacteria;Alteromonadales;Alteromonadaceae;Multi-affiliation;Multi-affiliation	OTU_106	2	1	0	1	1	4	323	50	530	3	153	377	3	0	4	206	408	546	2	511	4	3	4	2	4	2	1	0	3	0	5	290	1896	0	1	0	3	1	3	4	1	4	2	1	3	4	2	1
Bacteria;Proteobacteria;Gammaproteobacteria;Alteromonadales;Alteromonadaceae;Multi-affiliation;Multi-affiliation	OTU_1318	0	0	0	1	0	0	1	0	0	0	0	0	0	0	0	0	0	0	0	0	0	0	0	0	0	229	0	0	0	0	0	0	1	0	0	0	1	0	0	1	1	0	0	1	5	0	1	0
Bacteria;Proteobacteria;Gammaproteobacteria;Alteromonadales;Colwelliaceae;Colwellia;Multi-affiliation	OTU_915	0	0	0	0	0	0	0	1	0	0	0	0	0	0	0	0	0	0	0	0	0	0	89	0	1	0	0	0	0	0	1	0	1	0	0	0	0	0	2	1	0	22	42	0	0	0	20	9
Bacteria;Proteobacteria;Gammaproteobacteria;Alteromonadales;Colwelliaceae;Colwellia;unknown species	OTU_20	0	0	2	0	0	0	1	2	1	0	0	0	0	0	1	0	0	0	1	1	0	1	0	2	0	0	345	27487	0	5	0	5	313	0	0	3	2	0	0	0	0	6	27	0	1	1	8	2
Bacteria;Proteobacteria;Gammaproteobacteria;Alteromonadales;Colwelliaceae;Colwellia;unknown species	OTU_316	0	0	0	0	0	0	0	0	0	0	0	0	0	0	0	0	0	0	0	0	0	0	0	0	0	0	0	1610	0	2	0	0	26	0	0	1	0	0	0	0	0	0	1	2	0	1	0	0
Bacteria;Proteobacteria;Gammaproteobacteria;Alteromonadales;Colwelliaceae;Colwellia;unknown species	OTU_1140	0	0	0	0	0	0	0	0	0	0	0	0	0	0	0	0	0	0	0	1	0	0	0	0	0	0	0	0	0	0	0	0	207	0	0	0	1	0	0	1	0	24	56	2	0	0	1	4
Bacteria;Proteobacteria;Gammaproteobacteria;Alteromonadales;Colwelliaceae;Colwellia;unknown species	OTU_1309	0	0	1	0	0	1	0	0	0	0	0	1	0	0	0	0	0	0	0	0	0	0	0	0	1	0	0	0	0	0	0	0	247	0	0	0	0	1	1	0	0	0	0	0	1	0	0	0
Bacteria;Proteobacteria;Gammaproteobacteria;Alteromonadales;Colwelliaceae;Multi-affiliation;Multi-affiliation	OTU_2271	0	0	0	0	0	0	0	0	0	0	0	0	0	0	0	1	0	0	0	1	0	0	0	0	1	0	0	0	0	0	0	0	66	0	0	0	0	0	60	63	63	1	3	0	1	0	0	0
Bacteria;Proteobacteria;Gammaproteobacteria;Alteromonadales;Colwelliaceae;Thalassotalea;Multi-affiliation	OTU_974	0	1	0	1	0	3	232	0	0	0	0	1	0	1	1	0	1	0	0	0	1	0	0	0	1	0	0	0	0	0	0	0	552	0	0	0	0	1	0	0	0	0	0	0	1	0	0	2
Bacteria;Proteobacteria;Gammaproteobacteria;Alteromonadales;Colwelliaceae;Thalassotalea;Thalassomonas sp.	OTU_583	1	0	1	1	0	0	0	1	0	1	0	699	1	0	0	0	1	1	1	1	0	0	0	0	0	1	0	0	1	0	0	0	143	0	0	0	1	0	3	0	0	0	0	1	0	0	1	1
Bacteria;Proteobacteria;Gammaproteobacteria;Alteromonadales;Colwelliaceae;Thalassotalea;Thalassotalea agarivorans	OTU_898	0	0	2	1	0	0	429	0	0	0	0	1	0	0	0	0	1	0	0	0	0	1	0	0	0	1	0	0	0	0	0	0	33	0	0	0	0	0	0	0	0	1	1	0	0	0	0	0
Bacteria;Proteobacteria;Gammaproteobacteria;Alteromonadales;Colwelliaceae;Thalassotalea;Thalassotalea eurytherma	OTU_207	0	0	0	5	1	0	1	3	1	1	0	1	2	0	1	1	171	0	2	1	2	1	2	0	2	1	0	0	0	0	0	0	1896	0	0	0	196	187	7	10	3	2	1	3	7	3	3	5
Bacteria;Proteobacteria;Gammaproteobacteria;Alteromonadales;Colwelliaceae;Thalassotalea;Thalassotalea ponticola	OTU_1524	0	0	0	0	0	0	0	0	0	0	0	0	0	1	0	1	0	0	0	0	0	0	0	0	0	0	0	0	0	0	0	0	0	0	0	0	0	0	7	11	7	7	21	8	3	4	58	50
Bacteria;Proteobacteria;Gammaproteobacteria;Alteromonadales;Colwelliaceae;Thalassotalea;Thalassotalea sediminis	OTU_962	1	0	0	0	0	0	0	0	0	0	0	0	0	0	0	0	0	0	0	0	0	0	0	0	0	0	0	0	0	0	0	0	386	0	0	0	0	0	0	0	0	3	11	3	0	5	1	1
Bacteria;Proteobacteria;Gammaproteobacteria;Alteromonadales;Colwelliaceae;unknown genus;Thalassomonas sp.	OTU_319	1	1	1	1	0	0	1	3	0	3	2	1	1	1	0	1	1	0	4	1	2	0	1	1	1	2	0	0	0	0	1	0	348	0	1214	0	125	2	4	4	5	0	3	0	1	4	2	3
Bacteria;Proteobacteria;Gammaproteobacteria;Alteromonadales;Marinobacteraceae;Marinobacter;Marinobacter similis	OTU_1173	0	1	0	0	0	0	0	0	0	0	0	0	0	0	0	0	288	0	0	0	0	0	0	0	0	0	0	0	0	0	0	0	0	0	1	0	0	0	0	0	0	0	0	1	0	0	0	1
Bacteria;Proteobacteria;Gammaproteobacteria;Alteromonadales;Marinobacteraceae;Marinobacter;Multi-affiliation	OTU_1285	0	0	0	0	0	1	0	183	0	1	0	0	0	0	0	0	0	0	0	0	0	0	0	0	0	0	0	0	0	0	0	0	110	0	0	0	0	0	0	0	0	0	0	0	0	0	0	0
Bacteria;Proteobacteria;Gammaproteobacteria;Alteromonadales;Moritellaceae;unknown genus;Gallaecimonas sp.	OTU_338	0	0	1	0	2	2	0	2	0	1573	0	1	1	0	0	1	1	0	0	1	0	0	2	0	0	0	0	0	0	0	1	0	0	2	0	0	0	0	0	0	0	3	0	0	1	3	2	2
Bacteria;Proteobacteria;Gammaproteobacteria;Alteromonadales;Pseudoalteromonadaceae;Algicola;unknown species	OTU_1020	0	0	0	0	0	0	0	0	0	0	0	1	0	0	0	0	0	0	0	0	0	0	1	0	0	1	0	0	0	0	1	0	371	0	1	0	1	0	0	1	0	1	0	2	1	0	0	1
Bacteria;Proteobacteria;Gammaproteobacteria;Alteromonadales;Pseudoalteromonadaceae;Pseudoalteromonas;Multi-affiliation	OTU_233	1	0	0	0	0	2	0	93	0	0	0	0	0	1	0	1	0	0	0	0	0	1	0	0	0	0	0	4	1	1145	0	1	806	0	0	0	0	0	0	0	1	0	0	1	1	2	0	0
Bacteria;Proteobacteria;Gammaproteobacteria;Alteromonadales;Pseudoalteromonadaceae;Pseudoalteromonas;Multi-affiliation	OTU_334	0	0	0	0	0	0	0	1	0	0	65	0	0	0	1	0	0	367	0	0	0	0	1	0	0	0	0	996	0	0	0	1	20	0	0	0	83	0	0	0	0	0	1	0	0	0	0	1
Bacteria;Proteobacteria;Gammaproteobacteria;Alteromonadales;Pseudoalteromonadaceae;Pseudoalteromonas;Multi-affiliation	OTU_428	0	0	0	1	0	1	0	0	0	0	1	0	0	0	1	1	0	0	1	2	0	1	2	0	0	0	0	0	1	0	0	0	0	1	0	0	1288	0	0	1	2	1	0	0	0	0	2	1
Bacteria;Proteobacteria;Gammaproteobacteria;Alteromonadales;Pseudoalteromonadaceae;Pseudoalteromonas;Multi-affiliation	OTU_650	1	0	0	0	0	0	1	1	0	1	1	0	0	1	0	0	0	0	0	1	0	0	0	0	0	0	0	0	1	0	1	0	286	0	2	0	56	1	10	0	1	1	2	0	1	0	5	0
Bacteria;Proteobacteria;Gammaproteobacteria;Alteromonadales;Pseudoalteromonadaceae;Pseudoalteromonas;Multi-affiliation	OTU_905	0	1	0	0	0	0	0	0	0	0	0	0	0	0	0	59	0	0	0	0	0	0	0	0	0	0	0	52	0	137	0	21	134	0	0	22	0	0	0	1	0	0	0	0	0	0	0	0
Bacteria;Proteobacteria;Gammaproteobacteria;Alteromonadales;Psychromonadaceae;Agarivorans;Multi-affiliation	OTU_493	1	244	0	1	0	1	0	0	0	0	0	0	0	0	0	1	1	0	0	0	0	0	1	1	0	1	0	0	34	0	0	0	865	1	1	0	0	0	1	1	1	2	3	1	2	1	1	1
Bacteria;Proteobacteria;Gammaproteobacteria;Alteromonadales;Shewanellaceae;Ferrimonas;Ferrimonadaceae bacterium 1tb6	OTU_682	0	0	1	0	1	1	1	0	1	0	0	0	1	0	0	1	0	0	1	0	1	0	0	1	1	0	0	0	0	0	0	0	0	0	0	0	0	2	184	211	207	2	13	1	1	3	1	0
Bacteria;Proteobacteria;Gammaproteobacteria;Alteromonadales;Shewanellaceae;Psychrobium;unknown species	OTU_492	3	0	0	2	0	2	0	1	684	0	0	0	2	1	0	0	0	0	0	4	0	2	0	1	0	0	0	0	0	0	0	0	246	1	1	0	163	0	1	0	0	1	0	0	1	2	0	1
Bacteria;Proteobacteria;Gammaproteobacteria;Alteromonadales;Shewanellaceae;Psychrobium;unknown species	OTU_1303	0	0	0	0	0	0	1	1	244	0	0	0	0	0	0	0	0	0	0	0	0	0	0	0	0	0	0	0	0	0	0	0	0	0	0	0	1	0	0	0	1	0	0	1	0	1	1	0
Bacteria;Proteobacteria;Gammaproteobacteria;Alteromonadales;Shewanellaceae;Shewanella;Multi-affiliation	OTU_923	0	0	0	0	0	0	0	1	1	1	296	0	2	0	0	0	0	0	0	0	1	0	0	1	2	0	0	0	1	0	1	0	1	0	1	0	0	0	0	0	0	1	5	1	9	6	1	2
Bacteria;Proteobacteria;Gammaproteobacteria;Alteromonadales;Shewanellaceae;Shewanella;Multi-affiliation	OTU_1153	0	0	1	0	0	0	0	0	0	0	0	0	0	0	0	0	0	0	0	0	0	0	0	1	0	306	0	0	0	0	1	0	0	0	1	0	0	0	1	0	0	0	1	0	0	1	0	0
Bacteria;Proteobacteria;Gammaproteobacteria;Alteromonadales;Shewanellaceae;Shewanella;Multi-affiliation	OTU_1188	0	0	0	0	0	1	0	0	0	0	176	0	1	0	0	0	0	0	0	0	0	0	1	0	1	0	0	0	0	0	1	0	41	0	0	0	1	0	0	0	0	3	10	4	3	3	7	20
Bacteria;Proteobacteria;Gammaproteobacteria;Alteromonadales;Shewanellaceae;Shewanella;Multi-affiliation	OTU_1484	0	0	0	0	0	1	0	0	0	0	199	0	0	0	0	1	0	0	0	0	0	0	0	0	1	0	0	0	0	0	0	0	43	0	0	0	0	0	0	0	0	1	0	0	2	0	3	0
Bacteria;Proteobacteria;Gammaproteobacteria;Alteromonadales;Shewanellaceae;Shewanella;unknown species	OTU_624	0	0	0	0	1	0	0	0	0	0	688	1	0	0	0	1	0	0	0	0	0	0	0	0	2	2	1	0	1	0	0	0	0	1	1	0	0	0	0	0	0	5	32	0	1	0	2	0
Bacteria;Proteobacteria;Gammaproteobacteria;Arenicellales;Arenicellaceae;Thiolapillus;Alviniconcha hessleri gill endosymbiont	OTU_1088	0	0	0	0	0	0	0	1	0	0	0	0	0	0	0	0	0	0	0	0	0	0	0	0	2	0	0	0	0	0	0	0	0	0	0	0	0	0	12	7	12	169	85	0	0	0	7	18
Bacteria;Proteobacteria;Gammaproteobacteria;Arenicellales;Arenicellaceae;Thiolapillus;Ifremeria nautilei gill symbiont	OTU_274	0	0	1	1	1	0	0	1	0	0	0	1	0	0	2	0	0	0	1	2	0	0	0	184	0	0	0	0	1	0	1	0	0	0	2	0	1	0	5	12	7	21	28	544	547	483	4	3
Bacteria;Proteobacteria;Gammaproteobacteria;Arenicellales;Arenicellaceae;unknown genus;unknown species	OTU_200	1	0	1	2	1	1	0	1	1	1	1	0	0	0	1	0	0	1	1	1	3	0	1	263	1	0	0	0	0	0	2	0	1	1	0	0	2	0	1	1	0	1	1	706	705	659	1	2
Bacteria;Proteobacteria;Gammaproteobacteria;Arenicellales;Arenicellaceae;unknown genus;unknown species	OTU_269	1	3	1	0	1	1	2	292	0	0	0	0	0	0	0	1	1	1	3	2	2	2	361	1	3	1	0	0	2	0	0	0	3	0	1	0	0	0	3	5	4	42	22	565	682	514	21	25
Bacteria;Proteobacteria;Gammaproteobacteria;Arenicellales;Arenicellaceae;unknown genus;unknown species	OTU_694	0	0	0	0	0	0	0	0	0	0	2	0	0	0	0	0	1	0	0	1	0	1	202	0	0	0	0	0	0	0	0	0	0	0	2	0	0	0	0	0	0	0	0	150	169	132	1	0
Bacteria;Proteobacteria;Gammaproteobacteria;Arenicellales;Arenicellaceae;unknown genus;unknown species	OTU_1307	0	0	0	0	0	0	1	0	0	0	1	1	1	0	0	0	0	0	0	0	0	0	0	0	1	0	0	0	0	0	2	0	0	0	0	0	0	0	1	0	0	0	1	0	0	0	0	0
Bacteria;Proteobacteria;Gammaproteobacteria;B2M28;unknown family;unknown genus;unknown species	OTU_994	0	0	329	0	0	0	0	0	0	0	0	0	0	0	0	0	0	0	0	0	0	0	1	0	0	0	13	0	0	0	1	0	0	0	0	0	0	0	13	6	7	2	8	16	11	14	1	4
Bacteria;Proteobacteria;Gammaproteobacteria;B2M28;unknown family;unknown genus;unknown species	OTU_1171	0	1	0	1	0	0	0	0	0	0	0	2	0	0	0	196	0	0	0	0	0	0	0	0	0	0	1	0	0	0	0	0	0	1	0	0	0	0	24	13	27	2	8	3	0	2	5	1
Bacteria;Proteobacteria;Gammaproteobacteria;B2M28;unknown family;unknown genus;unknown species	OTU_1375	1	0	0	0	1	0	0	1	0	0	0	0	0	0	0	0	0	0	0	0	0	0	1	0	0	0	1	0	0	0	0	0	0	0	0	0	0	1	105	79	116	13	20	17	17	15	3	5
Bacteria;Proteobacteria;Gammaproteobacteria;Betaproteobacteriales;Burkholderiaceae;Brachymonas;unknown species	OTU_998	0	0	0	0	0	0	0	0	0	0	0	0	0	0	0	0	0	0	0	0	0	0	0	0	0	0	0	1	0	0	0	347	0	0	0	1	0	0	0	0	0	0	0	0	0	0	0	0
Bacteria;Proteobacteria;Gammaproteobacteria;Betaproteobacteriales;Burkholderiaceae;Burkholderia-Caballeronia-Paraburkholderia;Multi-affiliation	OTU_525	0	0	0	1	0	1	1	0	0	0	0	0	0	0	0	1	0	0	1	1	0	1	0	0	0	0	0	0	0	0	0	0	2	0	0	0	2	0	1	0	0	0	0	1	1	0	0	3
Bacteria;Proteobacteria;Gammaproteobacteria;Betaproteobacteriales;Burkholderiaceae;Burkholderia-Caballeronia-Paraburkholderia;Multi-affiliation	OTU_593	1	0	0	1	0	861	1	0	0	0	2	0	0	0	0	0	0	0	1	1	1	0	0	0	0	0	0	0	0	0	1	0	0	0	0	0	0	0	0	0	0	0	0	1	1	2	0	0
Bacteria;Proteobacteria;Gammaproteobacteria;Betaproteobacteriales;Burkholderiaceae;Burkholderia-Caballeronia-Paraburkholderia;Multi-affiliation	OTU_759	1	0	0	0	0	0	1	0	0	0	0	1	0	1	0	0	0	0	0	0	1	0	2	0	3	1	0	0	0	0	0	0	0	0	0	0	0	0	1	0	0	0	0	0	1	0	0	0
Bacteria;Proteobacteria;Gammaproteobacteria;Betaproteobacteriales;Burkholderiaceae;Burkholderia-Caballeronia-Paraburkholderia;Multi-affiliation	OTU_1422	0	0	0	0	1	0	0	0	0	0	0	0	2	0	0	0	0	1	0	1	0	0	0	0	0	0	0	0	0	0	1	0	0	1	1	0	0	1	2	0	1	1	0	1	0	0	0	1
Bacteria;Proteobacteria;Gammaproteobacteria;Betaproteobacteriales;Burkholderiaceae;Castellaniella;unidentified bacterium	OTU_3	43	3740	1420	12833	11	42	16186	5209	13	42	17	26	22	18	16	31	23	16	19204	9740	12631	36	3437	451	85	34	69	0	31	0	37	0	35	16	35	0	45	16	28	35	38	59	34	36	32	47	32	44
Bacteria;Proteobacteria;Gammaproteobacteria;Betaproteobacteriales;Burkholderiaceae;Comamonas;Multi-affiliation	OTU_1180	1	0	1	0	0	0	0	0	0	0	289	0	0	0	0	0	0	1	0	0	0	0	0	1	0	0	0	0	0	0	0	0	1	0	0	0	0	0	0	0	0	1	0	0	0	0	0	0
Bacteria;Proteobacteria;Gammaproteobacteria;Betaproteobacteriales;Burkholderiaceae;Curvibacter;Multi-affiliation	OTU_340	2	2	0	1	0	0	1	2	0	0	1	0	0	2	0	0	0	1	3	0	1	1	0	0	3	0	0	0	1603	0	1	0	0	0	1	0	3	0	0	1	1	1	2	1	1	0	1	0
Bacteria;Proteobacteria;Gammaproteobacteria;Betaproteobacteriales;Burkholderiaceae;Duganella;unknown species	OTU_1200	0	0	0	0	0	0	0	0	0	0	0	0	0	0	0	0	0	0	0	0	0	0	0	0	0	0	0	0	0	258	0	0	0	0	0	0	0	0	0	0	0	0	0	0	0	0	0	0
Bacteria;Proteobacteria;Gammaproteobacteria;Betaproteobacteriales;Burkholderiaceae;Hydrogenophaga;Multi-affiliation	OTU_1025	0	0	0	0	0	0	0	0	0	0	0	0	0	0	0	0	0	0	0	0	0	0	0	0	0	0	0	0	0	0	0	331	0	0	0	0	0	0	0	0	0	0	0	0	0	0	0	0
Bacteria;Proteobacteria;Gammaproteobacteria;Betaproteobacteriales;Burkholderiaceae;Limnobacter;unknown species	OTU_1246	0	0	0	0	0	0	0	0	0	0	0	0	0	0	0	0	0	0	0	0	0	268	0	0	1	0	0	0	0	0	0	0	0	0	0	0	0	0	0	0	0	0	0	0	0	0	0	0
Bacteria;Proteobacteria;Gammaproteobacteria;Betaproteobacteriales;Burkholderiaceae;Massilia;Multi-affiliation	OTU_596	0	1	0	0	0	0	1	0	1	0	0	0	0	0	0	0	0	0	0	0	0	1015	0	0	0	0	0	0	0	0	0	0	0	0	0	0	2	0	0	0	1	0	0	0	0	0	1	0
Bacteria;Proteobacteria;Gammaproteobacteria;Betaproteobacteriales;Burkholderiaceae;Massilia;Multi-affiliation	OTU_1066	0	0	0	0	1	0	0	0	0	0	0	0	0	0	0	0	0	0	0	0	0	356	0	1	0	1	0	0	0	0	0	0	0	0	1	0	0	0	0	0	0	0	0	0	0	0	0	0
Bacteria;Proteobacteria;Gammaproteobacteria;Betaproteobacteriales;Burkholderiaceae;Multi-affiliation;Multi-affiliation	OTU_69	6	214	1	122	613	951	227	3	1	1	2	0	72	269	0	2	0	3	4	3	7	2	2	1	11	530	2	279	2	2	2227	0	4	3	1557	0	3	4	6	7	5	0	2	3	1	2	2	2
Bacteria;Proteobacteria;Gammaproteobacteria;Betaproteobacteriales;Burkholderiaceae;Multi-affiliation;Multi-affiliation	OTU_486	1	33	0	23	1	0	2	1	179	0	0	0	0	1	240	0	1	0	1	2	0	1	0	0	3	1	1	1	2	0	2	1	0	191	0	0	0	1	1	2	0	0	0	0	0	2	2	1
Bacteria;Proteobacteria;Gammaproteobacteria;Betaproteobacteriales;Burkholderiaceae;Multi-affiliation;Multi-affiliation	OTU_830	0	0	0	0	0	0	1	0	0	0	0	0	0	0	0	0	0	0	0	0	1	0	0	0	0	0	0	0	0	0	0	0	0	0	1	0	0	0	5	1	0	0	0	0	0	0	0	1
Bacteria;Proteobacteria;Gammaproteobacteria;Betaproteobacteriales;Burkholderiaceae;Ottowia;Multi-affiliation	OTU_1107	0	0	0	0	0	0	0	0	0	0	0	0	0	0	0	0	0	0	0	0	0	0	0	0	0	0	0	0	0	0	0	0	0	0	0	273	0	0	0	0	0	0	0	0	0	0	0	0
Bacteria;Proteobacteria;Gammaproteobacteria;Betaproteobacteriales;Burkholderiaceae;Ralstonia;Multi-affiliation	OTU_262	0	1	0	1	1	0	6	38	1	2	1	0	0	1	1	0	1	1	2	2	727	2	0	103	1	1	2	0	0	0	0	0	2	679	3	0	0	0	0	1	2	1	0	2	0	0	0	1
Bacteria;Proteobacteria;Gammaproteobacteria;Betaproteobacteriales;Burkholderiaceae;Ralstonia;Multi-affiliation	OTU_1222	0	0	2	0	0	0	0	0	0	0	0	0	0	0	0	1	0	0	0	0	0	0	1	0	0	0	271	0	0	0	1	0	0	0	0	0	0	0	0	0	1	0	0	0	1	0	0	0
Bacteria;Proteobacteria;Gammaproteobacteria;Betaproteobacteriales;Burkholderiaceae;Roseateles;Multi-affiliation	OTU_872	0	0	0	0	0	1	0	0	0	0	0	0	0	0	0	0	0	1	0	0	0	0	1	0	1	0	0	0	0	0	0	0	0	0	0	0	0	1	1	0	0	1	1	0	0	0	1	0
Bacteria;Proteobacteria;Gammaproteobacteria;Betaproteobacteriales;Burkholderiaceae;Tepidicella;unknown species	OTU_1314	0	0	0	0	0	0	1	0	1	1	0	0	0	0	0	0	0	0	0	0	264	0	0	0	1	0	0	0	0	0	0	0	0	0	0	0	0	0	0	1	0	0	0	0	0	0	0	0
Bacteria;Proteobacteria;Gammaproteobacteria;Betaproteobacteriales;Burkholderiaceae;Undibacterium;Multi-affiliation	OTU_356	738	0	1	1	1	0	0	2	0	0	0	0	0	0	0	0	0	0	2	0	1	1	1	1	1	0	0	0	0	0	1	0	1	1	0	0	0	785	1	0	0	1	1	1	0	0	0	0
Bacteria;Proteobacteria;Gammaproteobacteria;Betaproteobacteriales;Hydrogenophilaceae;unknown genus;unknown species	OTU_136	2	0	1	1	0	3	3	0	1	2	0	0	0	1	1	0	0	1	2	1	3	2	1	0	2	0	2	0	1	0	4	0	1	0	0	0	3	0	11	40	56	2543	757	3	2	3	0	2
Bacteria;Proteobacteria;Gammaproteobacteria;Betaproteobacteriales;Methylophilaceae;Methylotenera;unknown species	OTU_1006	0	0	0	0	0	0	0	0	0	0	0	0	0	0	0	0	0	0	0	0	0	0	0	0	0	0	0	1	0	0	0	347	0	0	0	0	0	0	0	0	0	0	0	0	0	0	0	0
Bacteria;Proteobacteria;Gammaproteobacteria;Betaproteobacteriales;Methylophilaceae;OM43 clade;Methylophilaceae bacterium NB0095	OTU_792	0	0	1	1	0	0	0	0	0	0	0	0	0	0	0	0	1	0	0	0	0	0	0	0	0	0	0	0	0	0	2	0	0	0	0	0	0	0	0	0	0	0	1	0	1	0	0	1
Bacteria;Proteobacteria;Gammaproteobacteria;Betaproteobacteriales;Neisseriaceae;Neisseria;Multi-affiliation	OTU_1267	0	261	0	0	0	0	0	1	0	1	1	0	0	0	1	0	0	0	0	0	0	0	0	0	0	0	0	0	0	0	0	0	1	0	1	0	0	0	0	1	0	1	0	0	0	0	0	1
Bacteria;Proteobacteria;Gammaproteobacteria;Betaproteobacteriales;Neisseriaceae;unknown genus;unknown species	OTU_22	5	1508	2317	2014	5	10	968	11	266	8	6	5	7	1316	3	346	5	5	2694	43	9	4	4	635	17	4	86	53	3	5938	10	5419	81	6	1725	1465	9	3	25	7	5	10	3	5	10	10	7	12
Bacteria;Proteobacteria;Gammaproteobacteria;Betaproteobacteriales;Nitrosomonadaceae;IS-44;unknown species	OTU_1306	0	1	0	1	0	0	0	0	0	0	0	0	0	0	0	0	0	0	0	0	0	0	0	1	0	0	0	0	1	0	0	0	0	0	0	0	0	0	0	0	1	0	1	0	0	0	0	0
Bacteria;Proteobacteria;Gammaproteobacteria;Betaproteobacteriales;Nitrosomonadaceae;Nitrosomonas;unknown species	OTU_418	1	1	1	1	0	0	1	0	0	1	1	1	0	0	0	0	1	0	1	1	2	0	0	1	1	1	0	0	1	0	2	0	1	0	1	0	0	1	54	114	34	336	353	2	3	1	128	104
Bacteria;Proteobacteria;Gammaproteobacteria;Betaproteobacteriales;Rhodocyclaceae;Dechloromonas;Multi-affiliation	OTU_536	0	0	0	0	0	0	2	0	0	1	0	0	0	0	0	0	0	0	1	0	944	0	1	0	1	1	1	0	0	0	0	0	0	0	0	0	0	0	0	0	0	1	2	0	0	0	0	0
Bacteria;Proteobacteria;Gammaproteobacteria;Betaproteobacteriales;Rhodocyclaceae;Methyloversatilis;Multi-affiliation	OTU_627	0	0	0	0	0	0	0	0	1	0	0	0	0	0	0	1	0	0	1	2	0	1	0	204	0	0	1	0	0	0	0	0	0	0	0	0	0	561	0	0	0	0	0	1	0	0	1	0
Bacteria;Proteobacteria;Gammaproteobacteria;Betaproteobacteriales;SC-I-84;unknown genus;unknown species	OTU_845	0	0	0	0	1	0	0	0	0	1	0	1	0	0	0	0	0	0	0	1	0	0	1	0	2	0	0	0	0	0	0	0	0	0	1	0	0	0	0	0	0	0	0	0	0	0	0	0
Bacteria;Proteobacteria;Gammaproteobacteria;Betaproteobacteriales;Sulfuricellaceae;Sulfurirhabdus;unknown species	OTU_169	3	0	1	1	0	1	2	1	0	0	2	0	1	2	0	2	2	0	1	2	8	0	1	1	2	1	2	0	0	0	0	0	2	1	0	0	1	2	324	536	633	873	345	2	2	0	1	2
Bacteria;Proteobacteria;Gammaproteobacteria;Cellvibrionales;Halieaceae;Halioglobus;unknown species	OTU_753	0	0	0	0	0	0	0	1	0	0	0	1	0	0	0	0	0	0	1	0	0	0	0	0	0	0	0	0	0	0	0	0	0	0	0	0	0	565	0	0	1	2	2	1	0	1	3	2
Bacteria;Proteobacteria;Gammaproteobacteria;Cellvibrionales;Halieaceae;Halioglobus;unknown species	OTU_1169	0	0	1	0	0	0	0	0	0	1	0	0	0	0	0	0	0	1	0	0	0	0	0	0	0	0	0	0	0	0	0	0	0	0	0	0	0	0	4	10	5	29	89	8	6	2	65	23
Bacteria;Proteobacteria;Gammaproteobacteria;Cellvibrionales;Halieaceae;Luminiphilus;unknown species	OTU_1122	0	0	0	0	0	0	1	0	0	0	0	1	0	0	0	0	0	0	0	0	0	1	0	0	0	0	0	0	0	0	0	0	0	0	0	0	158	0	0	0	0	0	3	3	2	2	4	3
Bacteria;Proteobacteria;Gammaproteobacteria;Cellvibrionales;Halieaceae;Multi-affiliation;Multi-affiliation	OTU_1254	0	0	0	1	0	0	1	252	0	1	0	0	0	0	0	0	0	0	0	0	0	0	0	0	0	0	0	0	0	0	0	0	0	0	0	0	1	0	0	0	1	0	0	0	0	0	0	0
Bacteria;Proteobacteria;Gammaproteobacteria;Cellvibrionales;Halieaceae;OM60(NOR5) clade;Haliea sp.	OTU_541	0	0	0	0	0	0	0	2	2	0	0	0	1	0	0	1	782	2	1	0	0	1	0	0	1	0	0	0	0	0	1	0	0	0	0	0	0	0	6	5	4	10	16	14	16	11	9	8
Bacteria;Proteobacteria;Gammaproteobacteria;Cellvibrionales;Halieaceae;OM60(NOR5) clade;marine metagenome	OTU_571	1	1	0	0	1	2	1	0	0	1	0	0	1	0	0	0	2	0	1	1	1	1	2	0	2	0	1	0	0	0	0	0	0	0	1	0	0	0	2	0	1	1	0	1	1	0	0	2
Bacteria;Proteobacteria;Gammaproteobacteria;Cellvibrionales;Halieaceae;OM60(NOR5) clade;unknown species	OTU_306	2	0	0	0	1	0	0	3	0	0	2	0	2	0	1	1	1	1	1	0	0	1	2	1	4	0	0	0	0	0	2	0	1	2	3	0	1	0	3	5	2	0	5	2	2	2	3	3
Bacteria;Proteobacteria;Gammaproteobacteria;Cellvibrionales;Halieaceae;OM60(NOR5) clade;unknown species	OTU_447	0	1	220	1	0	0	1	0	1	0	0	0	0	0	0	0	0	0	0	1	0	621	0	0	0	0	11	0	0	0	0	0	0	1	1	0	241	0	14	12	28	1	7	1	4	6	6	9
Bacteria;Proteobacteria;Gammaproteobacteria;Cellvibrionales;Halieaceae;OM60(NOR5) clade;unknown species	OTU_457	1	0	1	1	1	1	0	1	0	0	1	0	1	1	0	0	0	0	0	1	0	1	0	1	1	1	1	0	0	0	0	0	0	1	1	0	3	0	0	0	3	0	1	1	0	1	1	2
Bacteria;Proteobacteria;Gammaproteobacteria;Cellvibrionales;Halieaceae;OM60(NOR5) clade;unknown species	OTU_810	0	0	0	0	0	0	2	0	0	0	0	0	0	0	0	0	0	0	0	0	0	1	0	0	0	0	0	0	0	0	1	0	0	0	0	0	0	0	0	0	0	1	0	0	0	1	0	0
Bacteria;Proteobacteria;Gammaproteobacteria;Cellvibrionales;Halieaceae;OM60(NOR5) clade;unknown species	OTU_910	0	0	1	1	0	1	0	0	0	0	0	0	0	0	0	0	0	323	0	0	0	0	0	0	0	0	0	0	0	0	0	0	0	0	0	0	0	0	0	2	0	0	0	1	0	0	0	0
Bacteria;Proteobacteria;Gammaproteobacteria;Cellvibrionales;Halieaceae;OM60(NOR5) clade;unknown species	OTU_940	1	0	1	0	0	0	1	0	1	1	0	0	0	0	0	1	365	0	0	1	0	0	0	3	0	0	0	0	0	0	0	0	1	0	0	0	0	0	5	4	2	1	2	0	3	4	3	4
Bacteria;Proteobacteria;Gammaproteobacteria;Cellvibrionales;Halieaceae;OM60(NOR5) clade;unknown species	OTU_1288	0	0	0	0	0	0	1	0	0	0	0	0	0	0	0	0	0	0	0	0	0	0	0	0	1	0	0	0	0	0	0	0	0	0	0	0	1	0	0	0	1	2	0	1	0	0	0	0
Bacteria;Proteobacteria;Gammaproteobacteria;Cellvibrionales;Porticoccaceae;Porticoccus;Multi-affiliation	OTU_924	0	1	0	1	0	0	0	0	0	0	0	0	0	0	0	0	0	0	0	0	0	0	0	0	0	0	0	0	0	0	1	0	1	0	0	0	0	0	0	0	0	1	2	1	0	0	0	0
Bacteria;Proteobacteria;Gammaproteobacteria;Cellvibrionales;Porticoccaceae;SAR92 clade;unknown species	OTU_1248	0	0	0	0	0	1	0	0	0	0	0	0	0	0	0	0	0	0	0	0	0	0	1	0	0	0	0	0	0	0	0	0	0	0	0	0	0	0	0	0	0	0	0	0	0	0	0	0
Bacteria;Proteobacteria;Gammaproteobacteria;Cellvibrionales;Spongiibacteraceae;BD1-7 clade;unknown species	OTU_892	0	0	0	0	0	0	0	0	0	1	0	0	1	1	0	0	0	0	0	0	0	0	0	0	0	0	0	0	0	0	0	0	1	0	0	0	0	474	0	0	0	0	0	0	0	0	0	0
Bacteria;Proteobacteria;Gammaproteobacteria;CH2b56;unknown family;unknown genus;unknown species	OTU_224	2	0	0	1	0	0	1	0	1	0	1	1	1	1	1	0	1	0	2	0	1	0	2	1	2	0	0	0	1	0	1510	0	69	1	2	0	0	1	6	4	1	140	310	1	2	0	43	46
Bacteria;Proteobacteria;Gammaproteobacteria;Chromatiales;Chromatiaceae;Candidatus Thiobios;sulfur-oxidizing bacterium ODIII6	OTU_44	7	3	6	4	1	10	13	6	2	6	8	2	4	1	5	4	4	0	4	5	6	11	14	293	16	714	8	0	5	0	4797	0	10	6	7	0	12	6	449	569	336	409	584	1189	1284	1138	440	497
Bacteria;Proteobacteria;Gammaproteobacteria;Chromatiales;Chromatiaceae;Candidatus Thiobios;sulfur-oxidizing bacterium ODIII6	OTU_89	6	1	2	327	0	2	4	50	0	1	59	3	3	0	1	1	4	1	0	2	2	4	561	489	211	1	0	0	3	0	7	0	2	0	4	0	120	1	23	19	20	48	68	1219	1142	1120	123	106
Bacteria;Proteobacteria;Gammaproteobacteria;Chromatiales;Chromatiaceae;Candidatus Thiobios;sulfur-oxidizing bacterium ODIII6	OTU_405	0	0	0	1	0	0	1	0	1	2	0	0	0	0	0	0	0	0	0	0	1	1	0	2	2	0	0	0	0	0	3	0	0	2	0	0	0	0	17	23	23	272	123	9	14	20	269	283
Bacteria;Proteobacteria;Gammaproteobacteria;Chromatiales;Chromatiaceae;Candidatus Thiobios;sulfur-oxidizing bacterium ODIII6	OTU_850	0	0	0	0	0	0	0	0	0	0	0	0	0	0	0	0	1	0	0	0	0	1	1	0	1	0	0	0	0	0	0	0	0	0	0	0	1	0	0	0	3	0	0	154	146	131	0	1
Bacteria;Proteobacteria;Gammaproteobacteria;Chromatiales;Chromatiaceae;Candidatus Thiobios;unknown species	OTU_1471	0	0	1	0	0	0	0	0	0	0	0	0	0	1	0	0	0	0	0	0	0	0	0	0	1	0	0	0	0	0	0	0	0	0	0	0	0	0	64	63	113	0	4	1	0	0	1	0
Bacteria;Proteobacteria;Gammaproteobacteria;Chromatiales;Chromatiaceae;Candidatus Thiobios;unknown species	OTU_1582	0	0	0	0	0	0	1	0	0	0	0	0	0	0	0	0	0	0	0	1	1	0	0	0	0	2	0	0	0	0	0	0	0	0	0	0	0	0	77	57	79	0	5	4	2	6	3	2
Bacteria;Proteobacteria;Gammaproteobacteria;Chromatiales;Chromatiaceae;Thiohalocapsa;unknown species	OTU_603	0	0	92	0	0	0	1	0	0	2	53	1	1	0	0	0	0	0	591	0	0	0	0	0	0	0	3	0	0	0	0	0	1	0	1	0	1	0	2	0	0	0	0	28	22	21	0	0
Bacteria;Proteobacteria;Gammaproteobacteria;Chromatiales;Chromatiaceae;Thiohalocapsa;unknown species	OTU_958	0	0	0	0	0	0	0	0	0	0	0	0	1	0	0	0	0	0	0	0	0	1	0	0	0	0	0	0	0	0	0	0	1	0	1	0	0	0	12	19	16	8	11	83	82	64	41	37
Bacteria;Proteobacteria;Gammaproteobacteria;Chromatiales;Sedimenticolaceae;Sedimenticola;Multi-affiliation	OTU_835	0	1	0	0	0	0	1	0	0	0	0	1	0	0	0	0	0	0	0	0	0	0	0	0	0	0	0	0	0	0	1	0	0	1	0	0	0	0	9	45	4	105	265	1	1	0	10	23
Bacteria;Proteobacteria;Gammaproteobacteria;Chromatiales;Sedimenticolaceae;Sedimenticola;unknown species	OTU_446	1	1	1	0	0	0	1	124	0	0	0	1	106	1	0	50	1	0	2	0	0	0	0	109	1	324	0	0	1	0	0	0	0	0	0	0	0	1	4	1	1	0	0	163	160	140	1	1
Bacteria;Proteobacteria;Gammaproteobacteria;Chromatiales;Sedimenticolaceae;unknown genus;unknown species	OTU_189	0	0	0	0	0	1	0	1	1	2	1	0	2	0	1	0	2	0	3	2	2	0	1	1	4	0	0	0	1	0	0	0	498	0	1	0	91	4	371	523	508	101	108	99	104	85	5	7
Bacteria;Proteobacteria;Gammaproteobacteria;Chromatiales;Sedimenticolaceae;unknown genus;unknown species	OTU_818	0	1	1	0	0	0	0	0	0	0	0	0	0	0	1	0	1	0	1	0	0	0	2	1	2	0	0	0	0	0	0	0	1	0	0	0	0	0	1	19	6	27	8	147	140	155	0	0
Bacteria;Proteobacteria;Gammaproteobacteria;Chromatiales;Sedimenticolaceae;unknown genus;unknown species	OTU_984	0	0	0	0	0	0	0	0	0	1	0	0	0	0	0	0	1	0	0	0	0	0	1	0	2	0	0	0	0	0	0	0	0	1	0	0	0	0	1	1	0	0	0	3	0	0	131	111
Bacteria;Proteobacteria;Gammaproteobacteria;Coxiellales;Coxiellaceae;Coxiella;metagenome	OTU_672	0	0	0	1	0	0	0	0	0	0	0	0	0	0	0	0	0	0	0	0	0	659	0	0	1	1	1	0	0	0	0	0	0	0	0	0	0	1	0	1	0	0	0	0	0	1	0	1
Bacteria;Proteobacteria;Gammaproteobacteria;Diplorickettsiales;Diplorickettsiaceae;Aquicella;unknown species	OTU_743	0	0	1	1	0	0	0	1	0	0	0	0	1	582	0	0	0	0	0	0	1	0	0	0	0	0	0	0	0	0	0	0	0	1	0	0	1	0	1	1	0	1	1	1	0	0	1	0
Bacteria;Proteobacteria;Gammaproteobacteria;EC3;unknown family;unknown genus;unknown species	OTU_1167	0	0	0	0	0	0	0	0	0	0	0	0	0	0	0	0	0	0	0	0	1	0	0	0	0	1	0	0	0	0	0	0	0	0	0	0	0	0	0	0	1	0	0	2	0	1	0	0
Bacteria;Proteobacteria;Gammaproteobacteria;Ectothiorhodospirales;Ectothiorhodospiraceae;Thiogranum;unknown species	OTU_270	0	1	0	1	0	1	1	0	1	1	0	1	1	0	0	0	0	2	0	0	0	1	2	0	0	0	0	0	1	0	2	0	0	0	0	0	1	1	410	371	612	35	64	130	161	117	24	11
Bacteria;Proteobacteria;Gammaproteobacteria;Ectothiorhodospirales;Ectothiorhodospiraceae;Thiogranum;unknown species	OTU_424	0	1	1	2	0	0	0	61	0	1	0	1	1	0	1	1	0	0	1	0	1	2	0	0	2	2	0	0	0	0	0	0	1	2	0	0	0	1	195	138	163	117	161	44	44	42	107	117
Bacteria;Proteobacteria;Gammaproteobacteria;Ectothiorhodospirales;Ectothiorhodospiraceae;Thiogranum;unknown species	OTU_433	1	0	0	0	0	1	0	0	1	0	0	0	1	0	1	1	1	0	0	1	0	1	8	0	1	1	0	0	0	0	0	0	1	1	2	0	1	0	15	113	39	802	132	9	5	4	34	34
Bacteria;Proteobacteria;Gammaproteobacteria;Ectothiorhodospirales;Ectothiorhodospiraceae;Thiogranum;unknown species	OTU_501	2	1	0	0	1	0	0	0	0	1	1	0	1	0	0	0	0	0	1	0	0	0	0	0	1	0	0	0	1	0	0	0	1	0	0	0	0	2	393	186	363	64	34	2	14	3	2	3
Bacteria;Proteobacteria;Gammaproteobacteria;Ectothiorhodospirales;Ectothiorhodospiraceae;Thiogranum;unknown species	OTU_528	1	0	0	0	0	0	1	0	0	0	0	0	2	0	0	0	1	0	0	1	0	1	0	0	1	1	0	0	1	0	0	0	45	0	2	0	0	0	189	200	126	75	83	43	59	61	13	15
Bacteria;Proteobacteria;Gammaproteobacteria;Ectothiorhodospirales;Ectothiorhodospiraceae;Thiogranum;unknown species	OTU_946	0	0	0	0	0	0	0	0	0	0	0	1	0	1	0	0	0	0	0	0	0	0	1	0	0	0	0	0	0	0	0	0	1	0	0	0	0	0	76	55	38	160	48	3	3	2	5	2
Bacteria;Proteobacteria;Gammaproteobacteria;Ectothiorhodospirales;Ectothiorhodospiraceae;Thiogranum;unknown species	OTU_1019	2	1	0	1	0	1	0	0	0	0	0	0	0	0	0	0	0	0	0	0	0	0	321	0	0	0	0	0	0	0	0	0	0	0	1	0	0	0	0	1	2	1	1	10	14	14	0	0
Bacteria;Proteobacteria;Gammaproteobacteria;Ectothiorhodospirales;Ectothiorhodospiraceae;Thiogranum;unknown species	OTU_1027	0	0	0	0	0	1	0	0	1	0	0	0	1	1	0	0	0	0	0	0	0	0	0	0	0	1	0	0	0	0	0	0	0	1	0	0	0	0	2	5	1	210	113	0	0	0	4	3
Bacteria;Proteobacteria;Gammaproteobacteria;Ectothiorhodospirales;Ectothiorhodospiraceae;Thiogranum;unknown species	OTU_1038	0	0	0	0	0	0	0	0	0	0	0	0	0	1	0	1	0	0	0	0	0	0	0	2	1	0	0	0	0	0	0	0	0	0	1	0	0	0	19	16	22	9	6	138	104	81	0	0
Bacteria;Proteobacteria;Gammaproteobacteria;Ectothiorhodospirales;Ectothiorhodospiraceae;unknown genus;unknown species	OTU_85	2	0	5	2	0	2	2	2	1	3	3	1	3	1	0	2	2	3	6	1	2	2	2	1	4	4	0	0	2	0	1	0	3	1	0	0	3	0	1031	1329	1172	1420	323	302	304	227	3	3
Bacteria;Proteobacteria;Gammaproteobacteria;Ectothiorhodospirales;Ectothiorhodospiraceae;unknown genus;unknown species	OTU_476	0	0	0	0	0	0	1	0	0	0	0	0	1	0	0	0	0	1	0	0	0	0	0	1	1	0	0	0	0	0	0	0	0	1	1	0	0	0	0	0	0	0	0	1	0	0	0	1
Bacteria;Proteobacteria;Gammaproteobacteria;Ectothiorhodospirales;Ectothiorhodospiraceae;unknown genus;unknown species	OTU_651	0	0	97	1	0	0	3	0	0	0	2	1	2	0	0	2	604	1	0	0	0	3	137	0	0	0	3	0	0	0	0	0	1	1	1	0	0	2	2	1	0	0	2	91	75	71	0	5
Bacteria;Proteobacteria;Gammaproteobacteria;Ectothiorhodospirales;Ectothiorhodospiraceae;unknown genus;unknown species	OTU_1015	0	0	0	1	0	0	0	0	0	0	76	0	0	0	0	0	0	0	0	0	0	0	1	0	0	0	0	0	0	0	1	0	0	0	1	0	0	0	0	1	1	0	1	97	107	88	0	0
Bacteria;Proteobacteria;Gammaproteobacteria;Ectothiorhodospirales;Ectothiorhodospiraceae;unknown genus;unknown species	OTU_1225	0	1	0	0	0	0	0	0	0	0	0	0	0	0	0	0	0	1	0	0	0	0	0	0	0	0	0	0	0	0	0	0	0	0	0	0	0	0	66	65	54	19	19	16	24	15	0	1
Bacteria;Proteobacteria;Gammaproteobacteria;Ectothiorhodospirales;Thioalkalispiraceae;Thioalkalispira;unknown species	OTU_691	1	0	0	1	0	0	0	0	0	0	0	0	0	0	2	0	0	0	0	0	0	0	0	0	0	1	0	0	0	0	0	0	0	0	0	0	1	0	0	1	1	14	10	0	1	2	204	183
Bacteria;Proteobacteria;Gammaproteobacteria;Ectothiorhodospirales;Thioalkalispiraceae;Thiohalophilus;sulfur-oxidizing bacterium OAII2	OTU_121	3	0	3	4	1	3	4	3	1	2	0	1	1	0	1	3	0	3	1	3	4	2	2	2	4	0	0	0	3	0	1	0	4	0	1	0	467	5	84	96	203	931	162	113	151	104	689	622
Bacteria;Proteobacteria;Gammaproteobacteria;Ectothiorhodospirales;Thioalkalispiraceae;Thiohalophilus;unknown species	OTU_223	2	2	2	0	0	1	1	2	260	2	2	1	2	1	0	2	1	1	1	0	1	2	2	0	3	0	1	0	0	0	2	0	1	0	1	0	0	2	618	500	547	58	39	26	16	4	2	2
Bacteria;Proteobacteria;Gammaproteobacteria;Ectothiorhodospirales;Thioalkalispiraceae;Thiohalophilus;unknown species	OTU_376	1	0	1	3	0	0	3	2	0	1	0	1	2	1	0	0	1	0	1	1	3	0	2	0	2	1	0	0	0	0	0	0	1	0	1	0	0	0	187	313	123	381	352	41	41	27	171	181
Bacteria;Proteobacteria;Gammaproteobacteria;Ectothiorhodospirales;Thioalkalispiraceae;Thiohalophilus;unknown species	OTU_468	1	1	0	0	0	0	0	0	1	0	1	616	2	0	1	0	1	0	1	0	1	1	0	0	0	1	0	0	0	0	0	0	2	0	0	0	1	0	18	12	12	0	1	154	147	130	4	0
Bacteria;Proteobacteria;Gammaproteobacteria;Ectothiorhodospirales;Thioalkalispiraceae;Thiohalophilus;unknown species	OTU_674	0	0	1	0	0	1	0	0	0	0	1	0	1	0	0	0	0	0	0	0	0	0	0	1	2	1	1	0	0	0	0	0	1	0	0	0	0	0	201	154	256	7	5	0	1	2	0	0
Bacteria;Proteobacteria;Gammaproteobacteria;Ectothiorhodospirales;Thioalkalispiraceae;Thiohalophilus;unknown species	OTU_706	2	0	0	0	0	0	0	0	0	0	0	0	0	0	0	0	0	0	0	0	0	0	0	1	1	1	0	0	0	0	0	0	0	0	0	0	0	0	170	155	198	28	37	0	0	0	0	0
Bacteria;Proteobacteria;Gammaproteobacteria;Ectothiorhodospirales;Thioalkalispiraceae;Thiohalophilus;unknown species	OTU_1026	1	0	0	0	1	0	0	0	0	0	0	1	0	0	0	1	0	0	0	0	0	0	0	0	0	0	0	0	0	0	0	0	0	0	1	0	0	0	124	162	106	3	3	0	0	1	2	1
Bacteria;Proteobacteria;Gammaproteobacteria;Ectothiorhodospirales;Thioalkalispiraceae;Thiohalophilus;unknown species	OTU_1253	0	0	0	0	0	0	0	0	0	0	1	0	0	0	0	0	0	0	0	0	1	0	0	0	0	0	0	0	0	0	1	0	0	0	0	0	0	0	120	58	86	3	5	0	0	0	2	0
Bacteria;Proteobacteria;Gammaproteobacteria;Ectothiorhodospirales;Thioalkalispiraceae;Thiohalophilus;unknown species	OTU_1273	0	0	1	0	0	0	0	0	0	0	0	0	0	0	0	0	0	0	0	0	0	1	0	0	0	1	0	0	0	0	0	0	1	0	0	0	0	0	56	80	68	7	7	86	84	82	0	0
Bacteria;Proteobacteria;Gammaproteobacteria;Ectothiorhodospirales;Thioalkalispiraceae;Thiohalophilus;unknown species	OTU_1383	0	0	0	0	0	0	0	0	0	0	0	1	0	0	0	0	0	0	0	0	0	0	0	0	0	0	0	0	0	0	0	0	0	0	0	0	0	0	38	22	37	37	59	27	26	24	0	0
Bacteria;Proteobacteria;Gammaproteobacteria;Ectothiorhodospirales;Thioalkalispiraceae;Thioprofundum;Multi-affiliation	OTU_230	0	0	0	2	0	0	1	2	0	0	0	0	0	0	0	1	0	1	3	2	2	0	0	0	1	0	0	0	0	0	1	0	1	2	1	0	5	0	486	201	154	419	733	1	1	3	1	4
Bacteria;Proteobacteria;Gammaproteobacteria;Ectothiorhodospirales;Thioalkalispiraceae;Thioprofundum;Multi-affiliation	OTU_776	1	0	0	1	0	0	0	0	1	0	0	0	0	0	0	0	0	1	0	1	0	0	0	0	1	0	0	0	0	0	0	0	0	0	0	0	0	0	9	11	9	56	29	0	0	2	149	156
Bacteria;Proteobacteria;Gammaproteobacteria;Ectothiorhodospirales;Thioalkalispiraceae;Thioprofundum;Thioprofundum hispidum	OTU_886	0	0	0	0	0	0	0	0	0	0	0	0	0	0	0	0	0	0	0	1	0	0	0	0	1	0	1	0	0	0	1	0	0	0	1	0	0	0	133	110	177	19	5	0	0	0	0	0
Bacteria;Proteobacteria;Gammaproteobacteria;Ectothiorhodospirales;Thioalkalispiraceae;Thioprofundum;unknown species	OTU_1330	0	0	0	0	0	0	0	0	0	0	0	0	0	0	0	0	1	0	1	0	0	0	0	0	1	0	0	0	0	0	0	0	0	0	0	0	0	1	31	33	19	63	147	5	7	6	7	2
Bacteria;Proteobacteria;Gammaproteobacteria;Enterobacteriales;Enterobacteriaceae;Multi-affiliation;Multi-affiliation	OTU_676	0	0	1	0	0	0	1	0	0	0	0	0	0	1	122	0	0	0	1	0	0	0	0	0	1	0	0	0	554	0	0	0	2	0	0	0	0	0	0	0	0	0	0	0	0	0	0	0
Bacteria;Proteobacteria;Gammaproteobacteria;Enterobacteriales;Enterobacteriaceae;Multi-affiliation;Multi-affiliation	OTU_944	0	0	0	0	0	0	0	0	0	0	0	0	0	0	0	0	0	0	0	0	0	0	0	0	0	0	0	0	0	370	0	0	0	0	0	0	0	0	0	0	0	0	0	0	0	0	0	0
Bacteria;Proteobacteria;Gammaproteobacteria;FGL7S;unknown family;unknown genus;unknown species	OTU_1060	1	0	0	0	0	0	1	1	0	0	0	0	1	0	0	0	0	1	0	0	0	0	0	0	1	1	0	0	0	0	1	0	2	1	0	0	1	0	155	114	137	3	7	2	0	0	0	0
Bacteria;Proteobacteria;Gammaproteobacteria;Francisellales;Francisellaceae;[Caedibacter] taeniospiralis group;Multi-affiliation	OTU_763	0	0	1	0	0	0	0	0	0	0	0	0	0	0	0	1	0	0	0	0	0	1	0	0	0	0	0	0	558	0	0	0	0	0	1	0	0	1	0	0	0	0	1	0	1	1	1	0
Bacteria;Proteobacteria;Gammaproteobacteria;Francisellales;Francisellaceae;Francisella;Francisella philomiragia	OTU_959	0	1	0	1	0	0	1	0	0	0	0	0	0	212	180	0	0	0	0	0	0	1	3	0	1	0	0	0	0	0	1	0	1	0	0	0	0	0	0	0	0	0	0	0	1	0	0	0
Bacteria;Proteobacteria;Gammaproteobacteria;Francisellales;Francisellaceae;Francisella;Francisella sp.	OTU_297	0	0	0	2	0	0	2	1	0	2	1	2	92	1	850	0	1	0	1	1	2	2	1	1	2	2	0	0	1	0	1	0	50	0	0	0	0	0	1	1	0	0	2	1	0	0	0	2
Bacteria;Proteobacteria;Gammaproteobacteria;Francisellales;Francisellaceae;Francisella;Francisella sp.	OTU_436	1	0	1	1267	0	1	1	1	0	1	0	0	3	0	0	1	1	2	0	0	0	0	1	1	2	0	0	0	2	0	1	0	1	0	1	0	0	0	1	0	0	0	1	0	1	2	0	3
Bacteria;Proteobacteria;Gammaproteobacteria;Francisellales;Francisellaceae;Francisella;unknown species	OTU_107	0	1	0	1	2	2	1	4	0	2	0	2	2	2	1	1	1	0	3	2	3	0	1	3	3	1	1	0	1	0	2	0	0	2	1	0	0	2	2	5	4	5	4	3	1	2	1	2
Bacteria;Proteobacteria;Gammaproteobacteria;Francisellales;Francisellaceae;Francisella;unknown species	OTU_580	0	0	0	0	0	0	0	0	0	0	0	0	0	0	0	0	0	0	0	0	0	0	0	0	0	0	0	0	0	0	0	0	0	0	0	758	0	0	0	0	0	0	0	0	0	0	0	0
Bacteria;Proteobacteria;Gammaproteobacteria;Francisellales;Francisellaceae;Multi-affiliation;Multi-affiliation	OTU_1040	0	0	0	0	0	0	0	1	0	0	0	0	0	0	0	0	0	0	0	0	0	0	0	0	0	0	0	0	0	0	0	0	0	0	0	0	379	0	0	0	0	0	0	0	0	0	0	0
Bacteria;Proteobacteria;Gammaproteobacteria;Francisellales;Francisellaceae;unknown genus;unknown species	OTU_639	0	0	0	1	0	1	0	1	0	238	0	0	0	349	0	1	0	0	1	0	0	0	0	0	1	0	0	0	0	0	0	0	2	0	0	0	118	0	0	0	1	1	0	0	1	0	1	0
Bacteria;Proteobacteria;Gammaproteobacteria;Ga0077536;unknown family;unknown genus;unknown species	OTU_812	0	0	1	0	0	1	0	0	0	0	0	0	0	0	1	0	0	0	0	0	0	0	1	0	0	0	0	0	0	0	0	0	0	0	0	0	0	0	0	0	0	1	1	1	0	0	0	0
Bacteria;Proteobacteria;Gammaproteobacteria;Gammaproteobacteria Incertae Sedis;unknown family;Marinicella;unknown species	OTU_853	0	1	1	0	0	0	0	1	0	0	0	0	1	0	0	1	0	0	0	0	0	0	0	0	313	0	0	0	1	0	0	0	58	0	0	0	1	0	0	0	0	18	51	5	7	22	4	3
Bacteria;Proteobacteria;Gammaproteobacteria;Gammaproteobacteria Incertae Sedis;unknown family;unknown genus;unknown species	OTU_750	1	0	0	1	0	2	0	0	0	1	0	1	0	0	0	0	0	444	0	0	0	0	0	0	0	0	0	0	1	0	0	0	0	0	0	0	0	0	30	40	49	0	3	1	1	6	0	9
Bacteria;Proteobacteria;Gammaproteobacteria;Gammaproteobacteria Incertae Sedis;unknown family;unknown genus;unknown species	OTU_829	0	0	0	0	0	0	0	0	0	0	1	0	1	0	0	0	0	0	1	0	0	0	0	0	0	499	0	0	0	0	1	0	0	0	0	0	0	1	4	1	2	2	6	1	5	2	5	6
Bacteria;Proteobacteria;Gammaproteobacteria;Gammaproteobacteria Incertae Sedis;unknown family;unknown genus;unknown species	OTU_873	0	0	0	0	0	0	0	1	0	0	0	0	0	0	0	0	0	0	0	0	0	457	1	1	0	0	0	0	0	0	0	0	0	0	0	0	0	0	4	7	5	1	1	0	1	1	7	4
Bacteria;Proteobacteria;Gammaproteobacteria;Immundisolibacterales;Immundisolibacteraceae;unknown genus;unknown species	OTU_954	1	0	1	1	0	0	0	0	0	0	1	1	0	0	0	1	0	0	0	1	0	0	0	0	1	0	0	0	0	0	1	0	0	0	0	0	0	0	5	14	7	49	67	10	7	14	188	160
Bacteria;Proteobacteria;Gammaproteobacteria;KI89A clade;unknown family;unknown genus;unknown species	OTU_443	0	1	0	0	0	1	1	0	0	0	1	0	0	0	0	1	0	0	1	0	0	0	1	0	1	0	1	0	0	0	1	0	113	0	1	0	0	0	77	90	78	96	151	7	8	12	197	156
Bacteria;Proteobacteria;Gammaproteobacteria;KI89A clade;unknown family;unknown genus;unknown species	OTU_565	1	0	0	0	0	0	0	0	0	0	0	0	0	0	0	0	0	0	0	0	1	0	0	0	0	1	1	0	0	0	0	0	0	0	1	0	2	0	0	2	0	0	1	1	0	0	1	1
Bacteria;Proteobacteria;Gammaproteobacteria;KI89A clade;unknown family;unknown genus;unknown species	OTU_687	0	0	1	1	0	0	0	0	0	1	0	0	0	0	0	0	0	0	0	0	1	0	0	0	2	1	0	0	0	0	0	0	0	1	0	0	2	1	0	0	0	0	0	0	0	1	0	0
Bacteria;Proteobacteria;Gammaproteobacteria;KI89A clade;unknown family;unknown genus;unknown species	OTU_900	0	0	0	0	0	0	0	0	0	0	0	0	0	0	0	1	0	0	0	0	0	0	0	0	0	0	0	0	0	0	0	0	0	0	0	0	0	0	10	25	7	44	24	40	35	47	79	110
Bacteria;Proteobacteria;Gammaproteobacteria;KI89A clade;unknown family;unknown genus;unknown species	OTU_980	0	0	0	1	0	0	0	0	0	0	0	0	0	0	0	0	0	0	0	0	0	0	0	0	0	0	0	0	0	0	1	0	0	0	0	0	106	1	17	32	10	14	12	7	7	1	74	46
Bacteria;Proteobacteria;Gammaproteobacteria;KI89A clade;unknown family;unknown genus;unknown species	OTU_1252	0	0	0	0	0	0	0	0	0	0	0	0	0	0	0	0	0	0	2	1	0	0	0	0	0	0	0	0	0	0	0	0	0	0	1	0	0	0	0	0	0	6	12	0	0	0	40	124
Bacteria;Proteobacteria;Gammaproteobacteria;Legionellales;Legionellaceae;Legionella;Legionella sp.	OTU_847	0	0	0	0	0	0	0	0	0	0	0	0	0	0	0	0	0	0	0	0	0	0	0	0	0	0	0	448	0	0	0	0	0	0	0	0	0	0	0	0	0	0	0	0	0	0	0	0
Bacteria;Proteobacteria;Gammaproteobacteria;Legionellales;Legionellaceae;Legionella;Multi-affiliation	OTU_1108	0	0	0	0	0	0	0	0	0	0	1	0	0	0	0	1	0	1	0	0	0	0	349	2	1	0	0	0	0	0	0	0	0	0	1	0	0	0	0	0	0	0	2	0	1	0	0	0
Bacteria;Proteobacteria;Gammaproteobacteria;Legionellales;Legionellaceae;unknown genus;unknown species	OTU_642	2	1	0	1	0	0	0	0	0	703	0	0	0	0	0	0	0	0	0	1	0	0	0	0	1	0	0	0	0	0	0	0	0	1	1	0	0	3	1	1	0	0	0	1	0	1	0	1
Bacteria;Proteobacteria;Gammaproteobacteria;Methylococcales;Methylohalobiaceae;Methylohalobius;Methylothermaceae bacteria B42	OTU_893	1	0	0	0	0	0	0	0	0	0	0	0	0	0	0	0	0	0	1	0	0	0	0	0	1	0	0	0	0	0	0	0	1	0	0	0	258	0	2	3	1	29	30	2	0	0	29	54
Bacteria;Proteobacteria;Gammaproteobacteria;Methylococcales;Methylohalobiaceae;Methylohalobius;Methylothermaceae bacteria B42	OTU_1193	0	0	0	0	0	0	0	0	0	0	0	0	0	0	0	1	0	0	0	0	0	0	0	0	0	0	0	0	0	0	1	0	0	0	0	0	0	0	6	12	11	4	10	0	0	1	73	92
Bacteria;Proteobacteria;Gammaproteobacteria;Multi-affiliation;Multi-affiliation;Multi-affiliation;Multi-affiliation	OTU_100	0	0	0	0	0	0	0	62	0	0	0	0	79	0	0	0	0	0	0	0	0	0	0	0	0	0	0	1427	0	2915	0	229	0	0	0	0	0	0	0	0	0	0	0	0	0	0	0	0
Bacteria;Proteobacteria;Gammaproteobacteria;Multi-affiliation;Multi-affiliation;Multi-affiliation;Multi-affiliation	OTU_550	0	0	0	0	0	0	0	0	0	0	0	0	2	1	1	1	0	0	2	0	1	0	0	0	2	0	1	0	0	0	1	0	0	0	0	0	0	1	1	1	0	3	1	1	1	0	257	369
Bacteria;Proteobacteria;Gammaproteobacteria;Multi-affiliation;Multi-affiliation;Multi-affiliation;Multi-affiliation	OTU_555	0	0	0	1	0	0	0	0	0	0	1	1	0	0	0	0	0	0	1	0	0	844	0	0	1	0	0	0	0	0	0	0	0	0	1	0	0	1	2	1	0	1	1	0	1	1	1	3
Bacteria;Proteobacteria;Gammaproteobacteria;Multi-affiliation;Multi-affiliation;Multi-affiliation;Multi-affiliation	OTU_710	3	1	0	0	0	0	0	0	0	0	152	0	1	0	0	0	0	0	1	0	0	0	0	0	403	0	0	0	1	0	1	0	0	0	0	0	1	0	3	3	3	1	7	21	21	13	2	7
Bacteria;Proteobacteria;Gammaproteobacteria;Multi-affiliation;Multi-affiliation;Multi-affiliation;Multi-affiliation	OTU_1181	0	0	0	0	0	0	0	0	0	0	0	0	1	0	0	0	0	0	0	0	0	0	153	0	0	0	0	0	0	0	0	0	1	0	0	0	0	0	1	0	0	0	0	31	47	52	1	0
Bacteria;Proteobacteria;Gammaproteobacteria;Nitrococcales;Halorhodospiraceae;Sulfurivirga;unknown species	OTU_417	1	0	0	0	0	1	0	1	0	1	0	0	0	2	1	0	0	0	0	1	0	0	1	1	2	0	0	0	0	0	0	0	1	1	0	0	0	1	5	3	5	857	366	1	2	1	5	5
Bacteria;Proteobacteria;Gammaproteobacteria;Nitrococcales;Nitrococcaceae;Halopeptonella;unknown species	OTU_1186	0	0	1	0	0	0	0	0	0	0	0	0	0	0	0	0	0	0	0	0	0	0	0	1	0	0	0	0	0	0	0	0	0	0	0	0	0	0	1	0	0	1	1	77	87	100	0	0
Bacteria;Proteobacteria;Gammaproteobacteria;Nitrosococcales;Nitrosococcaceae;AqS1;unknown species	OTU_925	0	0	0	0	0	0	0	0	0	1	0	0	0	0	0	0	0	0	0	0	0	0	0	0	0	0	0	0	1	0	1	0	0	0	0	0	1	0	1	1	1	0	1	0	0	0	90	192
Bacteria;Proteobacteria;Gammaproteobacteria;Oceanospirillales;Alcanivoracaceae;Alcanivorax;Alcanivorax venustensis	OTU_247	1	0	0	1	1	0	3	217	0	2	1	1	0	1	0	144	0	0	0	1	1	5	1	23	1	0	1	0	0	0	0	0	1	3	0	0	1	1	14	1	3	1	0	2	1	2	0	1
Bacteria;Proteobacteria;Gammaproteobacteria;Oceanospirillales;Alcanivoracaceae;Alcanivorax;Alcanivorax venustensis	OTU_901	0	0	0	0	0	0	38	0	0	1	1	0	0	0	0	1	0	0	1	0	1	470	0	0	0	0	0	0	0	0	0	0	0	0	0	0	0	0	0	0	0	0	0	0	0	0	0	1
Bacteria;Proteobacteria;Gammaproteobacteria;Oceanospirillales;Endozoicomonadaceae;Endozoicomonas;unknown species	OTU_1227	0	0	0	0	0	0	0	0	0	0	0	0	1	0	0	1	0	0	1	272	0	0	0	0	0	0	0	0	0	0	1	0	0	0	0	0	0	0	0	0	0	2	0	0	1	0	0	0
Bacteria;Proteobacteria;Gammaproteobacteria;Oceanospirillales;Halomonadaceae;Halomonas;Multi-affiliation	OTU_1073	0	0	0	0	0	0	0	0	0	0	0	0	0	0	0	0	0	0	0	0	0	0	0	0	0	0	0	296	0	0	0	0	0	0	0	0	0	0	0	0	0	0	0	0	0	0	0	0
Bacteria;Proteobacteria;Gammaproteobacteria;Oceanospirillales;Litoricolaceae;Litoricola;unknown species	OTU_1659	1	0	0	1	0	0	0	0	0	0	0	0	0	0	0	0	0	0	0	0	0	0	0	0	0	0	0	0	0	0	0	0	0	0	0	0	0	0	0	1	1	0	0	0	0	0	0	0
Bacteria;Proteobacteria;Gammaproteobacteria;Oceanospirillales;Marinomonadaceae;Marinomonas;Marinomonas sp.	OTU_172	3	5	0	0	0	1	3	2	0	0	1	1	1	0	0	0	0	445	0	3	3	289	1	0	5	429	1	0	1	13	4	1	1711	2	1	0	961	1	2	0	1	1	1	2	1	2	3	3
Bacteria;Proteobacteria;Gammaproteobacteria;Oceanospirillales;Marinomonadaceae;Marinomonas;Multi-affiliation	OTU_766	0	1	0	0	0	0	0	0	0	0	1	0	0	1	0	0	2	0	1	1	0	1	1	0	0	0	0	0	0	0	0	0	235	0	1	0	342	0	0	0	0	0	0	0	2	1	0	0
Bacteria;Proteobacteria;Gammaproteobacteria;Oceanospirillales;Marinomonadaceae;Marinomonas;Multi-affiliation	OTU_855	0	0	2	0	0	2	0	0	0	0	0	0	0	0	1	48	0	0	1	1	0	0	0	0	0	0	0	0	1	0	1	0	575	2	0	0	0	0	0	1	1	0	0	0	1	0	1	0
Bacteria;Proteobacteria;Gammaproteobacteria;Oceanospirillales;Nitrincolaceae;Marinobacterium;unknown species	OTU_298	2	0	0	0	0	1	1	0	1	1	0	0	2	0	0	0	1	3	0	0	0	1	0	1	6	0	4	0	1	0	2	0	159	0	0	0	2	1	2	0	4	2	0	1	0	0	0	2
Bacteria;Proteobacteria;Gammaproteobacteria;Oceanospirillales;Nitrincolaceae;Marinobacterium;unknown species	OTU_592	1	0	1	1	0	0	1	0	0	1	0	1	0	0	0	0	0	0	0	0	1	0	1	1	0	1	0	0	0	0	0	0	1	0	1	0	0	0	0	0	0	0	0	1	0	0	1	0
Bacteria;Proteobacteria;Gammaproteobacteria;Oceanospirillales;Oleiphilaceae;Oleiphilus;Multi-affiliation	OTU_1075	0	0	0	0	0	0	0	0	0	0	0	0	0	0	0	0	0	0	0	0	0	0	0	0	0	0	0	297	0	0	0	0	0	0	0	0	0	0	0	0	0	1	1	0	0	0	1	3
Bacteria;Proteobacteria;Gammaproteobacteria;Oceanospirillales;Oleiphilaceae;Oleiphilus;Oleiphilus sp.	OTU_1300	0	0	0	0	0	1	0	0	0	0	0	0	0	0	0	0	0	1	0	0	0	1	0	221	0	0	0	0	0	0	1	0	0	0	0	0	0	0	0	0	0	0	0	1	1	1	0	0
Bacteria;Proteobacteria;Gammaproteobacteria;Oceanospirillales;Oleiphilaceae;Oleiphilus;unknown species	OTU_610	1	0	0	0	0	0	0	1	0	0	0	1	0	0	0	1	2	0	0	2	1	2	0	0	1	1	0	0	1	0	0	0	1	0	0	0	0	0	2	0	0	0	5	2	2	1	1	0
Bacteria;Proteobacteria;Gammaproteobacteria;Oceanospirillales;Oleiphilaceae;Oleiphilus;unknown species	OTU_852	0	0	0	0	0	0	0	0	1	0	0	0	0	0	0	0	0	0	1	0	1	0	0	2	0	0	0	0	0	0	0	0	43	0	0	0	0	472	0	0	0	0	1	0	0	0	0	0
Bacteria;Proteobacteria;Gammaproteobacteria;Oceanospirillales;Oleiphilaceae;Oleiphilus;unknown species	OTU_1147	0	0	0	0	0	0	0	0	0	0	0	0	0	0	0	0	0	0	0	1	0	0	0	0	0	0	0	0	0	0	0	0	0	0	0	0	0	0	9	16	2	32	44	0	0	0	74	54
Bacteria;Proteobacteria;Gammaproteobacteria;Oceanospirillales;Pseudohongiellaceae;Pseudohongiella;unknown species	OTU_734	0	0	0	0	0	1	0	1	6	0	0	0	0	0	0	2	0	0	1	2	1	0	0	0	1	1	1	0	0	0	0	0	0	0	0	0	0	0	2	0	1	0	0	2	1	0	5	0
Bacteria;Proteobacteria;Gammaproteobacteria;Oceanospirillales;Pseudohongiellaceae;Pseudohongiella;unknown species	OTU_756	0	0	1	1	0	1	0	0	0	0	0	0	0	0	0	1	0	0	1	1	0	0	1	0	1	0	0	0	0	0	1	0	0	0	1	0	0	0	1	1	0	1	1	1	0	0	1	0
Bacteria;Proteobacteria;Gammaproteobacteria;Oceanospirillales;Pseudohongiellaceae;Pseudohongiella;unknown species	OTU_797	0	0	0	2	0	1	0	0	192	0	0	0	3	0	0	0	1	0	0	2	0	1	0	1	0	0	1	0	0	0	1	0	0	0	0	0	0	0	0	0	0	0	0	2	0	1	2	1
Bacteria;Proteobacteria;Gammaproteobacteria;Oceanospirillales;Saccharospirillaceae;Multi-affiliation;Multi-affiliation	OTU_896	0	0	0	1	0	0	1	0	0	1	0	0	0	0	0	0	0	0	0	0	0	0	0	0	1	0	0	0	0	0	0	0	278	0	1	0	91	0	0	0	0	0	0	0	1	0	0	0
Bacteria;Proteobacteria;Gammaproteobacteria;Oceanospirillales;Saccharospirillaceae;unknown genus;unknown species	OTU_36	11	6	3	7	1	6	8	4	2	10	6	2	8	3	4	7	2	2	6	9	7	2	3	3	11	11	1	0	4	0	1	0	15	0	8	0	9	6	7	9	11	13	1	7	8	20	6	6
Bacteria;Proteobacteria;Gammaproteobacteria;P0X4b2H11;unknown family;unknown genus;unknown species	OTU_869	0	0	0	0	0	0	0	0	0	0	1	0	1	0	0	0	0	0	481	0	0	0	0	0	1	0	0	0	0	0	0	0	0	0	0	0	0	0	1	0	0	0	0	0	0	1	0	0
Bacteria;Proteobacteria;Gammaproteobacteria;Pasteurellales;Pasteurellaceae;Haemophilus;Multi-affiliation	OTU_678	0	0	0	0	0	0	0	0	0	0	0	0	0	0	0	0	0	0	0	0	0	0	0	0	0	0	0	0	0	1	0	0	0	0	0	601	0	0	0	0	0	0	0	0	0	0	0	0
Bacteria;Proteobacteria;Gammaproteobacteria;Pasteurellales;Pasteurellaceae;Haemophilus;Multi-affiliation	OTU_802	0	1	0	1	0	1	1	0	0	1	0	1	0	0	0	0	0	0	0	1	0	543	318	0	2	1	0	0	0	0	0	0	0	0	0	0	0	0	1	0	0	2	0	0	1	2	0	0
Bacteria;Proteobacteria;Gammaproteobacteria;pItb-vmat-80;unknown family;unknown genus;unknown species	OTU_1385	1	0	0	0	0	0	0	0	0	0	0	0	0	0	0	0	234	0	1	0	1	0	0	0	1	0	0	0	0	0	0	0	0	1	0	0	0	0	0	1	0	0	0	0	0	0	0	0
Bacteria;Proteobacteria;Gammaproteobacteria;Pseudomonadales;Moraxellaceae;Acinetobacter;Multi-affiliation	OTU_116	2	2	0	0	300	1001	3	1	0	5	0	1	3	1	3	49	2	640	5	1	1	3	2	136	9	1	1	0	0	147	1977	0	4	2	3	0	0	3	1	1	2	1	1	3	1	2	2	3
Bacteria;Proteobacteria;Gammaproteobacteria;Pseudomonadales;Moraxellaceae;Acinetobacter;Multi-affiliation	OTU_154	5	0	0	1	0	3	2	1	1	0	1	1	3	0	1	0	2	1	0	3	0	3	2	0	1	0	0	0	1	0	2	0	1	0	66	0	363	3	1	0	1	1	2	1	1	3	3	1
Bacteria;Proteobacteria;Gammaproteobacteria;Pseudomonadales;Moraxellaceae;Acinetobacter;Multi-affiliation	OTU_194	3	1	2	1	0	1	4	0	0	3	0	0	2	1	1330	2	866	1	1	1	1	2	216	1	2	1	0	1	1	1	4	0	4	1	2	0	1	0	0	0	2	1	1	0	1	1	2	2
Bacteria;Proteobacteria;Gammaproteobacteria;Pseudomonadales;Moraxellaceae;Acinetobacter;Multi-affiliation	OTU_311	1	0	0	1	0	0	1	1	0	1	1	0	2	0	0	0	2	1	1	1	1	0	0	1	0	0	0	0	0	0	2	0	1	1	1540	0	2	1	0	1	0	1	0	1	2	0	1	2
Bacteria;Proteobacteria;Gammaproteobacteria;Pseudomonadales;Moraxellaceae;Acinetobacter;Multi-affiliation	OTU_460	3	0	164	2	0	1	0	4	0	2	1	1	0	0	0	0	1	1	508	206	0	2	0	0	4	0	6	0	0	1	4	0	0	2	1	1	264	0	2	0	1	2	3	0	0	0	1	0
Bacteria;Proteobacteria;Gammaproteobacteria;Pseudomonadales;Moraxellaceae;Acinetobacter;Multi-affiliation	OTU_697	1	0	0	0	0	0	0	0	0	0	0	0	1	0	0	0	0	0	0	1	0	0	1	0	0	0	1	0	0	0	0	0	0	0	0	0	0	661	0	0	0	0	1	0	0	0	0	1
Bacteria;Proteobacteria;Gammaproteobacteria;Pseudomonadales;Moraxellaceae;Acinetobacter;Multi-affiliation	OTU_934	0	0	0	1	0	3	0	0	0	0	0	0	0	1	0	0	0	0	0	0	0	0	430	0	1	0	0	0	1	0	0	0	0	0	0	0	0	1	0	0	0	0	0	0	0	0	2	0
Bacteria;Proteobacteria;Gammaproteobacteria;Pseudomonadales;Moraxellaceae;Acinetobacter;Multi-affiliation	OTU_1408	0	0	0	0	0	0	0	2	0	0	0	0	0	0	0	1	0	0	0	0	0	2	1	0	0	0	2	4	0	5	0	1	68	0	0	2	0	0	1	0	0	0	0	0	0	0	0	0
Bacteria;Proteobacteria;Gammaproteobacteria;Pseudomonadales;Moraxellaceae;Acinetobacter;unknown species	OTU_279	0	0	265	0	0	0	0	0	0	0	0	0	1	1	0	0	0	0	2	2	0	0	1	0	0	0	10	1	0	1256	1	0	0	0	0	1	238	0	0	0	0	1	0	0	0	0	0	0
Bacteria;Proteobacteria;Gammaproteobacteria;Pseudomonadales;Moraxellaceae;Multi-affiliation;Multi-affiliation	OTU_628	0	0	0	0	0	1	0	0	0	0	1	0	1	1	542	0	1	0	0	0	0	2	0	0	0	0	0	0	0	0	0	0	0	2	0	0	196	0	0	0	2	1	0	0	2	1	1	0
Bacteria;Proteobacteria;Gammaproteobacteria;Pseudomonadales;Pseudomonadaceae;Pseudomonas;Multi-affiliation	OTU_15	8053	369	326	283	7	23	591	163	6	212	598	1649	225	336	8	60	1488	815	987	549	1641	21	22	198	238	13	1286	2	712	2197	4786	0	124	2042	2985	1	233	808	38	25	11	26	15	24	17	22	12	21
Bacteria;Proteobacteria;Gammaproteobacteria;Pseudomonadales;Pseudomonadaceae;Pseudomonas;Multi-affiliation	OTU_103	1042	2	233	5	318	1809	5	141	1	2	2	4	6	3	2	5	150	2	6	9	6	750	865	2	1	3	13	0	5	0	7	0	2	2	7	0	138	4	2	3	4	2	5	4	3	6	4	2
Bacteria;Proteobacteria;Gammaproteobacteria;Pseudomonadales;Pseudomonadaceae;Pseudomonas;Multi-affiliation	OTU_146	4	0	2	3	0	2	2	5	0	4	3	3	219	2	702	2	3	601	6	4	0	2	4	0	4	1	1	2	3	0	1686	0	1	2	5	0	2	3	3	1	3	1	0	1	1	1	0	1
Bacteria;Proteobacteria;Gammaproteobacteria;Pseudomonadales;Pseudomonadaceae;Pseudomonas;Multi-affiliation	OTU_229	4	2	1	1	0	5	1	140	1	2	1	2	1	2	3	2	0	7	1	3	1	0	3	0	0	0	1	0	1358	0	20	0	4	0	4	0	1	555	1	1	0	2	2	1	1	0	1	2
Bacteria;Proteobacteria;Gammaproteobacteria;Pseudomonadales;Pseudomonadaceae;Pseudomonas;Multi-affiliation	OTU_378	33	2	3	0	0	1	0	0	0	1	0	5	0	2	0	0	1	7	2	2	4	0	0	1	0	2	1	0	2	0	19	0	1	5	1443	0	1	4	0	1	0	1	0	0	1	1	1	1
Bacteria;Proteobacteria;Gammaproteobacteria;Pseudomonadales;Pseudomonadaceae;Pseudomonas;Multi-affiliation	OTU_473	0	1	0	1	0	2	1	0	0	0	1	1	0	0	0	0	1	2	0	2	0	0	1	0	1	0	14	0	785	0	0	0	1	0	1	0	324	0	1	0	0	1	0	0	0	0	1	0
Bacteria;Proteobacteria;Gammaproteobacteria;Pseudomonadales;Pseudomonadaceae;Pseudomonas;Multi-affiliation	OTU_619	0	0	0	1	0	2	1	0	0	1	0	645	0	123	0	0	0	0	1	0	0	0	0	0	2	0	0	0	2	0	0	0	1	1	2	0	0	0	0	0	0	1	0	1	1	0	0	0
Bacteria;Proteobacteria;Gammaproteobacteria;Pseudomonadales;Pseudomonadaceae;Pseudomonas;Multi-affiliation	OTU_820	0	0	0	0	0	1	0	0	0	0	0	0	0	518	1	0	1	0	0	1	1	2	0	0	1	1	0	0	1	0	0	0	0	0	0	0	0	0	0	0	0	0	0	1	1	0	2	1
Bacteria;Proteobacteria;Gammaproteobacteria;Pseudomonadales;Pseudomonadaceae;Pseudomonas;Multi-affiliation	OTU_951	101	1	2	1	1	8	0	7	5	2	6	33	1	4	0	0	10	17	22	10	34	6	5	4	3	5	5	0	33	1	21	0	1	26	26	0	2	8	1	0	0	0	0	0	1	0	0	0
Bacteria;Proteobacteria;Gammaproteobacteria;Pseudomonadales;Pseudomonadaceae;Pseudomonas;Pseudomonas sp.	OTU_475	1	0	0	1	0	1	0	0	0	1	1	0	0	1	0	0	0	1	1	0	0	0	1	0	1	0	0	0	2	0	0	0	1	0	1110	0	1	1	1	0	0	0	1	1	0	0	0	0
Bacteria;Proteobacteria;Gammaproteobacteria;Pseudomonadales;Pseudomonadaceae;Pseudomonas;Pseudomonas sp.	OTU_1003	107	1	1	3	0	0	3	3	0	1	8	23	2	9	0	0	17	13	17	6	40	0	1	1	3	1	12	0	7	0	28	0	0	30	29	0	0	5	1	0	0	0	0	1	0	0	0	0
Bacteria;Proteobacteria;Gammaproteobacteria;SAR86 clade;unknown family;unknown genus;marine metagenome	OTU_495	0	0	0	1	0	0	0	0	0	1	0	0	0	0	0	0	0	0	1	0	1	0	0	1	1	0	0	0	0	0	1	0	1	2	1	0	0	0	0	0	1	1	0	1	0	0	0	0
Bacteria;Proteobacteria;Gammaproteobacteria;SAR86 clade;unknown family;unknown genus;marine metagenome	OTU_1268	1	0	0	0	0	3	1	0	0	0	0	0	0	0	0	0	0	0	0	0	0	0	0	0	0	0	0	0	0	0	0	0	11	0	0	0	0	1	0	0	0	0	0	0	0	0	0	0
Bacteria;Proteobacteria;Gammaproteobacteria;SAR86 clade;unknown family;unknown genus;Multi-affiliation	OTU_66	6	0	5	4	0	4	1	6	3	2	0	3	5	4	1	1	2	3	4	7	3	1	3	5	11	3	0	0	1	0	5	0	7	3	8	0	8	5	3	3	8	5	3	7	4	7	6	6
Bacteria;Proteobacteria;Gammaproteobacteria;SAR86 clade;unknown family;unknown genus;Multi-affiliation	OTU_391	1	0	2	0	0	1	1	1	1	0	1	0	1	0	1	1	1	2	0	0	1	2	1	0	1	0	0	0	0	0	0	0	0	0	0	0	1	0	0	1	0	2	0	0	1	0	0	1
Bacteria;Proteobacteria;Gammaproteobacteria;SAR86 clade;unknown family;unknown genus;Multi-affiliation	OTU_467	1	1	0	0	0	1	1	0	0	1	2	1	1	0	0	1	1	0	0	2	0	0	0	0	1	1	1	0	2	0	0	0	1	0	0	0	1	1	2	2	0	5	1	4	2	2	1	1
Bacteria;Proteobacteria;Gammaproteobacteria;SAR86 clade;unknown family;unknown genus;unknown species	OTU_165	0	1	2	0	1	2	2	1	0	0	2	0	0	0	1	2	2	0	3	1	0	0	2	0	4	1	0	0	1	0	3	0	0	1	1	0	2	2	1	1	2	7	2	1	2	0	2	3
Bacteria;Proteobacteria;Gammaproteobacteria;SAR86 clade;unknown family;unknown genus;unknown species	OTU_322	2	1	0	0	0	0	0	1	0	0	0	1	0	1	0	0	0	1	0	1	0	0	2	0	1	0	1	0	0	0	0	0	0	2	1	0	0	1	0	0	0	0	1	0	0	0	2	2
Bacteria;Proteobacteria;Gammaproteobacteria;SAR86 clade;unknown family;unknown genus;unknown species	OTU_350	2	0	0	0	0	0	0	0	0	0	0	0	0	0	0	1	0	1	0	0	1	0	0	0	2	0	0	0	0	0	1	0	0	1	0	0	0	1	0	0	1	0	1	0	0	0	1	3
Bacteria;Proteobacteria;Gammaproteobacteria;SAR86 clade;unknown family;unknown genus;unknown species	OTU_670	1	0	0	0	0	0	0	0	0	0	1	0	0	0	0	0	0	0	0	0	0	2	0	0	1	0	0	0	0	0	0	0	0	0	0	0	0	0	0	0	0	2	0	0	1	0	0	1
Bacteria;Proteobacteria;Gammaproteobacteria;SAR86 clade;unknown family;unknown genus;unknown species	OTU_815	0	0	0	0	1	0	0	0	0	1	0	0	0	0	0	0	0	0	0	0	0	0	0	0	1	0	0	0	0	0	0	0	0	0	0	0	0	0	0	0	0	1	0	0	0	2	0	0
Bacteria;Proteobacteria;Gammaproteobacteria;SAR86 clade;unknown family;unknown genus;unknown species	OTU_1315	0	0	0	0	0	0	0	0	0	0	0	0	0	0	0	0	1	0	0	0	0	1	0	0	0	0	0	0	0	0	0	0	0	0	0	0	0	0	0	0	0	0	0	0	2	1	0	0
Bacteria;Proteobacteria;Gammaproteobacteria;Steroidobacterales;Steroidobacteraceae;Steroidobacter;unknown species	OTU_961	1	1	0	2	0	0	0	0	0	0	0	1	0	0	0	0	0	0	1	0	0	1	2	0	0	0	0	0	0	0	0	0	0	0	0	0	0	0	0	0	1	0	0	1	1	0	0	0
Bacteria;Proteobacteria;Gammaproteobacteria;Steroidobacterales;Woeseiaceae;Woeseia;unknown species	OTU_996	0	0	0	0	0	0	0	1	0	0	0	0	0	0	0	0	0	0	0	1	0	0	0	0	0	0	0	0	0	0	0	0	0	0	0	0	0	0	8	20	18	8	16	2	3	3	119	142
Bacteria;Proteobacteria;Gammaproteobacteria;Steroidobacterales;Woeseiaceae;Woeseia;unknown species	OTU_1010	0	0	0	0	0	0	0	0	0	0	0	0	1	0	0	0	1	0	0	0	0	0	0	0	0	1	0	0	1	0	0	0	0	0	0	0	0	0	91	147	198	3	3	0	3	0	3	8
Bacteria;Proteobacteria;Gammaproteobacteria;Tenderiales;Tenderiaceae;Candidatus Tenderia;Candidatus Tenderia electrophaga	OTU_727	0	0	0	0	0	1	1	1	0	0	0	0	0	0	0	0	0	0	0	0	0	0	0	0	0	0	0	0	0	0	0	0	0	0	1	0	0	0	164	159	151	87	1	0	0	2	1	0
Bacteria;Proteobacteria;Gammaproteobacteria;Tenderiales;Tenderiaceae;Candidatus Tenderia;Candidatus Tenderia electrophaga	OTU_804	0	0	0	0	0	0	0	0	0	0	0	0	0	0	0	0	0	0	0	0	1	0	0	0	0	0	0	0	0	0	0	0	0	1	1	0	0	1	168	123	163	1	0	2	0	2	0	0
Bacteria;Proteobacteria;Gammaproteobacteria;Tenderiales;Tenderiaceae;Candidatus Tenderia;Candidatus Tenderia electrophaga	OTU_1269	1	0	0	0	0	1	0	0	0	0	0	0	0	0	0	0	0	0	0	0	0	0	0	0	1	0	0	0	0	0	0	0	0	0	0	0	1	0	69	86	77	1	1	0	0	0	0	0
Bacteria;Proteobacteria;Gammaproteobacteria;Tenderiales;Tenderiaceae;Candidatus Tenderia;Multi-affiliation	OTU_1218	0	0	0	0	0	0	2	0	0	0	0	0	0	0	0	1	0	0	0	0	0	0	0	0	0	0	0	0	0	0	0	0	0	0	0	0	0	0	77	44	123	7	0	0	0	0	0	2
Bacteria;Proteobacteria;Gammaproteobacteria;Thiohalorhabdales;Thiohalorhabdaceae;unknown genus;unknown species	OTU_899	0	0	0	0	0	1	1	0	0	0	0	0	0	0	0	0	0	0	0	1	0	0	0	1	0	0	1	0	0	0	0	0	0	0	0	0	0	1	46	69	98	6	12	54	66	60	8	15
Bacteria;Proteobacteria;Gammaproteobacteria;Thiomicrospirales;Thioglobaceae;SUP05 cluster;unknown species	OTU_482	1	2	1	0	0	1	1	0	0	0	3	0	1	0	0	0	2	0	0	1	1	2	0	1	2	0	1	0	0	0	0	0	2	0	2	0	1	0	1	0	1	0	1	0	3	1	0	2
Bacteria;Proteobacteria;Gammaproteobacteria;Thiomicrospirales;Thiomicrospiraceae;endosymbionts;endosymbiont of Alviniconcha sp. type1	OTU_1071	1	0	0	0	0	0	0	0	0	0	0	0	0	0	0	2	0	0	0	0	0	0	1	0	1	1	0	0	0	0	0	0	0	0	0	0	0	0	73	99	138	3	1	2	0	0	1	0
Bacteria;Proteobacteria;Gammaproteobacteria;Thiomicrospirales;Thiomicrospiraceae;endosymbionts;unknown species	OTU_246	1	0	0	1	0	1	0	0	0	0	0	0	0	1	0	0	0	0	1	0	1	0	0	0	0	0	0	0	2	0	3	0	2	1	1	0	1	1	660	412	852	21	25	0	0	2	1	1
Bacteria;Proteobacteria;Gammaproteobacteria;Thiomicrospirales;Thiomicrospiraceae;endosymbionts;unknown species	OTU_271	2	1	1	274	0	2	2	2	2	0	1	0	2	0	0	2	1	0	0	1	0	0	0	2	4	1	3	0	0	0	1	0	0	0	2	0	0	0	219	259	235	85	106	389	403	393	1	2
Bacteria;Proteobacteria;Gammaproteobacteria;Thiomicrospirales;Thiomicrospiraceae;endosymbionts;unknown species	OTU_283	1	247	0	1	0	2	215	135	200	3	178	3	206	318	0	147	1	2	0	1	0	2	2	0	1	0	0	0	1	0	1	0	3	0	1	0	2	1	3	0	0	1	1	37	44	31	0	1
Bacteria;Proteobacteria;Gammaproteobacteria;Thiomicrospirales;Thiomicrospiraceae;endosymbionts;unknown species	OTU_497	0	0	1	1	0	0	0	0	1	0	0	0	0	0	0	0	0	0	1	0	2	0	2	0	0	0	0	0	1	0	1	0	0	1	1	0	1	2	267	338	430	3	1	0	0	0	0	0
Bacteria;Proteobacteria;Gammaproteobacteria;Thiomicrospirales;Thiomicrospiraceae;endosymbionts;unknown species	OTU_533	0	0	1	2	0	0	0	0	1	1	0	0	1	0	0	0	0	0	0	0	0	0	1	1	2	0	0	0	0	0	0	0	0	1	1	0	0	0	446	330	388	51	91	41	21	21	1	2
Bacteria;Proteobacteria;Gammaproteobacteria;Thiomicrospirales;Thiomicrospiraceae;endosymbionts;unknown species	OTU_552	0	0	0	0	0	0	0	0	0	0	0	1	0	0	0	0	0	0	0	926	2	0	1	0	1	0	0	0	0	0	0	0	0	0	1	0	0	0	3	0	2	0	0	0	3	1	0	0
Bacteria;Proteobacteria;Gammaproteobacteria;Thiomicrospirales;Thiomicrospiraceae;endosymbionts;unknown species	OTU_705	1	0	0	0	0	0	0	0	0	0	0	0	1	0	0	0	0	0	0	0	0	0	0	1	1	0	0	0	0	0	0	0	0	0	0	0	1	0	142	137	102	80	164	3	3	4	0	0
Bacteria;Proteobacteria;Gammaproteobacteria;Thiomicrospirales;Thiomicrospiraceae;endosymbionts;unknown species	OTU_827	0	0	1	1	0	0	0	0	0	0	0	1	0	1	0	0	1	0	0	1	0	0	0	0	0	0	0	0	0	0	1	0	0	1	0	0	0	0	47	103	32	21	262	0	1	0	1	0
Bacteria;Proteobacteria;Gammaproteobacteria;Thiomicrospirales;Thiomicrospiraceae;endosymbionts;unknown species	OTU_1007	1	0	0	1	0	0	0	0	0	0	0	0	0	0	1	0	1	0	0	0	1	0	0	0	0	206	0	0	0	0	0	0	0	0	0	0	0	0	5	9	7	10	8	47	61	63	0	2
Bacteria;Proteobacteria;Gammaproteobacteria;Thiomicrospirales;Thiomicrospiraceae;Thiomicrorhabdus;marine metagenome	OTU_825	0	0	0	0	0	1	0	1	0	1	0	1	1	0	0	2	0	0	1	0	1	0	0	0	0	0	0	0	0	0	1	0	1	0	0	0	0	0	0	0	0	0	0	0	0	0	0	0
Bacteria;Proteobacteria;Gammaproteobacteria;Thiomicrospirales;Thiomicrospiraceae;Thiomicrorhabdus;unknown species	OTU_598	1	0	0	1	0	0	0	1	1	0	0	0	1	1	0	0	0	0	0	0	1	0	0	0	0	0	0	0	0	0	0	0	1	0	0	0	0	0	0	0	0	1	0	0	0	0	1	0
Bacteria;Proteobacteria;Gammaproteobacteria;Thiotrichales;Thiotrichaceae;Cocleimonas;unknown species	OTU_419	0	0	1	0	0	0	1	0	0	0	0	0	0	0	0	0	0	0	0	1	0	0	0	1124	0	1	0	0	1	0	0	0	0	1	2	0	1	0	4	5	7	10	15	36	46	45	0	0
Bacteria;Proteobacteria;Gammaproteobacteria;Thiotrichales;Thiotrichaceae;Cocleimonas;unknown species	OTU_561	0	0	0	0	0	0	0	0	0	0	1	1	1	0	0	1	0	0	0	0	0	0	271	387	4	0	0	0	1	0	1	0	0	0	0	0	0	0	0	0	0	0	1	92	89	64	1	1
Bacteria;Proteobacteria;Gammaproteobacteria;Thiotrichales;Thiotrichaceae;Multi-affiliation;Multi-affiliation	OTU_943	0	1	0	0	0	1	1	0	0	0	1	1	0	0	0	0	0	0	0	0	0	0	0	0	0	0	0	0	0	0	0	0	1	0	0	0	1	0	0	0	0	1	1	133	117	133	0	0
Bacteria;Proteobacteria;Gammaproteobacteria;Thiotrichales;Thiotrichaceae;unknown genus;unknown species	OTU_712	0	0	0	0	0	0	0	1	0	0	0	0	0	0	0	0	0	617	0	0	0	0	0	0	0	0	0	0	0	0	0	0	0	1	0	0	0	0	12	26	13	0	1	1	1	1	0	0
Bacteria;Proteobacteria;Gammaproteobacteria;Thiotrichales;Thiotrichaceae;unknown genus;unknown species	OTU_716	0	0	0	0	0	0	1	1	0	0	0	0	1	0	0	0	1	0	0	0	0	1	0	0	0	0	0	0	0	0	0	0	0	1	0	0	0	0	214	175	98	44	31	6	3	10	1	0
Bacteria;Proteobacteria;Gammaproteobacteria;Thiotrichales;Thiotrichaceae;unknown genus;unknown species	OTU_777	1	0	0	0	0	0	1	488	0	1	0	0	0	0	0	0	0	0	0	0	0	0	0	0	0	0	0	0	0	0	0	0	0	0	1	0	1	0	0	0	0	0	0	11	3	10	0	2
Bacteria;Proteobacteria;Gammaproteobacteria;Thiotrichales;Thiotrichaceae;unknown genus;unknown species	OTU_982	0	1	0	0	0	0	0	0	0	1	0	0	0	0	0	0	0	0	0	1	0	0	0	0	0	0	0	0	0	0	0	0	1	0	0	0	0	400	0	0	0	0	0	0	0	0	0	0
Bacteria;Proteobacteria;Gammaproteobacteria;Thiotrichales;Thiotrichaceae;unknown genus;unknown species	OTU_1047	0	0	0	0	0	0	0	0	0	0	0	0	0	0	0	0	0	0	0	0	0	0	0	0	0	0	0	0	0	0	0	0	0	0	1	0	0	0	114	118	76	12	14	2	1	1	0	0
Bacteria;Proteobacteria;Gammaproteobacteria;Thiotrichales;Thiotrichaceae;unknown genus;unknown species	OTU_1233	0	0	0	1	0	0	0	0	0	1	0	0	0	0	0	0	0	0	0	0	0	1	0	0	0	0	0	0	0	0	0	0	0	0	0	0	0	0	119	117	203	7	7	0	0	1	0	0
Bacteria;Proteobacteria;Gammaproteobacteria;Thiotrichales;Thiotrichaceae;unknown genus;unknown species	OTU_1265	0	1	0	0	0	0	0	0	0	0	0	0	0	0	0	0	0	0	0	0	0	0	0	0	0	0	0	0	0	0	2	0	0	0	0	0	0	0	55	65	68	3	5	12	18	14	0	1
Bacteria;Proteobacteria;Gammaproteobacteria;Thiotrichales;Thiotrichaceae;unknown genus;unknown species	OTU_1276	1	1	0	0	0	0	2	0	0	0	0	0	0	0	0	0	0	0	0	1	1	0	0	0	0	0	0	0	0	0	0	0	0	0	0	0	0	0	0	1	0	0	0	0	0	2	0	0
Bacteria;Proteobacteria;Gammaproteobacteria;Thiotrichales;Thiotrichaceae;unknown genus;unknown species	OTU_1443	0	0	0	1	0	0	0	0	0	0	0	0	0	0	0	0	0	0	0	0	0	0	0	0	0	0	0	0	0	0	0	0	0	0	0	0	0	0	2	5	3	115	69	0	0	0	16	17
Bacteria;Proteobacteria;Gammaproteobacteria;UBA10353 marine group;unknown family;unknown genus;unknown species	OTU_733	0	0	0	0	0	1	0	1	0	0	0	0	1	0	0	0	0	0	1	0	0	463	123	0	2	0	0	0	0	0	1	0	1	0	0	0	0	0	0	2	1	4	5	2	1	1	6	3
Bacteria;Proteobacteria;Gammaproteobacteria;UBA10353 marine group;unknown family;unknown genus;unknown species	OTU_1172	0	0	0	1	0	0	1	0	0	0	0	1	77	0	0	0	0	0	0	0	0	0	0	0	1	0	0	0	0	0	0	0	0	0	1	0	0	0	22	55	15	14	53	2	1	2	4	6
Bacteria;Proteobacteria;Gammaproteobacteria;unknown order;unknown family;unknown genus;unknown species	OTU_231	1	0	3	0	0	2	2	0	1	1	4	0	0	0	0	0	0	1	1	0	1	3	0	1	0	1	6	0	1	0	1	0	2	1	1	0	0	0	39	50	51	6	9	5	7	2	2	1
Bacteria;Proteobacteria;Gammaproteobacteria;unknown order;unknown family;unknown genus;unknown species	OTU_582	0	0	0	0	0	1	1	0	0	845	0	0	0	1	0	1	0	0	0	0	1	0	0	0	1	0	0	0	0	0	1	0	0	0	0	0	0	0	0	0	0	0	0	0	1	0	0	0
Bacteria;Proteobacteria;Gammaproteobacteria;unknown order;unknown family;unknown genus;unknown species	OTU_787	1	0	0	0	1	0	1	1	0	0	0	0	0	451	0	1	0	536	1	0	0	0	1	0	1	0	0	0	2	0	2	0	1	0	0	0	0	0	0	0	0	1	1	3	3	2	1	1
Bacteria;Proteobacteria;Gammaproteobacteria;unknown order;unknown family;unknown genus;unknown species	OTU_918	0	0	0	0	0	1	0	0	0	0	0	0	0	0	0	0	0	0	0	0	1	455	0	0	0	0	0	0	0	0	0	0	0	0	0	0	0	0	1	2	1	2	2	2	0	0	0	0
Bacteria;Proteobacteria;Gammaproteobacteria;Vibrionales;Vibrionaceae;Aliivibrio;Multi-affiliation	OTU_1138	0	0	0	0	0	0	0	0	266	0	0	2	0	0	0	1	0	0	0	0	0	0	0	0	0	0	0	0	0	0	0	0	1	0	0	0	0	0	0	0	2	6	9	3	0	1	0	1
Bacteria;Proteobacteria;Gammaproteobacteria;Vibrionales;Vibrionaceae;Enterovibrio;Enterovibrio sp.	OTU_849	0	0	0	0	0	1	0	0	0	1	0	0	0	0	0	0	0	0	0	0	0	0	0	0	1	0	1	0	0	0	0	0	0	0	0	0	1	0	0	0	0	2	6	1	2	0	2	3
Bacteria;Proteobacteria;Gammaproteobacteria;Vibrionales;Vibrionaceae;Vibrio;Multi-affiliation	OTU_86	8	2	1	0	2	3	4	88	435	1	2	4	4	1	0	101	2	2	5	3	2	0	3	1	7	1	1	0	2	0	5	0	5287	2	3	0	119	57	2	5	3	9	11	5	9	11	5	12
Bacteria;Proteobacteria;Gammaproteobacteria;Vibrionales;Vibrionaceae;Vibrio;Multi-affiliation	OTU_113	3	1	1	3	1	3	5	1	873	0	2	2	1	2	0	1	2	0	0	4	1	2	2	2	4	0	0	0	0	0	2	0	1803	1	1	0	489	952	0	3	7	3	3	2	4	1	5	2
Bacteria;Proteobacteria;Gammaproteobacteria;Vibrionales;Vibrionaceae;Vibrio;Multi-affiliation	OTU_470	0	0	1	0	0	1	1	1	0	1	1070	0	2	0	0	1	0	0	2	1	0	0	3	0	1	0	0	0	1	0	0	0	19	1	2	0	1	1	1	0	0	1	8	4	3	3	2	2
Bacteria;Proteobacteria;Gammaproteobacteria;Vibrionales;Vibrionaceae;Vibrio;Multi-affiliation	OTU_506	2	1	0	0	0	116	0	0	0	0	1	1	1	0	0	0	0	0	0	0	0	1	0	1	0	0	0	0	0	0	0	0	872	0	1	0	1	1	0	1	0	3	0	1	0	1	0	1
Bacteria;Proteobacteria;Gammaproteobacteria;Vibrionales;Vibrionaceae;Vibrio;Multi-affiliation	OTU_511	0	1	1	1	0	0	0	0	0	1	0	0	1	0	1	1	0	0	0	1	0	1	1	0	1	0	0	0	0	0	1	0	919	0	0	0	96	0	0	1	1	1	1	0	0	0	1	0
Bacteria;Proteobacteria;Gammaproteobacteria;Vibrionales;Vibrionaceae;Vibrio;Multi-affiliation	OTU_551	0	1	0	1	0	0	0	0	0	1	2	0	0	0	0	0	0	0	0	0	0	1	0	0	1	1	0	0	0	0	0	0	0	1	0	0	0	0	3	5	9	8	19	2	11	5	18	16
Bacteria;Proteobacteria;Gammaproteobacteria;Vibrionales;Vibrionaceae;Vibrio;Multi-affiliation	OTU_840	0	0	0	0	0	0	0	0	1	0	3	0	1	0	0	0	0	0	0	0	0	0	0	0	1	0	1	0	0	0	0	0	1	0	0	0	0	0	0	0	0	0	0	1	0	0	25	22
Bacteria;Proteobacteria;Gammaproteobacteria;Vibrionales;Vibrionaceae;Vibrio;Multi-affiliation	OTU_919	0	0	1	0	0	0	0	0	0	0	2	0	2	0	0	0	0	1	1	0	0	0	0	0	1	0	0	0	1	0	0	0	17	0	1	0	0	0	7	5	5	11	13	4	9	8	15	6
Bacteria;Proteobacteria;Gammaproteobacteria;Vibrionales;Vibrionaceae;Vibrio;Multi-affiliation	OTU_981	1	1	0	1	0	0	1	1	0	0	0	0	1	0	0	0	0	1	0	0	0	2	0	0	0	0	0	0	1	0	2	0	0	0	0	0	2	1	0	0	2	5	3	0	0	3	3	1
Bacteria;Proteobacteria;Gammaproteobacteria;Vibrionales;Vibrionaceae;Vibrio;Multi-affiliation	OTU_2079	0	0	0	0	0	1	1	0	0	0	1	0	0	0	0	0	0	0	0	0	0	0	1	0	0	0	0	0	0	0	0	0	246	0	0	0	0	1	0	3	2	0	4	0	0	0	3	0
Bacteria;Proteobacteria;Gammaproteobacteria;Vibrionales;Vibrionaceae;Vibrio;Vibrio fortis	OTU_415	0	1	0	0	0	1	0	1	0	0	1	1	1	0	1	0	0	1	0	1	0	0	0	0	1	0	0	0	2	0	0	0	1291	0	0	0	0	0	0	1	0	0	0	0	0	0	1	2
Bacteria;Proteobacteria;Gammaproteobacteria;Vibrionales;Vibrionaceae;Vibrio;Vibrio fortis	OTU_1035	0	0	1	0	0	0	0	0	0	1	0	0	1	0	0	0	0	0	0	0	0	0	0	0	0	0	0	0	2	0	0	0	282	0	0	0	110	0	2	1	0	0	0	0	0	1	0	0
Bacteria;Proteobacteria;Gammaproteobacteria;Vibrionales;Vibrionaceae;Vibrio;Vibrio kanaloae	OTU_591	0	0	1	0	0	0	1	0	0	0	2	0	0	0	1	0	0	0	0	1	0	837	0	0	0	0	0	0	0	0	0	0	1	0	1	0	1	0	0	1	0	1	1	0	0	0	0	0
Bacteria;Proteobacteria;Gammaproteobacteria;Vibrionales;Vibrionaceae;Vibrio;Vibrio sp.	OTU_303	0	2	0	0	2	1	0	1	0	1	1	2	1	1	2	0	1	0	0	2	1	0	0	1	0	2	0	0	1	0	0	0	1773	1	1	0	1	0	4	2	6	1	2	0	0	1	0	0
Bacteria;Proteobacteria;Gammaproteobacteria;Vibrionales;Vibrionaceae;Vibrio;Vibrio sp.	OTU_703	1	1	0	0	0	0	0	2	123	0	1	0	0	0	0	0	0	0	0	0	1	0	0	1	1	0	0	0	0	0	0	0	508	1	0	0	1	0	0	0	2	0	1	0	0	0	1	1
Bacteria;Proteobacteria;Gammaproteobacteria;Vibrionales;Vibrionaceae;Vibrio;Vibrio sp.	OTU_932	0	0	0	0	0	1	0	1	0	1	1	0	0	0	0	0	410	0	0	0	0	0	1	1	1	0	0	0	0	0	0	0	26	0	0	0	0	1	0	0	0	0	0	0	0	0	1	2
Bacteria;Proteobacteria;Gammaproteobacteria;Xanthomonadales;Xanthomonadaceae;Pseudoxanthomonas;Pseudoxanthomonas sp.	OTU_692	0	1	1	2	0	1	288	0	0	0	1	0	0	0	1	0	0	0	0	0	0	1	0	0	1	0	0	1	2	369	0	1	1	0	0	1	0	1	0	0	0	0	0	0	0	1	2	0
Bacteria;Proteobacteria;Gammaproteobacteria;Xanthomonadales;Xanthomonadaceae;Stenotrophomonas;Multi-affiliation	OTU_272	0	0	0	0	0	0	0	0	0	0	0	0	0	0	0	0	0	0	0	0	0	0	0	0	0	0	0	0	0	0	0	1181	0	0	0	582	0	0	0	0	0	0	0	0	0	0	0	0
Bacteria;Proteobacteria;Zetaproteobacteria;Mariprofundales;Mariprofundaceae;Mariprofundus;Multi-affiliation	OTU_94	1	4	2	3	2	5	3	3	2	3	3	1	5	1	1	0	1	1	2	5	1	2	0	0	4	1	0	0	2	0	1	0	7	1	2	0	2	2	5	2	2	40	70	3	3	6	1409	1047
Bacteria;Proteobacteria;Zetaproteobacteria;Mariprofundales;Mariprofundaceae;Mariprofundus;Multi-affiliation	OTU_125	1	1	1	2	1	2	0	6	2	1	1	1	3	0	2	2	0	2	3	1	1	1	1	2	3	0	0	0	0	0	3	0	233	4	2	0	2	0	23	22	2	34	93	1	3	1	1312	881
Bacteria;Proteobacteria;Zetaproteobacteria;Mariprofundales;Mariprofundaceae;Mariprofundus;Multi-affiliation	OTU_513	0	0	1	0	0	2	1	1	0	1	0	0	1	0	0	0	0	0	2	0	1	1	0	0	1	0	0	0	1	0	1	0	0	0	0	0	1	1	8	14	1	15	68	0	0	0	332	237
Bacteria;Proteobacteria;Zetaproteobacteria;Mariprofundales;Mariprofundaceae;Mariprofundus;unknown species	OTU_606	0	0	0	0	0	0	0	0	0	0	0	1	0	0	0	0	0	0	0	1	0	0	1	0	0	2	0	0	0	0	0	0	3	0	0	0	0	0	23	14	3	17	68	1	3	2	317	186
Bacteria;Proteobacteria;Zetaproteobacteria;Mariprofundales;Mariprofundaceae;Mariprofundus;unknown species	OTU_967	0	0	0	0	0	0	0	0	0	1	0	0	0	0	0	0	0	0	0	0	0	1	0	0	0	0	0	0	0	0	1	0	1	0	0	0	1	0	0	1	0	3	18	0	1	1	172	101
Bacteria;Proteobacteria;Zetaproteobacteria;Mariprofundales;Mariprofundaceae;Mariprofundus;unknown species	OTU_1165	1	0	0	0	0	0	0	1	0	0	0	0	0	0	0	0	0	0	0	1	0	0	0	0	0	1	0	0	0	0	0	0	1	0	0	0	1	0	0	0	5	2	1	0	0	0	103	96
Bacteria;Spirochaetes;Spirochaetia;Brevinematales;Brevinemataceae;Brevinema;unknown species	OTU_210	4	0	0	2	0	1	1	0	0	0	1	0	0	0	0	1	0	1	0	3213	1	1	0	1	0	0	0	0	0	0	0	0	0	1	2	0	1	0	0	0	0	0	0	0	0	0	0	1
Bacteria;Spirochaetes;Spirochaetia;Brevinematales;Brevinemataceae;Brevinema;unknown species	OTU_366	0	0	0	0	0	0	1	0	1	0	0	0	1	0	0	0	0	0	0	1674	0	0	0	0	0	0	0	0	0	0	1	0	1	0	0	0	0	0	0	1	0	0	0	0	0	0	0	0
Bacteria;Spirochaetes;Spirochaetia;Brevinematales;Brevinemataceae;Brevinema;unknown species	OTU_413	0	0	0	0	0	3	0	0	0	0	0	1	0	0	0	1	0	0	0	1302	0	1	0	1	0	0	0	0	0	0	0	0	0	0	0	0	1	0	0	0	1	0	0	0	0	0	0	0
Bacteria;Spirochaetes;Spirochaetia;Spirochaetales;Spirochaetaceae;Sediminispirochaeta;unknown species	OTU_87	0	1	2	1	0	0	1	0	0	329	628	0	0	0	1	0	0	3	1347	1	2	6	0	417	1	2	1	0	2	0	1	0	1	0	0	0	1	0	0	2	5	0	1	1201	1081	956	3	4
Bacteria;Spirochaetes;Spirochaetia;Spirochaetales;Spirochaetaceae;Spirochaeta 2;Multi-affiliation	OTU_707	0	0	0	0	0	0	0	0	0	0	0	0	0	0	0	1	1	0	0	1	0	1	0	627	0	0	0	0	0	0	0	0	0	0	0	0	0	0	0	0	1	0	1	16	13	11	0	0
Bacteria;Spirochaetes;Spirochaetia;Spirochaetales;Spirochaetaceae;Spirochaeta 2;Spirochaeta isovalerica	OTU_286	1	0	132	279	0	0	0	0	0	0	1007	0	0	0	0	1	0	0	1	0	0	0	0	0	1	0	10	0	0	0	0	0	0	1	0	0	1	0	0	0	1	2	2	150	92	140	0	0
Bacteria;Spirochaetes;Spirochaetia;Spirochaetales;Spirochaetaceae;Spirochaeta 2;unknown species	OTU_184	0	0	2	2	0	1	0	0	0	0	0	0	0	0	0	1	0	2582	0	1	0	0	0	0	0	0	0	0	0	0	1	0	0	0	1	0	1	0	2	0	1	0	0	7	3	2	0	0
Bacteria;Spirochaetes;Spirochaetia;Spirochaetales;Spirochaetaceae;Spirochaeta 2;unknown species	OTU_389	0	1	1	1	0	0	0	1	0	0	1	1	0	0	2	0	572	2	1	0	0	0	801	0	0	0	1	0	0	0	1	0	0	2	1	0	0	1	0	1	0	5	4	149	146	97	2	0
Bacteria;Spirochaetes;Spirochaetia;Spirochaetales;Spirochaetaceae;Spirochaeta 2;unknown species	OTU_530	1	0	747	534	0	1	1	0	1	0	0	1	0	0	1	0	0	1	1	1	0	2	0	0	0	1	35	0	0	0	0	0	0	1	1	0	1	1	0	1	0	0	1	21	11	14	0	1
Bacteria;Spirochaetes;Spirochaetia;Spirochaetales;Spirochaetaceae;Spirochaeta 2;unknown species	OTU_964	0	0	0	0	0	0	0	0	0	0	0	0	0	0	0	1	0	0	0	0	0	0	0	1	0	0	0	0	0	0	0	0	0	0	0	0	0	0	0	0	0	2	0	153	101	144	0	0
Bacteria;Spirochaetes;Spirochaetia;Spirochaetales;Spirochaetaceae;Spirochaeta 2;unknown species	OTU_1258	0	0	1	0	0	0	0	0	0	0	0	0	0	0	0	1	1	0	0	0	0	0	0	0	0	0	0	0	0	0	0	0	0	0	0	0	0	0	0	0	0	0	1	85	81	93	0	0
Bacteria;Spirochaetes;Spirochaetia;Spirochaetales;Spirochaetaceae;unknown genus;Spironema culicis	OTU_2	9	4	51	8	6	15	10	13	15	15	13	1641	17	9	3	15	12	12	20	17	15	19219	22	10	14	18	3956	0	7	0	10	0	12	19742	9	0	11	13	67	9	8	15	13	16	8	17	14	14
Bacteria;Tenericutes;Mollicutes;Entomoplasmatales;Entomoplasmatales Incertae Sedis;Candidatus Hepatoplasma;unknown species	OTU_18	5	4	5	5	3	13	5	13	5	8	7	5	9	6	27	12	32858	22	7	13	7	6	7	4	9	4	2	0	3	0	12	0	3	7	3	0	10	11	5	3	2	5	8	4	5	7	8	8
Bacteria;Tenericutes;Mollicutes;Entomoplasmatales;Entomoplasmatales Incertae Sedis;Candidatus Hepatoplasma;unknown species	OTU_261	0	1	0	1	0	0	0	0	0	0	0	2	0	1947	0	0	1	0	1	0	0	1	0	1	0	0	2	0	0	0	1	0	0	0	0	0	1	0	0	0	1	1	0	0	0	0	1	1
Bacteria;Tenericutes;Mollicutes;Entomoplasmatales;Entomoplasmatales Incertae Sedis;Candidatus Hepatoplasma;unknown species	OTU_373	0	0	0	1	0	2	1	0	0	0	0	0	1	1	3	1	1403	0	0	0	0	0	1	0	1	0	0	0	0	0	1	0	0	0	0	0	0	1	2	1	0	0	2	1	0	0	0	0
Bacteria;Tenericutes;Mollicutes;Haloplasmatales;Haloplasmataceae;Haloplasma;unknown species	OTU_978	0	0	0	0	0	0	1	0	0	0	0	0	0	0	0	0	0	1	0	0	0	0	413	0	0	0	0	0	0	0	0	0	0	1	0	0	0	1	0	0	0	0	0	0	0	1	0	0
Bacteria;Tenericutes;Mollicutes;Mycoplasmatales;Mycoplasmataceae;Ureaplasma;unknown species	OTU_548	0	0	0	0	0	0	0	1	1	0	0	0	0	0	0	0	0	1	1	977	0	1	0	0	1	0	0	0	0	0	1	0	0	0	0	0	0	0	0	0	0	0	0	1	0	0	0	1
Bacteria;Tenericutes;Mollicutes;Mycoplasmatales;Mycoplasmataceae;Ureaplasma;unknown species	OTU_623	0	1	0	0	0	0	0	0	0	0	1	0	0	0	0	1	0	0	0	780	0	0	0	0	0	1	0	0	0	0	0	0	0	0	0	0	0	0	0	0	0	0	0	0	1	0	0	1
Bacteria;Thermotogae;Thermotogae;Thermotogales;Fervidobacteriaceae;Thermosipho;Multi-affiliation	OTU_1321	0	0	0	1	0	0	0	0	1	0	0	0	0	0	0	0	0	0	0	0	0	0	0	0	0	0	0	0	0	0	0	0	0	0	0	0	0	0	0	0	2	173	57	0	0	0	7	2
Bacteria;Verrucomicrobia;Verrucomicrobiae;Opitutales;Puniceicoccaceae;Cerasicoccus;unknown species	OTU_1326	0	0	0	0	0	1	0	0	0	0	0	0	0	0	0	0	0	0	0	0	0	0	0	0	0	0	0	0	0	0	0	0	0	0	0	0	0	0	0	0	2	2	5	0	0	0	2	1
Bacteria;Verrucomicrobia;Verrucomicrobiae;Opitutales;Puniceicoccaceae;MB11C04 marine group;unknown species	OTU_788	0	1	0	0	0	0	1	0	0	0	0	0	0	0	1	0	0	0	0	0	0	0	0	0	0	0	0	0	0	0	0	0	0	0	1	0	0	0	0	0	0	2	0	1	0	0	1	0
Bacteria;Verrucomicrobia;Verrucomicrobiae;Opitutales;Puniceicoccaceae;Pelagicoccus;unknown species	OTU_1117	0	0	0	0	0	0	0	0	0	0	0	0	0	0	0	0	0	0	0	0	0	0	0	0	0	0	0	0	0	0	0	0	0	1	0	0	0	0	0	0	0	0	0	0	2	0	0	0
Bacteria;Verrucomicrobia;Verrucomicrobiae;Pedosphaerales;Pedosphaeraceae;SCGC AAA164-E04;Verrucomicrobia bacterium SCGC AAA164-E04	OTU_563	1	0	0	0	0	1	0	1	0	0	0	0	0	0	0	1	0	0	2	1	0	0	0	0	0	0	0	0	0	0	0	0	0	0	0	0	0	0	0	1	1	0	4	0	0	0	2	2
Bacteria;Verrucomicrobia;Verrucomicrobiae;Pedosphaerales;Pedosphaeraceae;unknown genus;unknown species	OTU_1116	0	0	0	0	0	0	0	0	0	0	0	0	1	0	0	0	0	0	0	0	0	0	0	0	1	0	0	0	0	0	0	0	0	0	0	0	0	0	0	0	0	1	0	0	0	0	0	0
Bacteria;Verrucomicrobia;Verrucomicrobiae;Verrucomicrobiales;DEV007;unknown genus;unknown species	OTU_11	3863	3302	7	7	1189	2894	10	633	1619	528	5	1186	696	1074	1393	853	7	5	1565	1908	2670	19	307	549	4524	7	6	284	6	1	9	2582	958	1523	13	0	270	1810	84	10	11	9	6	11	16	13	12	23
Bacteria;Verrucomicrobia;Verrucomicrobiae;Verrucomicrobiales;DEV007;unknown genus;unknown species	OTU_67	0	0	0	0	2	3	0	280	965	2	2	0	0	4	1	0	1	2	4870	1	0	1158	2	1	4	1	0	207	0	0	0	0	1	1	0	0	4	0	2	1	2	3	3	1	2	2	0	6
Bacteria;Verrucomicrobia;Verrucomicrobiae;Verrucomicrobiales;DEV007;unknown genus;unknown species	OTU_268	0	0	0	0	0	1	0	0	1	0	0	2	0	0	0	2	0	1	3	0	0	1	0	0	0	230	0	0	0	0	1	0	1	1	0	0	0	0	0	0	0	0	1	0	1	1	1	6
Bacteria;Verrucomicrobia;Verrucomicrobiae;Verrucomicrobiales;DEV007;unknown genus;unknown species	OTU_358	0	1	0	0	0	0	0	2	0	1	0	1487	3	0	1	0	0	0	0	0	1	1	1	0	0	0	0	0	0	0	0	0	1	2	0	0	0	1	1	0	0	1	0	0	1	0	0	0
Bacteria;Verrucomicrobia;Verrucomicrobiae;Verrucomicrobiales;DEV007;unknown genus;unknown species	OTU_393	0	0	0	0	1	0	0	0	0	1	1	0	0	0	0	2	0	0	0	0	1	0	0	0	1	1	1	0	0	0	0	0	0	1	0	0	0	0	1	0	1	1	0	0	0	1	2	2
Bacteria;Verrucomicrobia;Verrucomicrobiae;Verrucomicrobiales;DEV007;unknown genus;unknown species	OTU_1077	0	0	1	0	0	0	0	0	332	0	0	0	0	0	0	0	0	0	1	0	1	1	1	0	0	0	0	0	0	0	0	0	0	0	0	0	0	0	0	0	1	0	0	0	0	1	0	0
Bacteria;Verrucomicrobia;Verrucomicrobiae;Verrucomicrobiales;DEV007;unknown genus;unknown species	OTU_1217	0	0	0	0	0	0	0	0	0	0	0	0	0	0	0	0	0	0	0	0	0	0	301	0	0	0	0	0	0	0	0	0	0	0	0	0	0	0	0	0	0	0	0	0	1	0	0	0
Bacteria;Verrucomicrobia;Verrucomicrobiae;Verrucomicrobiales;DEV007;unknown genus;unknown species	OTU_1244	0	0	0	0	0	0	0	0	0	0	0	0	0	0	0	0	0	0	0	0	0	0	0	0	0	0	0	0	0	0	0	0	0	1	0	0	0	0	0	1	1	1	0	1	0	0	0	0
Bacteria;Verrucomicrobia;Verrucomicrobiae;Verrucomicrobiales;Rubritaleaceae;Luteolibacter;Multi-affiliation	OTU_31	866	201	2	3	720	840	249	35	1	3	2	2511	6	1533	887	199	588	1	10596	928	3	5	849	60	3	5	1	304	1	0	0	0	4	1	1	0	6	8	4	1	5	7	2	2	4	2	5	6
Bacteria;Verrucomicrobia;Verrucomicrobiae;Verrucomicrobiales;Rubritaleaceae;Roseibacillus;Multi-affiliation	OTU_39	3	2	4	2	4	8	2	5	0	1	1	1	2	1	1	0	1	0	3	7	2	3	6	0	8	744	0	0	1	0	3	0	3	5	3	0	2	2	10	1	2	0	2	2	7	7	7	5
Bacteria;Verrucomicrobia;Verrucomicrobiae;Verrucomicrobiales;Rubritaleaceae;Roseibacillus;unknown species	OTU_256	1	0	0	0	0	0	0	0	1	0	0	1	0	0	0	0	0	0	0	0	1	1	0	0	1508	1	0	0	0	0	1	0	0	1	0	0	0	0	0	2	2	2	1	0	1	0	5	4
Bacteria;WS2;unknown class;unknown order;unknown family;unknown genus;unknown species	OTU_1142	0	0	0	0	0	0	1	0	0	0	286	0	0	0	0	0	0	0	0	0	0	0	0	0	0	0	0	0	0	0	0	0	0	1	0	0	0	0	0	0	0	1	0	0	0	0	0	0
Bacteria;Zixibacteria;unknown class;unknown order;unknown family;unknown genus;unknown species	OTU_647	0	1	0	0	0	0	0	0	1	0	1	0	1	0	1	0	0	0	0	0	0	0	0	0	1	1	0	0	0	0	0	0	0	0	0	0	190	0	29	24	16	42	31	13	14	10	124	85
Bacteria;Zixibacteria;unknown class;unknown order;unknown family;unknown genus;unknown species	OTU_1004	0	0	1	0	0	0	0	0	0	0	0	0	1	1	0	0	0	0	0	0	0	0	1	0	1	1	0	0	1	0	0	0	0	0	0	0	0	0	0	0	1	2	5	0	0	0	118	100
Bacteria;Zixibacteria;unknown class;unknown order;unknown family;unknown genus;unknown species	OTU_1083	0	1	0	0	0	0	0	291	0	0	0	0	0	0	0	0	0	0	0	0	0	0	0	0	0	0	0	0	0	0	0	0	0	0	0	0	0	0	0	0	0	0	0	12	5	14	0	0
Bacteria;Zixibacteria;unknown class;unknown order;unknown family;unknown genus;unknown species	OTU_1223	0	0	0	0	0	0	1	0	0	0	0	0	0	1	0	1	0	0	0	0	0	0	0	0	0	0	0	0	0	0	0	0	0	0	0	0	1	0	0	0	0	0	0	1	0	0	90	114
[truncated: 16 more columns]
